# Supplementary material for: Genome-Wide Identification and Expression Analysis of Dendrocalamus farinosus CCoAOMT Gene Family and the Role of DfCCoAOMT14 Involved in Lignin Synthesis
Source: MDPI journal article supplement (doi:10.3390/ijms24108965), 2023-05-18
Supplement: s1 [file s1]

**Supplementary Document S1** The candidate *CCoAOMT* gene sequences of *D. farinosus*

>DfCCoAOMT1 (DfaB03G023550)

TACAACTTCTGTGCCAGGTTAGAAATCATAACAGCACGTTTCAAATATCCATTAGTTGG  
GACTTTGCACTGCTGTTTGTAGAATGCCTTAATTTTTGACACTTTGGTGAACATATTTGA  
CTTCTTACTGACCTTCCCTTTGCTCCTTCAATAGGACAGCAGTCAAAATCTTTTTGGCA  
GGAAACGCCCATAGTGAGTGCTGATTGTTTCGATAGAGGTTCACTCAGGAAAGAACAA  
TCACAAGATATGAAGCCAAAAACACAGAAAGTGACTGTTTCATGACGCACTTGCATA  
GGTAAGTTTCCTTTTTGGCACGTATGCCTTTAAAGGTGGGAGATGTTTTTATGTCAGTA  
ATAGCTGCCCTTTGATTGTAAGCATTTTTTACCAAGTTAGTGGTTTGAAGGATGATCTGT  
CTGGTATTAGTTCATATTAGTTGAAGGAAGGTTTGTTCGTTCAAGCTAGACTTCCTTATA  
TTCTGGAAAAGGCATTAACCTGTTTGAGGGGCTCCCAGAAGCTTAAGTTCAAGTTTGA  
TTTTTTGCCTTGAAAAAAGTTATTGATTTTGATTTACTAGTAAAGTTTCCTAGATTATG  
CTAGCTTCTAACCTATGTGAAATCGATGAACTATTCCACAGCCATCTTGCCACTTTCCA  
TGGAACAGTCTACTTTAGGTTTCTTAAGTTACACAAAACAGTATTCAGCTATACATCATC  
CCTCCGCTCTTTCTCAAATTAGTATGTGATATGCAGCATATGCTCAGTCCTATACTCCAG  
AATTCTGATGCCTCTACTTTTTAAGGTCTTGATTACCCACATTAGTTGACAGTTCTTCT  
CTTTCCAATCCTGGACAGCTTGCAGAGCGGTGACACTGAAGCAGGTCTGAGGACAGG  
AACAAGGTAACCTTATAATCAGATGGGCTTTCTGAATGATTTGCCCATTGGGGTGCTTC  
GTTTTGGCGGTGCAGAGCAGAGGCTATGATAATAGGAAAGTAAAGTAGTGGTGATCAT  
CAGATGCACCTTGTCTTGTACTAGCTAGCAGTTAAATCAGTCAGATTGTACTCGGATGT  
GAAATGTTCTGTAAAGCGACAGCTCAATCTATGAGCTGCCAACGACAGCAAATATATCC  
GCTGTTACGAGATAGGGAGATGTCAATCAGTCATATAAATAGTACTGGTGTATTAAGGC  
CATAGGGTGACCACATTTTGGTGGGAGCTGGAACACTGGGTTACAAGGCCATCTCCAA  
TCCCACTGCTGTAATGAACGCAATCTAGCGACCATGCATATGCTAGCAGTAATTTAGGG  
ATGAACCTGGAAGTGCTTGTCTTCTTATTATGCAGCACGTCTTCTTCTTTTTTTAATGGG  
AGTGTCTACACAACATTCGACTGTTTTTTAGGACAAAGGCAGTCAGATTTTGAGCCGTT  
AGATGGAGATCCAACGTCCTAGATTATTTTTTTTAGAGGGGTCATTTTTTTTAGGGGGTC  
TTGTATGGATGGATCCGTTGGATGGAGATCTAACGTTCCAGATCAATTTGACTGTTTTTA  
TCCTCAAAAACAGGCAATGTTGTATAGCAATACTCTTTTTAAATTTGGTCCTAGTGGCA  
GCGAGAAAATGCGCCGATGACCGTGAAGCACGTGAAGCTACCCGGCCCTGAGCGCGT  
GTCACGGAGGGAGGCAGAGTACGTCCGCGCGCGCCTCCATGCACGAGCTCACCCG  
CCGTCGCCGTCGCCGCCACCGCACCCGCCCCACCTTCCACCGTCGTGAGTGCTCAGC  
TCGGTGCATGCGAAGCATGGCACCACCACCCGCGCCACTTGTTTGATGCCCTCGCCA  
ACAATCCACTGCACATGCACATACACCAAACCGCTCTAATCTCGCCTTCCTTTCCACGT  
ATGTGATATATGTCCCAGCCACGGATTAACAGCAGCCAGCCACGAGATCGAGTGAGG  
AATATCGCGCGCACGTACGATATGGCCAGCGCCGACGGCGAGTCCGCGGGGGCGC**ATG**  
CAGAGCAACGGCGGGGAGGAGCAGACGCGGCACCAGGAGGTCGGACACAAGAGCCT  
CCTCCAGAGCGACGCGCTCTACCAGGTGACGATTTGATAGATCGTTTCGCTGCAAAACA  
GCTAGCGTGATTGCCCGTTCTGCTCTCTGATCGGTCTGCTCCAAGCTGATGGTTTGATAT  
GCGATTGGTCTGCAGTACATCCTGGAGACGAGCGTGTACCCGCGCGAGCCGGAGTGCA  
TGAAGGAGCTCCGCGAGATCACCGCCAAGCACCCATGGTGAGTGGCCGTGCACCACC  
TGTGCGTGCGTCTCGCCTGACGATCAATTCTGTGGCTGATTTGTGCGAAATCTTCGCTT

CCCTTTGCTGCAGGAACATCATGACGACGTCGGCGGACGAGGGGCAGTTCTGAACAT  
GCTGCTCAAGCTCACCGGCGCCGAGAAGACCATGGAGATCGGCGTCTACACCGGCTAC  
TCCCTCCTCGCCACCGCGCTCGCCATCCCACAAGACGGCACAGTTAGTAGTAGTCCGT  
AGTACCCACTGCCACATGCACACTCTTTCGATCTTGACCACAAGGCTCATGGCATCCG  
TGCACGCGGATCCTGGCCATGGACATCAACCGGGACAACACTACGAGCTGGGCCTGCCGT  
GCATCGAGAAGGCCGCGCTCGCCACAAGATCGACTTCCGCGAGGGCCCTGCCCTCC  
CCGTCTTGACCACCTCCTGGAGGACGTGCGTAATACATTAAAAATCATGCATCCATCC  
ATCAATTGATTTGATGCTAACGAACAATGTGCAATGATCTGTGCGCACGCAGGAGAAG  
AACCTGGGGTCGTTTCGATTTTCGTGTTTCGTGGACGCGGACAAGGACCTCAACTACCACG  
AGCGGCTGATGAAGCTGGTGAGGGTTGGCGGCCTCGTCGGCTACGACAACACGCTCT  
GGAACGGCTTCGTGCTGCTCCCCGCCGAAGCGCCCAAGCGCAAGTACATCCGCTACTA  
CCGCGACTTCGTGCTCCAGCTCAACAAGGCCCTTGCCGACGACGACCGCGTCGAGATC  
TGCCAGCCCCCGTCGGCGACGGCATCACGCTTTGCCGCCGAGTCAAGTGA

>DfCCoAOMT2 (DfaA06G007370)

AAGAAAATGCACTGAAAATAATAAAATGACAGCAATAATACCATTTTTTCAGCCGGCCCT  
AAAAAGATTGGCCCAACAAAAAATGCGTAAAAGAAATGGCCCAGCTCGGGGCCCAA  
AAACGAAATCGCGCAAGCGGGCCCAACATTTACAGACGCGCGCGCAGCCCGGTTCGG  
AAAACGCGCGCGGCGCGTGACCTGAAATGCCCCGTACGGGCCAAAATCGTCAGCGAGG  
CCCAATGATCCCGCGTCTTACCTGCGCGCGCCGTTCGGATGAAATCTAACGGCCGTAAG  
AGCACGCGGCAGGCATTAAGTCCCCGAAACCCTAACCCCTAATCATTTCACCCCGGTTCT  
TCCCGAAAATACCGGAGCGGCGACAGCTCGCGCGCTCGCGCGGAGAGCGGCGGCGGC  
GGCTCTACATGGCGGCATCGGCGGCAGCCCCGCGCGCACCCGGCGACGGCCCCACGCG  
CAATGGCGGCGCTCGGGCGGCACCGGCGAAGCCCCAGCGCGAAGCAAGGCGGCGCG  
CAGCGACCCCGAGTGAGCAAGGCAGCGCGCGGCGACGGCGGCGGCGCCCGCACGG  
AGCGGCGGCAGCGTGAGGCGGCGGCGGCCCGCAGCCGACGGTAGCGGCGCCCGCC  
GAACGGGCGGTGACGGCGGCAGCGGCGGCGCCCAAAAAAAAAAGGCCGTAAGTCCGA  
TCCATTTTTTTTTTTGTTCTTGTTTTGCCAGCGCCGATCTAATTTCTTTCGGGTGAATTGG  
GTTTTTAGGGGACTTACATTAGGGTTTGCAAAATAAAATCAAATCACCTCCTTCTAAAT  
GCTAAGCCGAATCGTTAACAAAATTAATCCGAGCCTCCAAAACCAGACCAAAAATCG  
GGTTGGGTAATAAGGGTTCATGATGAGCTAGGGGTGCTCTGATACCAATGTTAGGTTT  
AATCTAAGTCTAAAACATTAACAATAGCCTTAACCCTAGATCAAAGGCATGAACACCTA  
GCCAAAACATCACTGCGGAAGCGTCATGAACATACCCGAAGTTGAGGCGGCCATCTTG  
AGAGGTCCTCGGTTGGTGCGGACGGAGGAGGTCGGCGTCGGTGAAACGGAGGTCGCC  
GGCGTGACGACGGAGCCGCGGACGGAGATGAGTTTCGGCCTTCGTTACCCACAACG  
CCCATGATAGATCGGTTCTTGTTAGGGTTAGAGAGACTTAGGACAACGCGTGTTTTGT  
CTTTTCCGAAACCCTCGTTTTTATATGGCGCTGGGTGACCGGGACCGAAACCAAACGG  
GTTGGTTGCCGTCTCCGATCAAGACGTGCGAGTGAGGCGTGCCTCCCTGAAAACCTCG  
GAGTTGGTTAGCCGAGATCAACCCAACATTAACCACTTACATATGCGGATGGAAAGAAT  
TGACAAAGCGCCTGTTTCATACCAACAACCTGATGTCTCTTTGGTACTATTTAAGTCTTACC  
CGAGAGAGAAGAAACAATAACAATAACACAAGACAGAACAAACAGCAAGTTCATTC  
CGCATTAGGATAAGTAGTATTTTTCTGTAAATTGTTAATTTAGAGCAAGTTGTAATCTTC  
ATATAGCGACCAATTTTTTTTTCATTCTTCTGTGAGGCTCAAATCTCTCTATTATTGGTAAG  
ATTGACGACTCAATCGTCGACATCATGTCTCAAATGTATTTCCCTTGATGACTCTGAAA

TCAAAGAAATTTTGACAAAATACATTTCTTAGTTAAAAAGTGCGGAAGTTTATGGCAC  
TCATTCACAGCTTAAACTTACACATAGATCATACCCCTTATGTCTTATTTAAGGACGAT  
CTTAGATGTTGGCATGTTGCATCAGGATTCAGGCATGACCAAACCTTCAGCCAAGATAT  
TATTCTATGAAGAAAAAAGCGTTCGCTAAAATATTTTAACTGATGGTGATGGATACCA  
GATGGCAAGGACTAGGCGTCTTAGGTGCTGCGATCGGCGGGGCTTCTTGTTTTTGTCTT  
TTTTACTTCTGCGTAGGAGAATGGCCGCCGCCGACGCCGAGAAAGGAAGAAGACGG  
CCGCCGGAAGCAGCCTCCACAGCAAGACCCTCCTCAAAGCGAGCCACTGTACCAGG  
TAAACCATCTGAAGCACCAATATCCCCACGCGGCACGCGCCCAAAGGCCTTCACCTGA  
CAAGGCTAACGCTTCTGTCTTCCGTTCCCTGACGTTTCTCTTCCAGTACATACTAGAATC  
CACGGTGTTCCCTCGCGAGCCAGACTGCCTGCGCGAGCTCCGCCTCGCCACCGCCAA  
GCACCCCATGTAAGGCTTGCTCGATTGCGTGCTGCTTTTGTGTGTTGGGTCAGTGCACG  
GCTGGTGTTTGACGCTTTGTCCGTACGGGTGAGGCGTGCTGCGCAGGGCTCGCATGGC  
GGCCTCGCCGACCAGGTGCAGCTGTTTGGGCTTCTGATCGAGGTGCTCGGCGCCAGG  
AACGCCGTCGAGGTGCGCGTGTTACCGGGTACTCGCTGCTCGCCACCGCCCTGGCGC  
TCCCTGACGACGGCAAGGTTAGTATCTCTAATACTTGCTAGTCTGTTTAGGTGTATGTAT  
GATCTTGGCTTGATCTCCGTGCTCGACGGCAGATAGTAGCCATCGACGTTAGCCGAGAG  
AGCTACGACGAGATAGGATCGCCGGTGATCGAGAAGGCCGGCGTGCGCACAAGATC  
GACTTCCGCGTGCGGCTCGCGCTGCCGGTGCTGGATCAACTGGTAGCCGAGGTACACT  
ATTCTCCGCGTTCGTGTGCGCGTCCGGCGTCCCTGTGCAAATGCGCAGCGCAACGAG  
ATGATCGTGATGTGGCCACGGCTGGCTCGACTTGACAGGAGGGCAACAAGGGCAGGTT  
CGACTTCGCGTTTCGTGGACGCGGACAAGGTGAACTTCCCCAACTACCACGAGCGGCT  
GCTGCAGCTGGTCAGGGTCGGGGGCCTCATCGCCTACGACAACACGCTGTGGGGCGG  
TTCCGTGGCCGTGTCCGCCGACGAGCCGCTCTCGGAGAGGGACCGCGCGCTCGCGGG  
GCTCGCCAGGGAGTTCAACGCTGCAATCGCCAACGACCGCCGCGTTACGGTGTCGA  
GCTCGCGATCTCCGACGGGGTCATGCTGTGCCGCCGCGTCGCC

>DfCCoAOMT3 (DfaB06G012070)

ACAGTTACTGGCTTTTAAAGAAATATCTTTTTAAGGCGAGGTCTACAAGTTGATTATA  
GTACATACTGTAGCGACTTCATTTATATTGGTAAAAACCGCACACGAGTTTATGTTACTC  
CGTACTTTTCCTCACGAACAGTCCAAAAGCCATAAGGCACAACCAAAGCTATAAAACC  
GAAGCAAAAGGAACACACCCTATATCTACCCCTGTAGTTGTAATTGCCCATGTCTACAT  
GAAGTCCAACAAAGCCTAATTAGTTCATCTATCTTAGGAATAGCTTAAAAAAGTCATGC  
CAATTAATTTACAACGATGTAGACTACCTTAAATTTGTTGATATAGACCACTTCAATCT  
ATCCACCGTGCGTGCTTATGATCACATAGTATTGATAAAAAAAGTGCGCACTATCT  
TGATAGGCATCTCATTAATTTTTCTCACTTTTTTTTGAGACAAATGTCGATAAATGGTTG  
TAATATATACATTTAACCAATTATGTCTATAGCACACTACATTAATAATAACTATAGAAAATG  
ATTTAAGTACCTTCGATAAACTGCAGCGATGTTAATTATTTTGACGTCACAAACCTGAT  
TTTTTGGTGTTACTTCCCTCGCAAAAAATTATTATTATGCATATTACTTTTGAAGTTTCT  
AAAGTTTGCCTAGACATTAGAAAGCATCTATATATACCGGTGAGATCGATGGCAAGAAA  
TTCATACATCCAAAATATTAAGCATTGGTGTTGACTAAGGGTACATTCGAATAGACTTG  
TGACTTATGGCTTTTTCATTTCTTCTATAGTAACTACCTTTTAAACGACGTGTTTTTAAAG  
TTGAGTCTGCTAGTTAATTGTAGTATATAATGTACTAACTTTAGCTATACCGACTAAAATC  
ATATACTACTATATCTTTTTTCGTATTTAAAAATCAAAGCTACGGTCAAAAAACCACT  
TTAATCTGAGTGCACGCGTGCTTACTATGATGCATCCAGATACTAATTTGACTCTTGCA

CATCCGTCGTA C T A C T T G T G T A C G T A T C T G C T C C A A C G C A C A A G G A C A A A A A C A A A T G  
C A A C A C C T T C T C C T T G T T T T A A A A T A A A T A A A A A A G G C G G G G T C T G A C A C G T T G C T  
T A G A T A A A T A A A T A T T C A G G T T G T A G C T C A G T T G G T G A G C C G C A T C C G C A C C A T G C T T G  
C T C A A G A G C C G T A C C G G A C A A T G A C A C G A C T C A G T G T C T T C C T C G G C G A G G T C G C G T A  
G A A T A C A G G C A G G A G C C A G G G A C C G G C T T G T A A T T T T C T T A C T T C C A A G G C T C C T T C T  
G T A A T T T C T G T G G T A T A T A C T C T T G T T G T A C T T T A G G G G C T A G T T G C C T A A A A A A A A G T C  
G C G T G A T C A G A T A A G T C G T G T G C C A G T G C T T G T T T G A T A T G T G C C A T A A C T A A T T G T T T C  
C T T G T C T T C G A T C A A C T C G G C T T C A G C T T C T G C C T T C T G G C T T A T T T T T A C T A T T T A T A A  
G T T T C G T C T T T T T C T G A A C T T T T G G C T T T T T G T T G A G T T T T T T G C C G G T C T T T T T T T C C  
C G T A T T T G T T T G T A T T A T A C G T A A T G G G C T A A C A T A T T T T T A T A T T T T T A A A T T T T T A A A A  
T T T A A T T A T G C T A A A T A A G C C T C T G T C A G C T A C A G T G T T T T C A G C C A T A A G C C A T G A G C T  
T T T C A G C C G A A C C A A T G A C C A C C T T A A C A A A A G T T A A T A T G C T T C C A G C A T G T C A T G C A  
A G T A A G C A G A T C G C C G T A T A T A A G A C T T G C T T G A A A G T T G A A A C A C A T G A A G T T C T C T G  
G A A T C C T G C G T A A A T T T A T T T T T G G A A C A C A T G A A T T T C G C T A G A A T T C T A T G T A A A T T T T  
A T A A A C A C A C A G T T T G A G T T A T A A A G A A A A A A A A T T C C C A T A C T T C T C G G G C C T A G A  
G T G T C C G C A C C T C A C T G A C A T G T G G G C C C C G C A G A C G G C A A G C T A A T C T G C G T T T C T G  
T T T C C A C T T G G C G G C T G C C T C C G G C G A C G A T G C C T C G C T T C G C C G T G G C C T C C T C C T C C  
C T T C C T C C G T C G G T G G C G G C T G C T G C T G C T C T C G G G T T C G G C T C C A G G C A T C C T C G C G T  
C C T C C A A T C C T T A A C C C T A G C C G C C G C T C C G C C C C G C C G C G G C T C T C C G C C A T G G A G C C  
G C C G C C T G T G C A T G T G C T C C T C C T A T C C T C C T C G A C A G C G G C G G C G G T G G A G G A G G C  
A C G G C G C G G G C G G A A G C A G C T G G G A A T G A C G C C G C A G C T C T A C G G C T A C C T C C T C G C  
C A A C G T C C G C G A G C A C C C C G T G T G C C C C T C G C C C T C T C T A C T C T T C T G T T T C G T T T T G  
A G C C A A T T T G G G G A A A T T T T G C T A A A C T C T G G C C A C C T C A T G G A T G C T T T T T A G A T C C T  
T C G G G A G C T C C G C C A A G A G A C A G C G G C C A T G A G A G G A A G C C A G A T G C A G G T A C A T T A  
G C A T A C A T A A A C T T A A A G A G T A C T A C T C T T T A G A A T T T A G A T G G A G G G T A T T C G T T T T G T  
T G C A T T G T G T C C A T A A G G T G T A T T T T T G G G A T A A C T C T A T C G T C C G T T C A A G T G T C A A G A  
C T C G A A A C A T C C G A T G C G C T A A T T A T A C T G C A G C T C C A G T G C G G C A T T T G C G A T T T G C A  
G T T T A T C A A C A T T G C T G G G T T T T C T C A A T G C G C C A T G G A A C G G G C T G G C A C T T G T T A G C  
A T G T T G C A T G C T T T C A T G G A C A T T C T G G G T A T A T A G G G A T T G C A T G C G T A T A A T G C T G T C T  
T T T G A T G A T A C G C A T T G T A T T G C T T C T A C A G C T A G G T C T T T T T G A G A G T T T T A C T A T T A T  
T A G A A G G T A A C C T T A C G A C C A A G T C A C A T A T T T A T C A A T A A T A T G T G A T T T G A T G G T A A A  
A A C T A T C T T T T T T G G A G A C A T T A T G T C C A A A T C A T T A T G C G A G G A T G A G T C T A C T A T T C T  
T T T A G T G C C A T T T T C T C G C T C T T C C C T A G A A C A G T C T T A A T T T T T T C C T A G G G A C A T A C  
C G A A A A G A A A T C C A T T T G T A C A T A T T T A A A T T T G T T T T C T G A A A A T A T A A T G A T A G T C T T  
T G G A T A C G T T A C C A A A A T T C T G T A T A A T G G T A A T C A C T T T C A G C C G G T T G C T T T G T C T T G  
G T A G G T T T C T C C C G C A C A G G C T C A G C T G C T A G C G A T G C T T G C A C A A A T T C T T G G G G C A  
C A G C G A T G C A T T G A A G T T G G C G T C T A T A C T G T A T G T G A A C C T A G T G T T T T G T A A T T T A G A  
T T T T C C T A C C A T C C A C T C T C A G T C A G T A A A C A C T G A A C A G T A C T G A G T T A T T G C T T C T A C  
T T G G A A C C A A A G C A T C C T A C A T T G A T G T T A T A T T A G T T G T T G A T G T G T T G T C C T A G C T C A  
C G A A A T A T A G A G T T C C A A A A A C C G G A A C C G G A A G A A A T C C C G G T C G G T G G C C G G T A A  
A G G T A A C C G G G C G G T T A C C G G A A A A A C C G G T C A C A A T T T G A A A A A T C A A A A T T T G A A T  
T T T G A G A T G T T T T G A A A C C G G T A A C C G G A A A A C C C A G A A A A A C A G G T C A A A A T T C G  
A A A A T C A A A A A T T G C T A C C G G C C G G T T T T T C G G T T A C C G G T T G C C A C C G G T A A A A A C  
G G G G C C G G T A A C C G C C G G G A T T T T G A A C C C T G G T C C A C A C A T A T G T G C G A G A A A A A T A

AGTATACATGAGTGGGTAAACATATCATCTGTGACATCTATGGTATCTATTGTTTGCCCTG  
GAAGTGATACCATAATGGGCACTTCATATTTTCAAAGCACACAAATGGTACTTCAGAAT  
TCTGAAGCCTGAACGTTGCACATATTTATGAGAGCCGTGTAAGAGCATGTACAATGCAG  
GCGCTTAGAGAGGTGCATTACTGTTTCCGTCAGGGACAATAATGTCATGCATGATGTGA  
ATCCGTCATATACGCATGCATGCATGCATCCATATGTGCTTACTGTTTAGTAATGGTGATA  
CCTCCATGATGTAGCGGACCCATATGCGGCTGCATTGTACATGCTCTTACAGTAATGTTT  
GTGTCAACTTGTCAAGTGCTGCGATGATTAGTGATCATTCTAGACCTTGTGAAGGAGCT  
AATTTTGTACGAAAGCAACAAGCATTGCAAATTCACTAACCATATCTTAGCACTCCTTT  
AATCTTTTTACAGGGATATTCATCATTAGCTGTTGCACTAGCTCTTCCTGAATCAGGTCG  
TTTGTTGCTTGTGAAAGGGACGAAAGATGTCTTGAAGTTGCCAAGAAATACTATCAG  
CGTGCTGGTGTGTCACACAAGGTGATTATTTTCGGCCCTTTTTGCTTGATGAGATCGGT  
TGATCATAACCAATGATTCTGAACTACATAATTTTCTATATTTGTACTTTACTTCTCTATCC  
TTGGCTATAAATTTACAATTAATTGTGTGTGATGTTTCAGTAGGTTGAAGAACTTTTTTG  
GTGCAAAGATTAATTCTCCCAACAATATAAATCATGGGAAAAATAATTTTTCAGAAGCA  
GGGCAAATCTTCTTTTTAGTTTCACCAATTTCCCCTTTATGTCTTTGTTATTTTACACCA  
TTGTTCTTAAATGGTTCCACTTTTACTGACATATGTAGCACACTACAGTTCATGAAATTA  
GGAATGCAACCACTTAATACATTGCATTTGTTTTGTAGGGGATCTAATGTGTGTAGGCTT  
GATCAATATGTATTTCTCTTTAATGATTTCTAAGCACTTAAAACTGAAACGTTGACCTT  
TTTATGGAATCGCCTTGAATGTATAGAATATTAGTTTTCAAGGACCAGTTTGTATTCTTG  
CATATTATATTTTCTATGCTGATCTGTCAATTCTGTCTTAAAATTGCTTAGGTTTATGTCAAG  
CACGCTTTAGCTGCAGATTCCCTAAGGTCATTGCTCGATTGTGGTGAAGCTTCCAGGTA  
TAGTAATTTTAGTGTGGTATAATCCCCGTCATCATATTAGTTGACATCATACATGTTCTAA  
CTAATCCTTTCTTTTTCTGTTTTTTCCCTAGTTATGACTTTGCATTGCTTGATGCAGAC  
AAGAGAATGTATGAGGAATATTTTGAACCTTCTACTTAAGCTAGTAAGATTCACCATGCA  
GCTTATCTTCTGGGTTATTTATAACTCATTCTAGTCTATAACACATGTGGATGTGGTCCTC  
CACTCTCTGTTCCATAGTGTTTTCTCATGATAATGTAGAAGATCCCCCATCTTGCCACG  
AGTTTTACGATTTTATCTATAATTTCCGCACATGATGATCATAGCATTGTGTTTTTTTATA  
TGTTGAGCAATACATCTTGTTGTGTTGTAGGTAAGAGTTGGTGGTTTAATTGTAATGGA  
CAATGTCCCTTGGTATGGAAGGGTTGCTGATCCGCTAGTAAGTTCTTCTTTCTTTTTGAG  
CTTTGACATGATAAAGATGTTACAGGGTAGACATTAGATAATACTTCTCTGGCATTTTTT  
CTTAGGTGAATGATCCAAAGACAATCAGTATAAGGAACTTCAATAAGAGACTTTTGGA  
GGATAAACGTGTCAATATCAGCATGGTCTCTTCTCTCTCCACCTCTCATATGCTTGGTC  
ATTGCACAGTTATTAGTCATTACTTGCGAATGTTGATTGTGAAGCCTTAAAAAATCTTTA  
TATTTCTGCATAATTATTCTGTGCTCTGGAGTATGCAAAGAGCACCAACAGTGATGTGTA  
GTAGCGGTGTTGCAATGCCAGCACAAATCAAGGTTCCAAAAACAGGAACCGGAAGAAA  
TCCCGGTGCGCGCGCGGTAACGGTAACCGGGCGGTTACCGGAAAAACCGGTAAAAAA  
TCGGTCACAATTTGAAAATCAAAATTTATATTTTGAGATATTTTGAAACCGGTAACCTGGA  
AAAAAAACCGGCCAAAATTCGAAAAATCAAAAAATTTATACCGGCCGGTTTTTTGGTT  
ACCGGTCTCCACCGGTAAAACCGGTAACCGGCGGTTACCGGCCGGTAACCGGCGGTTA  
CCGGCCGGTAACCGCCGGGATTTGAACCATGAGCACAATACATATCCCAAGTTCAAA  
ATTTTTATTTGCCTAATATTGTGGCACATTCAAGCCATGGTCATGTATACCTGTTCCGGATG  
GGGAATTTGGATTGCAATCCGTAGGATTTAGTTCAAATCTGCAAGAATTTGAACCAAAT  
CCGAAAAATTCACAAAGAAATCCCCTTCATCCAAACACTCCCTAAATGTGTAGAGTCC  
TCTTCACTATCTTTATACATGGTCAACTGCTTCAAACCTTTATACCCCTTGTATCCAA

ACCTTCTTTTGATATACCGTTGACCATCCGTTTGGTCTATGTACAACCTTCTGTGAGAAGA  
AAACAGTATGCGTAGCATTGCTCCGATTACAAGTGACTCTTGCAACCAATATGCAAAT  
GAGAACCATAATATTTGTATCACTTAGATTTTCATTTGATACGCTTTTACCATGATTCAGT  
GCCTCAATATCCCATGCCCTTCTCATGTGTTATATGTTTCATACCATCTGTATGTGCTTAAG  
TACTGGATCTTGATTAACAATGGTGTATATTTTCGTGAGATTTGCAGGTGCCAATTGGG  
GATGGGATGACAATTTGTCTGGAAGCTAGTAGATACT**TGA**

>DfCCoAOMT4 (DfaA07G002980)

GTATTTCTAAATCAAACACTAAAAACATATGTATTTCTAAACATTCGTGTGTATTTCTAA  
ATCAAATCCTAAATCTAAACATTCATCAATCTCGCTCAAACCAAACCTAAAAACATGT  
GTATCTCTAAATCAAACCCTAAATCTAAAACATTCATCAATCTCGCTCAAATCAAACCTT  
AAAAACATATGTATTTCTAAATCAAACCCTAAAAACATATGTATTTCTAAAAATCAAACC  
CTAAAAACGAATCTATACACATTACTACTTTTACATTACGCATATCTATTGAAAATCCAA  
CCTAAAACCAAGCCAAATTTAACTAATTTTCATCTAGGGTTTCAAATCTTCCCACACGAA  
ATGTACCTCAAATAATCCATATTTATTGCAAAAAATCAAGGGAAATGAGGGGGTTCACC  
TTGCTTACTCGATTTGGAAGTAAAATCGCGAGAAAAACGATGGATTTGAGTAGATTTTG  
AGGGGAAGAGAGTGGCGGCGGCGGGTTCGCTTCGGCTCGGACTGAACAGAGTGA  
GGGGGTGGGGGGCTGCGCTCGGGCTTAAGTCCCAGAGCACGGCGCCACGGCCGTTAG  
CGCCGTTGGTACACAGCACGACGCCATGAGCTTTGGCGCCGAGCTCTGCCATCGTGGA  
TCTTACGTGGCCAAGCACGGCGCCAAAGCATATGACGCCGTTCTGTGTACCTTGAGCG  
CCATATACTTTGGCGCCGTGGTAAGGGTCCATTTTTCGAAATCTTTTCTCCAGGGATCCA  
TATGTAAAAAACTTTCAAATTTGGGCTAACAAGTAAAAATTTTACCATATTATTCTTCT  
CGAGAGCCTAGCGTGTCCACATCTCATTGACATGGGGGCCCCGCAGACGCCAAGCTAA  
TCTGCGTTCCCGTTTCTACTTGGGGAAAATTGCTCTCATACCACAAAGTTAAATACCAT  
CCTCCCTATTGCCACATACTTAAGTGGCTTTGTTATTATGCCACAACTTGAGTGTTTTT  
CCTTTCTTTTGCCATTTCTCCTCTTAAAGTCTATTTTAATTTTATTTTGCATTTCCCTAAC  
GTGAATTGACCTTTTTCGCTCCCTACCTCGCCCTCAACGCTAACCTCCTTCCC  
CGCCGGCTGCCAACTCCCCCCCCCCCCGCTCCCTCCATCCACGCCACCGTCTCCCTC  
TTCAGCTCCGCCTCTGGGGTCCCCCTCGCCTCCGTCGACGGCTCCGCGCTCACCCCTCCT  
CCGCACCGCCGCGCTCTCCGCGCTCGCCGCATCCCCATCTCCCCGACCGGCCCCCC  
TGCACCCTCCCCACCCGCATCGCCGGCGTGAAGGACCCGACCAGGTCCAGGTGCGC  
CCCCGGCCGCAGCTGTTCCCCCGCACGATCGGCTCCTACGACCCCATCGCGCAGCTCA  
CGACGTCCGCGCGGCCACCGCCTTGTCATGCCGTGACCTCCTCGACGGTGATCCT  
CGGGTGCGCATCCCGAAGCTTCGAGGCGAGCACGGTGGATTTGGCCCTGGTGCGGTTC  
CAGACGAGGATGCGGGAGATGGAGGAGAGGGCGGCCAGGTGGGCTTCGGCGAGGTA  
GGGCGCGAGGGCGCCAGCGGGACGAGGCGCTCCGGTGGGGGAGGGTGCAGGGG  
GGCCGGTCGGGGGAGATGAGGGATGCGGTGAGCGTGAGACGGCGGCGGTGCGGAG  
GAGGGTGAGCGCGGAGCCGTCGACGGAGGCGAGGGGGACCCAGAGGCGGAGCTGA  
AGAGGGAGACGGCGGCGTGATGGAGGGGAGGCGGGGGGAGTTGGCGGCCGGCGGG  
GAAGGAGGCTAGCGTTGAGGGCGAGGTAGGGGAGCGAGGGCAAAAAGGTCAATTCA  
ATGCAAAATAAAATTAAGTAACTTTAAGACGAGGAAATGGCAAAAGAAAGGAAAA  
AACACTCAAATTTGTGGCATAATAACAAAACCACTTAAGTATGTGGCAAAAGGGAGGA  
TGGTATTTAAGTTTGTGGT**ATG**AGAGCAATTTTCCCTTCTACTTGGCGGCTGCCTCCCC  
CGACGATGCCTCGCTTCGCCGTGCCTCCTCCTCCTCCTCCGGCGGCGGCGGCGGCGG

GGCTGCTCTCGGGTTCGGCGCCACGCCTCCTTGCGTCCTCCAAGCCCAAACCCTAGCC  
GCCGCCGCTCCGCCCCCGCCATGGCGCCGCGCCTGTGCATGTGCTCCTCCTCCTCGA  
CAGCGGCGGGCGGTGGAGGAGGCGCGGCGGGCGGAAGCAGCTGGGAATGACACCG  
CAGCTCTACGACTACCTCCTCGCCAATGTCCGCGAGCACCCCGTACGCCACTCCCCCTC  
TCTTTGTGTATATCTCTATCGTTTTGAACCAGTTGCTGCAATTTGGGGGAATTTATTTTG  
CTAGGTCTTGACCCCTGACCAATGTGCGTGTGTTGTTTATCCTACTCTGGATACGCTTTT  
TAGATCCTTCGGGAGCTTCGCGAAGAGACGGCGGCCATGAGAGGAAGCCAGATGCAG  
GTACATTAGCATACATAAACTTAGAATACTACGCTTTAGAATTTAGATGGAGAGTGTAAC  
GCCCCATTTCTGAGATCGTTGGATTTCCCATTTGCTGAGACACGGCCCCATTTTTGAGGT  
CGTTGGATTTCCCCGTAGCTGAGTGTGCATCAAATGTGCTCATGCTTTATTCATAAAAGC  
CACACTTAGTACAGTAGATTATAGCATGTCAGCCAAGTTTACAATAAAAAGGGCGTCCA  
ACCTCAAAATTTATATTTTCATCACAAAAGAACTTCTAAAAGATCCACAAGACGTAAAAC  
CAGTAATATCTCCTAGGGAATCATCAAAGTCTTCTTCGAAAGGCTCTTCATTGACTTTTCG  
GAGTTTCTTTTGTTGATATTTTAGCAAGTATGAGTACGACCGGCGCCTCAGCGGGGTGG  
CACGACTTCGCCGTCCGCCTCGTATGCATTGCCTCGACGGGACAGCATGCCTTTGCCAG  
GAGACTTCGCCACCCGGCTTGGAGGCATCGCTTCGGCGGGGCCGCATGACTTCGTGCG  
CCTCCTTGTAATCATCGCCTCGGCGGGATGGCCTGGCTTCGGCATAAGACTTCGCCGCC  
TGCCTTGAGGCATCGTCTCGACGGGGCGGCACGATGTCGACCACCTCGTACGCATCA  
CCTCGGAGGGACGTACCGGTTTTGGCGTGAGACTTCGCCGACCTCGTAGACGTTGCGT  
CGGAGGGACGAAGCCACCCCTGCTCTGCTTCCATAATTTCTTGGTGGACTCTGCAGTC  
GCATTATGATCAGTAAAAGAAAAACCTCTTCCAGGGGCTGCAAGCTATCAGTTGCATC  
GTCTCACCAGTCAGCACCCCTTGCGCTTACTATTGGGGGACGGAGGGCTGGGATAGTTT  
GTCACGTCAGCTCGCCATCAGGACCTCCGCGCTTGCTATTGAGAGAGTTCTGTTGTAG  
AGGTGGTCCAACCCCTGTGACTGTGCCTTGCAACTGGCTTAATATGTAATAGGCTCAA  
TAGTATAAAGGAATATACCAATGTACTCCTACCTTATGTAATTATTAAGGGATAGGAAGA  
ATTTCTCATCCTACTCCACTTATATATATAAACCCCAAGAGGGGCATGAGGAGGGGAG  
GTCCACTCATTTCCACATAACCATCTCTTTGTTGGCTCTCCTCTTCTAGGCTCCCTCTTTA  
CTATTTGGTCTGTATCCATAACATCTAATACTCTTTTAGTGTGTTTTCTTGTTTTTTTCCC  
TAGAATAGTCTTAATTATTTTCGTAGGTATATCCCAAAAAGAAATCCAATTTACATATTT  
ATAATTGTTTTTTCTGAAAATATAATGATAGTCCCTGGATACATTACCAAAATCTGTATA  
ATGATAGTCACTTTCAGCTGGTTGTTTTGTTTTGGTAGGTTTCTCCCGCACAGGCTCAG  
CTGTTAGCGATCCTTGCGCAAACCTCTGGAGCACAGCGATGTATTGAAGTCGGCATCTA  
TACTGTATGTGAACCTAGCGTTTTGTAATTTAGATGTTCTTACCTTCCACTCAATCAGTA  
CTCAGTAAACACTAAATAGTACTAAGTTATTGTTTCTTCTTGAACCATAGCATGCTATA  
TTGATGTTATGTTAGTTGTTAACATGTTGTCCTAGCACACCAAACATAGAATCCACACAT  
ATGTGCGAGACAAATAAGAAGTATATGAGTGGGTAAACAAATCATCTGTAACATCTC  
TGGTATCTGTCATTTTCCCTGGAAGTGATAGCATAATAGGCACTGCATCTTTCCAAGGTA  
TATACCCAGTAAGATTTTAAATAGTACTTTCAGAATGCTGGTACTCTCAGAATGCTGAAG  
CCTGAATCTTGCAATGTTTTCTTCTTCAAACAATATTTCTGTCAGGGACAATAATG  
TAATGCATGATGTATTGTTTATGTCAACTTGTCAGTGCTGGAATCATTAGCTACTTTTGT  
ACAAAAGCAACAATCATTGCAAATTTGGTAATCTTATCTTCTCACTCCTTTAATCTTTTC  
ACAGGGTTATTCATCATTAGCTGTAGCACTAGCACTTCTGAATCAGGTCGTTTGGTTG  
CTTGTGAAAGGGACGAAAGATGTCTAGAAGTTGCCAAGAAATATTATCAGCGCGCTGG  
TGTTGCACACAAGGTGATTAATATATGTCTCTTCTTGCTTGATGAGGTCGGTTCATTATA

ATCAATGAACTACATAATTTTCTGTATTTGTAGTTTACTTCTAGATTCTTGGCTAGAAATT  
TACAATCAATTGCATGTGATGTTTCAGTAGGTTGGAGAACTTGTTTTTGATACAAAGCT  
AAAATTCTTCCAAGTCCCAAGTTCCCAACCATAAAGATCATGGAAAAAAATTTGTTCA  
GAAGCAGGGCAAAGCCTTCTTTTTAGTTTCACTAATTCCCCCTTTATGTATTATTTATTTT  
ACATCATTGCTCTTGTATTTGTTTCACTTTTTACTGACTTATGTAGCACACTATAGTTTAT  
GAAATTAGGAGTGCCGCCATTTAATGCATCACATTTATTTTGTAGGGAAACTAATCTGTG  
TAGGTTTAATCTATATTTATTTTCTCTTTAATGATTTGTGAGCACTTAAAACTGAAATGTT  
GACCTTTTTTTTGGAAATGCCTAGAATGTATAGCATATTAGTATTCAAGGACCGATTTGTATT  
CTTGCAATATTAGATTTTCTATGCTGATCTGTCTTAAAATTGCTTAGGTTGATGTCAAGCAC  
TCTTTAGCTGTAGATTCCCTAAAGTTGTTGCTCGATTGTGGTGAAGCTTTCAGGTATAGT  
AATTTTGGTATGGTATAATCCATCATTATATTAGTTGACCTCTTGCATGCTCTAACTAATCT  
TTTCCTTTTCTGCTTTTTTCTAGTTATGACTTTGCATTCGTTGATGCAGACAAGAGAATG  
TATGAGGAATATTTTGAACCTTCTACTTAAGCTAGTAAGATTCAACATGAAGTTTACCTTG  
TGGGTTATTTATAACTCATTGTGGTTTACAACGCATGTTTTCACTCTCTGTTCCCATAGT  
GTTTTTTTCATAATATTATAGAAGATTCCCCATTCTTGCCATAAGTTTTATGATTTTATCTA  
TACTTTCCGTACATAGTGATCGTAGTACTTATGCTTTTTATATGTTGAACATTATGTTTTTG  
TTGTGTTGTAGGTAAGAGTTGGTGGTTTAATTGTAATGGACAATGTCCTTTGGTACGGA  
AGGGTTGCTGATCCGCTAGTAAGTTCTGTTCTCTTTTTGAGTTTTGACATGATAAAGATG  
TTACAGGGTAGACATTAGGTAACACTTTTCTCTGGCATTTTTTCTTAGGTGAATGACGC  
AAAGACAATCAGTATAAGGAACTTCAATAAGAACTTTTGGAGGATAAACGTGTCAAT  
ATCAGCATGGTCTCTTCTCTCTCTACCTCTCATATGTTTGGTCTACCACATAGTTATT  
AGTCATTACTTGCGAATGTTGATTGTGAAGCCTTAGAAAATATTTTATATGTCTGCATATT  
TATTCTGTGCGCTAGAGCATGTGAAGAGCACCAACAATGATGTGTAGCGGCACTGCAAT  
GCCAGCACAGTAAATATCCCAAATTCGAAATTTTTATTTGCCTAATAATGTGGCACATTC  
AAGCCATGGTCATGTATACCTGTTTGGATGGGGGGTATGGATTGCAATCCTTAGGATTTA  
GTTCAAATTTGCACTAAATCCCAAAAATTCACAAGGAAATCCCCCTCATCCAAACACCC  
CCTAAATGTGTTGTCCTCTTCACTATCTTTATAGTTGTTCAACTGCTTCAGAACCTTTATA  
ACCCCTGTATCCAAACCTTCTTTTTGATACACCATCGTTTGGTTTTAGTACAACCTTCTGT  
GAGAAGAAAACGGTATGTGTAACATTGCTCCAATTACAAGTGTATTCTTGTAACCGTAT  
GCAATGAGAACCATAATATTGGTACCATTAGATTTTCATTTGACATGCTTATATCATGAT  
TCAGTGCATCATATCCCATGCCCTTCTCATGTGTTGTCTGTTTCATACCACCTGTCTGTGC  
TTTAGTACTGGATCTTAATTAACAATGGTATTATATTTTGGAGAAATTTGCAGGTGCCAAT  
TGGGGACGGATGACAATTTGTGCGAAGCTAGTAGATACTCCCCTTCCGAGGTCAAGC  
TCTCAATGA

>DfCCoAOMT5 (DfaA07G014340)

GCTCTAGCTCATCTCGACATGAGGCTTATATTTACGAATGCGTTTTGCAAATAGTCGAAA  
CTCATATGTTGAATTCTAGTAACATGGGACCATGCATTGCAAATGTGTTTTCTAAGTGCT  
TGAAGTCCATGCACCTACTCCTTGTGGCATGATCTAAGTTTGCAAATGTGTTTGTA  
GTTGGAGATCATGCATTATCCCTTGGCATGGTCTAAGATTGTTTATTGCTATTTCTTAGA  
CTTGGAACCATGGTAGTGACTCCTTGGATGTTCTTTGATTTCTGCATTGATCTACTGTATTT  
GAGGTTATGCAAATAGATGGGTTGTGTAGCATCAGGCACTTCGCCGCGTCGGACATCTT  
CGCAGCATCATGTCTGCACTCGTCTCCGCGTCAACTCTGCATCGACTCCAGGCCGCCA  
GGCCGTGCCGCGCCGAAGTCTTCATCGAGCGATGTCGTCGCGCGTTGGCCGAAGACTC



GATGTCTCCGCGCGCTGGCCGAAGACTCATGTCCCGCTCGGGGTCCGTGCCGACGCGA  
AGTCCCCGGTCGCCGAAGCCCCCGCTCGGAGTCCACGCAGGCACGTCTCCGAAGTT  
TATAATCCAGGCATGCAGCACCTTCGCGTATGCATGCAGGGAAGCATTTCGTCCACCCAT  
GCATGCAAATAACTATTACGTGTGATCATCCATCCGTCCATGTATGCATTGTATTTGTCA  
TATACTGCATGCAGGAAAATACTCCAGGCGCCTCTACGTATCCCTCGTACACGTGAGTT  
CGTGGTCCAGCTCTCTGCGAGGAAGCGCGCGGATGGGTGGTGGCCCCCTCTCCGGATGC  
ATCATTTAGTGTGACCAAGCCATTAACATATTTGTCTTCTAGCGCTTGGAAGTCCACTC  
TTGAAAGTCTTTTAGTTGTTAAGAGTAGGCCGAGATACTTCAAGGGGAAGGACACAAG  
CTGCACAGGTAGGTCTCTGCAGAACCTCTTGTAGGTCAATGTGGTCGCAGTTGATTGGC  
ACCACCTAGCTCTTGTAAAGTTGGTGTGAAGGCCTGTGGTATCCCTGAATTTTTGTAGA  
ATTATGACCAAGGTGCAGACGTCTCTTTCTTTAGTGCTAGAAAGATGGCAGCATTGTC  
CGCATAAAGGGAGGCGCGAAGGGTCGCCGCACGGCCCCCTAGAGGTTCGTAAGCCCC  
AAGTTGGTTTGCAATATCAAATATTTTCTTCAGTGGATCTATAACTAGGATAAAAAGGAA  
AGGGGATAGGGATCCCCTATCGCAAGCCTCTGCGGTGCTGAATATATTTCACTAGGGATC  
CCGTTTAGGAGGACTGTAGAGGTAGCGGTGGAGAGAAGGCAGGAGATCCAGTCTCTT  
TATCACAGTGGAATCTCTTGTCTGTAAACAGGTTCGAGCAGGTATTCCTAGCGGACCGA  
GTCAAATGCTTTTCGTAATATCAAGCTTGAGAAGCAGGGACAGGGTTATGTTTCGATGGT  
GTCTTTTAGCTAAGTTGCGGATATAGAGTTAGTTGTCTTGGATTTCATCTGTCTATGATGA  
AGGCGCTCTGACTTGAGGAAATAAGATCGTCAATGAAGGGTGTTAGTCTTAGAACCAA  
GATTTTTGCTATAATTTTGGATACGTTGTGTATAAGACTAATGGGCTTGTAGTCTCTTGGC  
AACCGTCCCTTTTTTCGGTGGGCCATTTTTCTAGTCAATCCACGACAAATTGGCTGGGT  
AGATTGCGGCTGATGTGGTGGTAGGAATGTGATGCGCATGGACTACCACGACGGAAGG  
ATGGGCACGCAAAGACTAACGAAAAACGCCTTGCGTTACACATGCATTGATCTAATTG  
GTCGGTCAACAATCAAAGCAAGTGATTTATTTCTTTTCAAAAAGGAAAAGAAAAGCAG  
CACCTAAAAGCAAGTGATTTTCCATCACTTGATAAATTAATACAACACGCCTAAGCTGT  
GGGAGAGAGCTCAGGTAGGCAGCGCAACGAGAGAGACACAGAGAGAGATCGAGCC  
**ATG**GCGAACGGCGGCGACAGCGTGCCCAACGTCCACAGCGACAGCGACAACGACAG  
CAACAGCCACACGCTGCTCAAGAGCGACGCCCTGTACAAGGTAACACGCTAAACACG  
CAGATAGTACGTACGACGAGCAAGTAGTGAACGTTTCGTTTCGTTCTTTCTTGAGAAGGA  
CTAGGGGACGCTACCGTCCAGCCCTTCGCCGCCGTCCGTTCGCCAATCGTCCTTCGCTGT  
CACCCACCACTAGACCACCGCCAGACCGCCTCCTAGGTCTCCCTCTACGTTTCAGGGGC  
ATAGTGAACCAGTTGGCGACGGTGGAGGAAGAGGCGTCGGCTGTGAGTCGTCGTCGT  
AGCCGAAGCAAGAGGAGCAGGCGTCGGCAAAATTTCTTTGTATGAGAGGAAAAGAGA  
TGATAAGCCGTCGGGATGGAATACGATGGTGTACCGTTTTCTAGCATCTCTCTTCTTTCT  
TTGCTGATGGTGTTCATGGTCGTTGCCGTTGCCGTGCAGTATGTTCTGGACACGACGGTG  
CTGCCGCGCGAGCCGGAGTGCATGCGCGACCTGCGCCTCCTCACGGACAAGCACAAAG  
TGGTACGTGGTTTACTTACTAGCCTCTCGCGTGTTTTTTTGTCGTTAATTCGATGCTGTT  
CGGTTGGGTGTGATGAAATCATGGCATGGTGTCTCAGGGGGTTCATGGCGTCGTCAC  
CGGACGAGGCGCAGCTGCTGGGGATGCTGATCAAGATGGCCGGCGCCAAGAACACCA  
TCGAGGTGGGCGTGTTACGGGCTACTCGCTCCTGGCCACCGCGCTCGCGCTCCCCGA  
CGACGGCAAGGTGGTGGCCATCGATTACGACCGTGAGAGCTACGAGGCGGGGCGGCC  
GTTTCATCGAGAAGGCCGGCGTGCGGCACAAGGTGGACTTCCGCGAGGGCGCAGGGCT  
CGAGAGGCTCGAGGAGCTCCTCGCCGAGGAGGCCGCGGCGGGGCACGAGGCGCGGT  
TCGACTTCGCGTTCGTGGACGCCGACAAGCCCAACTACGTGCGGTACCACGAGCAGCT

GCTGCGGCTGGTGCGCGTGGGCGGCACCATCGTGTACGACAACACGCTCTGGGGCGG  
CACGGTGGCGCTGCCGCCCCGACGCGCCCATGTCGGACCTGGACCGCCGGATCTCGGTC  
GCCATCCGGGACCTCAACGCAAAGCTCGCCGCCGACCCGCGCATCGAGGTTTGCCAG  
CTCACCATCGCCGACGGCGTCACCATCTGCCGCCGCCTCGTG**TGA**

>DfCCoAOMT6 (DfaA07G014350)

TGGATGGATGAGGATTACCATTTTCAATGGGCTTGGGGCACTTGGAAAGAGAATGTCC  
AGATTCACCACAGTTACAGCAGAATTTCTTCAAATTCCCATCACTTTTCTCAGGGCAAT  
TCTTCAGACTATGCCCCGCCGCTCGCTGCAGAGCAAGCAGATCTGAAAAAGAACATAA  
CATTATTACATAGTTAAAGATAGTGAAATTGAACGCTTGCAAATAGAGGAATCGGACA  
TAAAACCAGCTGATGAAAAAGGACATGACCAAACACCATTTACTCTCTGAAACATTTG  
CCATTTTACTCTCTGAACATTTGTTTCATCAATACAATCCATTCATACGACAGCCAGGAGA  
TGCCAGATCATATACGCACTGATCAAAGTGGCACATGTTTTCCAAAAGTTACGTTTGTG  
AGTTTGCATGGTAGTCATAGCTCATTGCTCTCACGGAACACACACACACACACACA  
TAGTCCTTGCCTAATGAAAATCTCACCCAGCAACGTCAAACCTAAAGGAAAATCATCATT  
GCTTCTGCCGTTTTCTACGGTTCTAATACCCCCAACAATTAGTACCAAAGCTGCTCTAA  
ACGTAATCCCCAGGCCAGCTTATAAAAGACAGCATTTTCAGCTAAGTGATGGTGGGCT  
GGTACATTGTTCTTGTTCAGAGGGCCTTCTTGGGGCAGGCCTTGCGGACGTGGCCGG  
CGGCCTTGCAGATGAAGCATCGCTCCCCGGGCCACATCCCGGGAACCCGCAGCGGGT  
GCTTCGACCTCCCCGCGCCGCCCGCCTCCTTGAACATGCTCTTCTTGTCTTCTTCTTG  
GTGCCGTCGGCGGGAGGGGCGGGTTTGGGTGGGAAGAGGTGCGGGTTTCGCTCGCGG  
AAGCGCTTCCGCAACAGCCGCTGACGCTGGCTCACCATCGATTCAAGATTGCTACGGC  
CGCCTTTCTCTCTCGCGCGCACGTGTTGAGACTTGAGAGACGGGGCTGTAGTGCCGGC  
CAAGACGGCAGCGCCATTGGGGATCGGGAGCACGGCCGGGGGCCAGGCCAGGGGGA  
CGACGACACGGGGAGGACGGGGCGCGGCAGCGCGGTACACGGGGCTGCGGTGGCGG  
CCAAGACGTGCGCGGTGCGGGGGATCCCGATTTGGGAGGACGGGGCTTAATAGCGTGA  
GAGGAGGATTAGGGATTGCGGATTGGTGATCGACTGGCGTTCACGATCGGGTATTCCG  
GTATAACCTATACGATTGGGCCTTCGTAGTCCCGCGGCGATGCACGAGCCAAACCAGCC  
GCGCGAGTGGCTCCAAGCTCGGCTCGATACGGGCTCGATTTGGCTCGAAAAGTCACGA  
GCTCGTTAGAGCCAAGTAGACTCGTAAGTCTCCAACCTATTTTTTTCAGTCTTACTTTACAT  
TATTGAAATCTCCATGTGTAAAATATGCCACAGACCTGCACTCGTCGGATCGGAACAA  
AGGCAACGTGCCAACGTCTAATCCCGACCAGATGGTCCACAGGCCAAACTGCATGCGC  
AAGCTCTCTCCCCGCAAAAGATCACAGAAAGCATTCCAAACAGCAATCACTCCTAATT  
TTTGA AAAACCAAAAGCTATTTAAATGTGTTAGATGACTTTTTTTGGCCTGTAGCTTGT  
GGCTTAAATTATTGAATTCTGGTTGTTTCGTGAGAGGTAGTCCATAGAGAAAAATAATCA  
CATACGATTTTAGCTGGTACAGCTGAACTCAGTATACCTTTTATTACAATCTTCCTGTTG  
ACCCCGTTTTGAAAAAAATACATTGTTTGAAAGCAAGTCACTATAACGTAAGTCATATG  
CCGCAAGTTATAAATGAAAAAGAAGTCACATGTTATCTTTTAAACATGTTTTTTTAATTG  
TTTATAGGGACAGAATGATATTTTTATTTTTTTTCTATTTTTTTAATGGAAAGGTCGAGA  
GAAGGCCGAGTGGCGCAGCCCGCATCTCCAAGCATAAAGACGCGGGGGGGGGGGGG  
GGGGGGGGGGTTGTAACTCGACAAAGGCATCGTGCGGCCGCAAAGGAACGAAGCAC  
TGAGGTAATTTTGGCAGTTTGCGGAACGAAGCGCTGAGCTAGGCTGGCAGCCACTTGC  
CGTTGTACTCGCGCTTTATGCTCTGCGTTTGTTACACTTGTGATATGATCTGTCTTGTAT  
CTAGAGCAGTGAGTGCTTCGGTTCTCCTGCGCGAATCGCTCACCGGCCTAGCACGGAC

**ATG**GCTGCGAACGGCGACGCCGGCGGGCGAGGTCAAGGACATCCACACCAACGACAG  
CACCAAGACCCTGCTCAAGAGTGACGCCCTCCACGAGGTACGCAGAATCATCCATCCC  
TGAATCGCAGTTTCGGCGCGTGGATCGATCTGCAACGCCTTTTCTTTTCTTTTCTCTGTT  
GCAGTACATGTTGAACACGATGGTGTACCCGCGGGAGCACGAGTGCCTGCGCGAGCTC  
CGGCTCATCACCAAGGAGCACACCTAGTACGCGTGGCTAATTAATTCGTTTCTCTTTCT  
TTAATCTCGCGTGATTAGTTTAATGTTTCCATGGATCATGGTGGATTGATCTGGGGTTGT  
TTTTTTTTTGTAGTGGGTTCATGTCGTCGCCGCCGGACGAGGCTCTTCTGCTGTCGCT  
GCTGCTCAAGGTGATGGGCGCCAGGAACACCATCGAGGTCGGCGTCTTCACCGGCTG  
CTCCGTCTCGCCACCGCGCTCGCCATCCCCGACGACGGCAAGGTGGTGGCGATCGAC  
GTCAGCCGGGAGTACTTCGACCTCGGCCTGCCCCTCATCGAGAAGGCCGGCGTGGCG  
CACAAGGTGCACTTCCGCGAGGGCCCCGCGCGGCCCATCCTCGACGAGCTGCTCGCC  
GACGTACTIONAATAACCGCCGCCAAGTCATTCTTGATGCAATGCCGCCGGCCCCGTGGC  
TTCAACGGTTGCCATAATTACTTGCTTATCGATGTGATCTTGGTGGGTGCATGCAGGAA  
GGAAACGTGGGGAAGTTCGACTTCGCGTTCGTGGACGCCGACAAGGGGAACACTACGTC  
AACTATCACGAGCAGCTGCTGCGGTTGGTGC GCGTCGGCGGCGTGTCTGCCTACGACA  
ACACGCTCTGGGGCGGCAGCGTGGCGCTGCCGGACGACACGCCGCTCACGGAGGACG  
ATCGGGAGATCCGGGGTTCATTACGGGCGTTC AACGCCAAGATCGCCGCCGACCAGCG  
CGTCGAGGCCGTGCAGCTTCCGGTCGCCGACGGCATCACTCTGTGCCGCCGTGTCGCC  
**TGA**TCCGTGCTTGTCTGGCGCGCGGCGCGATTGCGAAGTGTGTATGAAATATGAATAA  
ACAATTGTGTGATTGTATCAACATCCAGGTTTGCCTCGCCAGTTGTGGAGTTATTGATGT  
TATCTATTCATCGAAGAACATGTTGGTCTATGTAATGTCATCTGGTAGCTGCTTGCTTTGT  
TGATTTGATCTATCATGATTCAGCTTCTCTGGTCTAAAATATGATGTGAATTGTGATGGAT  
CTTTTCTTTATTGTAACATAAATATGGTAATGAAAGATGTCAGAATCA

>DfCCoAOMT7 (DfaA07G014530)

ATTAAACCAAATTTTCCAGATATTTGAATTCGCATTCAAATAGAATTAACAAAGATATG  
ATAGTATGATTACAGCAAAACAAAAGTTAGATTTAATGTGCAAGGAACAACACGGCTGC  
GCATCACAATAAAATGTTTCCACATGAATACGCATGTGAGTGCGCACGTGCATGTGTG  
TGATTTTAGCAATTGTACTIONTATGCCACCACATTATATGTGTCACATATTTAAAGGGTAGC  
AAAAACTCTAGTTTATATTACACTCCTACTTGTACAAGCAATGCGGGACTAAGTCATAC  
TATAGAATTTT TAGGAATAAATTGGCATAACACTCGTGGGTCCAATACTAATAAGTGGTC  
GGCGAGTTCACTGGTCACTCGCCACTGCCCTCACCTCCCCGATGATAGCAAGGTCATT  
GCGATCGACGTTAGCTAGGGGTACTTCTTGTTACAAATGTGGGTAATTTTAAATCCAA  
GTTTTATGAGGAGACAAATAACAATAAATACTAGTGATGCAAACTTACTACTAACAGCAGG  
CTACTCATCACTTCAGAATATAGTCAAGCAAAGTACAGTAAGAAAGTCATACGTGTG  
CGCGAACGACTTACTTGTTAGCCTGAAGAAGAACAGGAAGCCGCGCAGGCTTGACGC  
AGTACAGATCGTAGATGTCGCAGTGCAGTGAGCGGTGCGCGCAGATGCGCTACGCAGAA  
ACCTTATTGCCACCCCGTGCAGGTACTCTCTGCGGCAACGGTTCGGAGATAGCCGCTCT  
CCCTCCTTCCAGGTGCATGCCGGGAAGAAAGGTCGACGAGGTTT CAGACAGTACAGTA  
CTTGAGCACAAAATCACAGGGAAGATGAAAATGGAGGCAGTGAGATTCTCTCTTTTCT  
GGACGTCTCCAGGCATATATAGACAGACTGATAACTGGCATGATTAACAGCCATTTA  
CCCCTGGTAACTGGCACATTCAACCAGCCATTTATGAACTAGTAACTGTCTATCATCA  
AAACCCAGTAAAGCCTCAAATTCAAACGTTTGAATCTCATTCAAACAAAGAGGAGGT  
GCAGGGTTCAACAAAAATAAAGATGGACTTGATCTGCCAAGTGGCGCGCCACGTCAC

GGCACAGTCGCGCGTCGCTAGTCACAAGTCACGCGATTTTCATGCGAATATGCGTGCGC  
ATGCGTGCGCGCGTGTGTGATTAGACAGAACCTTACGCATACCATCTCTATCCATATTCA  
AGGAGTGGTAAGGATTTACCTTATAAATCGGTCTTCCTCACCTTTCCTTAACAATATGG  
TACTAACCATGCATGCTTTGGAATTAAGGAAATGAGCCATAAATAAATGGGCCAATTTTC  
TAACACTTCCACCCAGGCCTACCTGTCATACAAAAGTGTTGGGATACGATAGGTTATAC  
TAGTGCAAATTAATAATTTCTACCGCGTAAACTAGAAAGCCATATGAGTAAAAGATAATA  
GATCATTACCACTAGACGCGTAGTGTAGCGGAAGAATAGTCGAAACAGCCTAGTTCAA  
CGTAGCAGGTATCAATATAGTGGGAGTAGTCGATTATCCAACGTTTGTGAAAAGCGATA  
TTTGGAAGCCAATTGATCTCCATGTGCCAATTGTCTTTTCGTCGAATCATCCCGATTAGT  
GTTGCAGTTGCATCAGCGCTTTACCGAAGTCCACACATCTAGGGATGGAACATTGTGC  
GCTGGTGTGCTAGCACTAGCGCACACAGTAAGGTCTTTCGGAAGGAGATGGCTGGGGT  
TTAGTAGGTGGTGCAATGTCTCTCACTGTCTCACACATAAACCCATAGCCACAATACTC  
CCCTTATGTAGAGCCTCCAGCCGAATCATAATCCAACATGAGTAGAGATTATATCCTACT  
TGGAGAGCGTTCAACGAGATCCTTATCCAATACGAATAGATATTGTATCCCATTTGAAAA  
GTCTCCAACCTAGATCCTTTACTGTTCAAATCCGTTAAGTGTGTGACCTTATAAATTC**ATG**  
TATATTTTGTGTACCCAGAAAACATCTTTCCTATCACTAGTCGGTAGCGGTCCATAGCA  
GAACATATTGACTCTAAATATACACAAAGATCAATCTGGATGAACCTTATGCAATATGAT  
CTGCAACTAAGTCTTGGTCTCTCACAATTAGTTCGTAACCTTTTATGACCAAATCGTATC  
GCTTACGACTAGTTTATATCCCCATACGACCAGTTCGCTGACTATTTTATGATATGTTTGA  
CTAGCTCACAAACCAGTTAGTATATCCATACGATCAATTTCGTGTCAGATCAGACTTAACG  
ACCTGTTTCGCATATTTTCTTTTACCTCACGATATCTGATCGAACTTCAGATGAGAAACA  
TATCATTATGACTATTCAATCTTTTTCCGATCTAGTGATAGATAACTTCATGCAGTCGA  
CTCTTCAATCACTCGTGGTATGACCATGCATATCCTTTATCTAACCACATCGAGGGGTCC  
AGAGATATCTCTCCTATTATGTAGGAGGGGTAAATTCCATATTCGATCAGTCATATTTCTC  
CGCATGTTTTATAGCATACCCGAAAGATATCTTTATAACTACCCAGTTATAGAGTAACGT  
TTGCTTGAGACCAATGATGGCATATAAAAATACAATACCATGTTCTCTAACATATGTCT  
ATATTATTAATGTGATATTCTATATCTATGATTGGTGAAAGGTGGTCATCAATTAATATATG  
TGCTGGTCTATAGGTCATAATGTCCTGATTAGTGACATCTGACTAAAGATCTTTTAGAA  
TAACACCATGATAAAGAGCTTCATTAATAAGTCATATACTTGCTAATATCTATAAATGATA  
ATTTGTTCAAAGAACAAAATAATAATTATTAATAATCATAAATATAGTAATAGTATAAT  
CAATTTTATGATCGACTCTAGAACATGTGCTAACAAAAGGCTGGCATCGCTCACAAAG  
CCGACTTTCTGCGAGGGAGCTGGGCTCGCACGACTCGAAGGGCTCCTCGCCGAGGAG  
GCTGCGGCGGGGCAGAAGCTCGGTTTCGTGGACGCGGACAAGCCCAACTACGTGCGGA  
ACCACGAGCAGCTTATGAGACAACACGCTGTGGGACGGCACGGTGGCGTTGCCGCC  
GACGTGCCCATGTTCGGATCGCGACAGGCGGTGCTCGGTTCGTGACCAACAAGCGCGTC  
GAGGTGTGCCTGCTCGTCATTGCCAATGGCGTCACCATCTGCCGCCGCCTTGTGTGACC  
GACACGAACAGTGGCCACGACTCAACGTTTCGGTGGTTTCAGTAAGATTTACGAGTT  
GAGGGACTGAGGGTGAATGTAAGAGTGATCGATCACCGTGTTCGGGATCGACTCCTTT  
AAAAGTTAAATAGCTTCACGATCATCAGCTTATGAGATGGAAAACTGTGTCAAGAA  
AAACGTATGGTTGCCAATGCAAAATGGGTGCAAGCATGCAAACGTATGGTTGGCTCGT  
GCGCCCAGCCTATCAGGCCGAGGCGGCGTACACACAGGCCGAGTGAAATGAATTCCTC  
CCCAAAAAAAGTGCAAGTCGAGAGAATCAAAAGGCCTGCAATGGCAGCCGATTCTCG  
GAGTATCAGGTAACATGCATAGTGATTGAAGGCTTTCCTTACATTTTAGTTAGCTTTTA  
GCTTCTTGCCACACGAAGAACAAGAGTGGGACTCATGATTTTTTCCTTCCGGGGGA

AACTACATGAAACTTCCCAAAAGTAGGCACTGAAATTTTGAATTTTGTCTGTTTATGG  
TACAAATTACGGAGAGAGAGATTTTGAATTTTGGCTGTTTACGGTACAAATTTTGA  
ATTTTGAATTTGGATGATACAGATGTTAGACTTTTAACGTGTACATCGTTTAACTTGT  
AGACCCCGTTTTAAGAAAATGCTCCGTTTGAAAGTTAGGTACTATAGCAAAAGTCAAA  
AGCCGTCAGCTTCGGAGGAAAAAACAAGCCTGTAGTATCTAGTGCACATCTATGTT  
AAGACATGGTATCATGCCCTGATACAAGTAGTTATGACGGCAACATAAGTTCCTATTGTA  
GGCTGGATCCGGTTGTAATACCGTACAGCCCAAGACTCGCTCAAACCCAGCTCCCAAG  
TGGAATGGGCCTACGCATGTGCAGCAATCGTTTCCATTTTCTCATCGTTTTGCTTAAAA  
GGCTTAAGCTATTGTTTTGGACGAATAAACATTATATGATCATTTAACTCATTTCAAATTG  
GTAGTGTGGTGGTTCTAAGGGACATGATATTACACCCGTGTTATGAAACACGATCTGAG  
TGCACATGATGATGTGAAGAACAAAAAAGTGCCAAATAATAGCAACTAATTAAGCAAC  
CACAGCAAAAAGGAAAGAGTTAGCAAAGCAATTAGGTAAGCACTACTTCGAAGGGTC  
ATAGGTTCCCGTCCCTACTTTTTTTAAAAGAAAAAAACTATCCTTCCCGTTCATATTTT  
CTGCTGATGTCCACAGCAAGTTCAACAGCAGTAACAAGACGCTGCTCAAGAGCGAAG  
CCCTGTACCAGGTAATACACTAAGTAACACGACAGTGACACACCTAGCTATGTCAAGA  
ACATTCGACGAGTCAGTGATCGTTCGTTCTCTTTTTCTGCTGATGATGATATGGCCA  
TTTGCCGTCGACGTGCAGTATATTCTGGACACGATGGTGCTGCCGCGCGAGACGGAGT  
GCATGCGCGAGCTGCGCCTCCTGACGGACAAGCACGAGCGGTACGTACTGCGCGCGC  
TATACATCTCACTCGTTTTTAGTAGCAGTCGCTTTTCACTTGCAATTGCCAATTTGCCAG  
ACATGCATGATGGATGATGCGTGTTTTTTTTTGCTTAATTAATTTTGCTGTTGTTTGGTCT  
GTGTGATGAAATACATATTGGCATGTGTAGGTGTTCCATGGTGTCGTCGCCGACGAGG  
CCCGGCTGCTAGGGATGCTGATCAAGATGACCGGCGCCAAGAACACCATCGAGATCGT  
AGTGTTACGGGTCACTCTGTCTCGCCACCGCGCTCGCGCTCCCCGACGACGGCAAG  
GTGGTGGCGATCGACGTCAGCCGGGAGTACTTCGACCTCGGTCTGCCCCTCATCCAGA  
AGGCCGGCGTGGCGCACAAGGTGGACTTTCGCGAGGGCGCCGCGCTCGCGAGGCTCG  
ACGAGCTCCTCGCCGAGGAGGGGAACGAGGCGCGCTTCGACTTCGTTTCGTGGACG  
CGGACAAGCCCAACCACGTGCGGTACCACGAGCAACTGTTGCGGCTGGTGC GCGTGG  
GCGGCACCATCATGTACGACAACACGCTGTGGGGCGGCACGGTGGTGCTGCCGCCCCG  
ACGCGCCCATGTCAGACCTGGACCGGCAGCGCTCAGCCGAAATCCGGGATCTCAATGC  
AAAGCTCGCTGCCGACAAGCGCGTCGAGGTGTGCATGCTCGCCATCGCCGATGGCGTC  
ACCATCTGCCGCCGCCTCGTGTGA

>DfCCoAOMT8 (DfaA07G014550)

TGATCGGTCAACAATTAAGCATGTGATTTATTTTAAAAGAATAATTAATACTAAAGC  
AGTGGTTTAAACACACAGGGAGAGTAATGGAAAGAGCGATCGAGGGATTAACCAGCAA  
GTCTCTTAGAGTCGATAAATATCACGCCGAGCTTGTGGGGGTTGTTGGAGCTAGTGGG  
GGTGGGTCCCGCACAACTGCACAAGCTAAAGCGGAAAGAGCAGCGAGCGATCTACGG  
CGACCGGCGGCGACAGCGTGCCGAATGTCCACAGCAACATCGACAGCGGTAACAAGA  
AGCTGCTCAAGAGTGAAGCCTGTACCAGGTAACACACTAATTAACACGACAGTCGACA  
CATCTATGTCAAGAACGTACGAGTCAGTGATCGTTCGTTCTTTTTTGGTGGCCGT  
CGACGTGCAGCGCTTGGCGGAGAGCATGGCACGAAGGTCATGTATAGACTGAACGAA  
GTCCTCGGCGGAGACCATGCGAAGTCTCCACAGAGGAGTTAGAGGCAACATTCACATA  
GAGCTTAGCGAACATCATACGAAGTCTTGTGAAGACCGGACGAAGTCTTCGAAGACC  
AGGTCAAGTCCCCGCAGATAAGTCGGAGACGACATCCGCGCGGAGTTTGGCGAAGGC

CATGCGAAGTCTTGCAGAGCCCGGACGAAGTCCTCGGCGGAGATTGCGCGAAGTCTC  
TGCGGAGGAGTCGGAGGCGACATCCACGTGGAGCTCGGCGAAGACCACACGAAGTCT  
TGCGTAGATTGGGCATAGTCGTCAAAGACCGGGTGAAGTCCCAGCGGAGAAATCGGC  
GAAGTCTCGGCGGAGACTATGGAAGATCCGTGGAGGAGTCAGAGGTGACATCTGCA  
CAAAGCTCAGTGAAGATCATGCGAAGTCTTACGGAGACCGGGCGAAGTCCCCGCAGA  
GAAGTCGAAGGCGACATCCGGGCGGAGCTCGGCGAAGACCATGCAAAGTCTTGCAGA  
GCCCCGAGCGAAGTCATCGAAGACCGGGTGAAGTCCCCGCAGAGAAGTCGGCGAAGC  
CCTTAGCGGAGATCATGCGAGTCGGAGGCGGATGTTCCGTCCCCAAGTGTCAACCACA  
GAGAAGTCGGCGAAGCCCTTAGCGGAGATCATGCGAGTCGGAGGCGGATGTTCCGTC  
CCCAAGTGTCAACCGCAGAGAAGTCGTGCCTATTGGCAAAGACCAGACCACAACGCG  
GTCAGAGGTGTCACCAAGGTCATGACCGTGGCGTGGTCGTGGATGTTGACGCAGCCG  
GCGGTGGGGCAAAGACTTTGGAGTGTGAGCTCCGTGCAGGATCCCCGCCGCCAGAGA  
GGCTCGACATTCACTGGCGTTGCTCAGAGGCCGACTCCTTGGTGTGGAGGTGACGGCG  
CGGGCATCGCGTTGACGGTCGCACCGGCGTAGGCGTCGTGGTTGACGGTCGTTCCG  
CTGCATCTCTCTGTCTGCTTGGGTGCCATCGCTTTCTAGCATAGTTTCTTGCGCGGTCCCC  
ACGGATGGGTACAACAGTGGGTACAAGGTACCCTTCTTCATAGGAGATAGTTAAGAGA  
TATAGGGTGAGAGAGAGCTGGTGGTAAAATGAGTCAATCTCCCCCTCCTCATACTCCTCT  
TAGGGGTTTATATACATGAGTGGAGTAGGATGTGAATTTTTTCATCCTACCTCTTAATAATT  
ACAAAAGGTAGATATATATTGGTATATTTCTCTACATTATTTGGCACATTACATATTAGAC  
TAATAAGATCCAGCCACGGAGGGTTAGATCACCCCTACAACAGTAAGGATGAAAGTGT  
AAACACCAATAAAATAGCTTAAGCGTTGATCAAACGCCACCTTTGATCGGTCAACAATT  
AAAGCATGTGATTTATTTTTAAAAGAATAATTAAATACTAAAGCAGTGGTTTAACACAC  
AGGAAGAGTAATGGAAGAGCGATCGCGAGAATCAGCCCGCGGTGCCGCACAACCTGC  
ACAAGCTAAAGCTGAAAGAGCAGCGAGCGAGCCATGCGGACCGGGCGGCGACAGCGT  
GCCGAATGTCCACAGCAACAGCGACAGCGGTAACAAGACGCTGCTCAAGAGCGAAGC  
CCTGTTCCAGGTAACACACTAATTAACACGATAGTGGACACATGAAATCTATGTCAAGA  
ACGTACGACGAGTCAGCGATCGTTCGTTCTTTTTTTGTAAGCGTCGACGTGCAGT  
ATATCCTGGACACGACGGTGCTGCTGGGCGAGCTGCGCCTCCTCACGGACAAACACGA  
GCGGTACGTACTGCGCGCTATATATCTCACGCTCTTTTTAGTAGCAGCCGCTTTGCATTT  
GTATAGTTGCATTGACATCAATCATATGTCAGTATGTGGTCATTAGTCTTCTGTTGTTTGA  
TTGATACGAGGCCAGCTGCTGGGGATGCGGATCAAGATGACCGGCAATATTTGTGGG  
AAATATTTTTAATTTTAAATACTAAAAGGTGGCATGTATTATAAAATACTAGTGATACGAA  
ATTCATAACTAAAGGCAGCAGACGAATCATATTTGTACTTTTAATATACGCAAGAACAG  
AATTATAATAGAGTCGGTCGGTCGGTCATACGAATAACGTACAATGGGTTGATAAAGAA  
AATGGAAGAAGCACAAAGACGTGCGGTCGTGAAAGTAGTCGATGAAGAAGACGGGC  
GGCCGCACAGGTTGCGCTGTCTAGAAACCTTATTGCCACCCTATGTAGGCACTCTCTGC  
GGCAACAACCTTGAAGATAGCCATTCTCTATCCTTTCCAGTGCACGCCAAGAAGAAAGA  
CCGACGAGGTTTGATGACTCAACACCCTAGCACAGTTCACAAGAGGGGAAAAGATAAT  
GTGAGATAGGAATGGATGAATTCGATGTCACTAGCGTGGACATCTGTAGGTCTTTTATG  
GATGTTTTTTTTTAGATAATGGAAAATAATTTCCGGCCTCTGCAAGCGCACACAGCCAAG  
TTCTTACAAGGTGTTTCACTAATTGCTGTAAAAAAAAGGAAACGAGAATACAAGTTG  
ATCAAAGTGATTAAGCAAAGTCTATTATTGCTCCTCCATCCGCTCTTGGCGAAAAAG  
TCCAATGTGACAACCTCCAGTGCTCAGCTCGCCAGTCGAATGGTCTCCTTTGCATCCTC  
ACGCTGCAGCAATGCCAGAACCGCAGCCAGTATGTTCCCCTGAAGGTAGTCTGCATA

AAAGAAATAAATCGTTTCTTTTCAAAAATAACATCATTCCGTGTACACCAGATAGCCCA  
CAGAAGAGCGGCGACACCCAATAAGATCAGCTTTTCGAGCACTATTCCCAACGCCAGTT  
AACCAATTCCCCAGCATATGAGGTATAGACCTAGGAGGGGTTAACCCAGTAGCTATGTG  
CATTATACGCCAGATAGTCTTAGCATGTTGGCAATGAAAGAAAAGATGATTAATTGTTTC  
ATTGCAATTGCAGAAGCAACACTTTTGATTCCCATGCCAATTCCTCTTAGCTAAGTTATC  
CTTTGTTAAAATCACCCCTCTTTGAAGATACCAAAGGAAGATTTTTATCTTCAAGGGGA  
GTTTCAGCTTCCAAATGATAGTATTCACAAAAGGGTAGCCCTGGTTCATAAGATAATTG  
TACATAGATCGTACTGAAAAAATACCATTCTATGTAAATCCCAAGAAAAAAGTCCTTC  
ATATTGGTAAGCTGAATATTAGCAATTTGAGCTACTAGATTAAAGCCAAGCGGTCAATTTA  
TCTCCCCTAAAGCTCTTCGAAAAGACACATTCAATGGCACCTGGTTCATAACATGTGC  
CACTGTGACCTGGGGGTAATGGACTAACTATACAGGCTAGGAAATTGTTCTTTAAGGG  
ACTTAGAACCCACCCAATTATCCTCCCAAATCTAGTTTGTGAACCATCTCCTATCATGA  
AGGTACCACACCCTAGAAAATCTCCCCTAACCTTTAAAAGACCTTTCCAAAAATGAGA  
ATCACCAGGTTTGATATGTACCTGTGATAAACATTTGAACTCAAATATTTATTTTAATT  
AAGGTCTGCCAGGTTCTTCTGCATTAAGAAGTTTAAATAACCATTTACTGAGAAGGCA  
TTTATTTTAAATCAAGAGATCTGTTATGCCTAGACCACCTTGATCTTTGGGGCGACAAAG  
AATATCCCCTTGGAAGGCGGTATTTATGTTTCTCATGATTACCTTGCCAAAAGAATCT  
TGATCGATAGAAATCAAGTGTCTTTAGAACACCTTTTGGTATTTCAAAGAAGGACATCA  
TAAACATAGGTAGGCTACTAAGGACTGAATTTAGTAAAACAAGTCGGCCCCCATAGGA  
CATATGTTTTGCCTTCCAAGTACTTAATTTACGTCTAAATCTTTCCTCAATTACACCCCAG  
TCTGCATTGCAGAGTTTGCGATGGTGCATCGGAATGCCTAAGTACCGGAATGGATATGA  
TCCTATTTTACAACCAAAAAGCTGAGTATATTCTGCTCATAATGCTTTGCCTCTCCATA  
GCAGAAAATCTCACTTTTGTGGAAATTAATTTTATAGACCAGATAATTGTTCAAAAACAC  
TGAGCAGCAATTTCATATTCTTAGCTTGCTCCAAATCATGGTCTATAAAAAGGATTGTAT  
CATCAGCATATTGCAAGATGGACAATCCATCATCCACCAGGTGAGGTATGATTCCTCTA  
ATTTGGCCATCCTCTTTTGCCCTCTTAATCAAAATTGAAAGCATGTCTGCCACGATGTTA  
AACAGAATGGGTGACATAGGATCTCCTTGCCCTAAGACCTTTTTTCGTTTGGAATAGTG  
CCCAATGTCATCATTAATCTTGATGCCACACTACCTCCAGTTACAACTTTTCCACCCA  
ATTACACCATTGCTGGCAGAACCCCTTCATTGCAAGGTTTGTTGTAGAAAGGACCATT  
TGACTTTATCATAAGCCTTCTCAAAGTCAATTTTAATTATGACACCATTAGTTTTTTGGT  
GTGTAACCTCATGTATGGTTTCATGCAAAATCACCACACCCTCCATGATATTTTCGGCCAGG  
CATGAAAGCCGTTTGAGTAGGTTGTACTACCTTACTAGCCACTCCCATTAGTCGATTGT  
GGTGACCTTTGTAAAAATTTGAAGCTCACATTGAGTAAACAAATAGGTCTATATTGTT  
GGATTTTTGTGCCTCTTTAATTTTGAAGTAGGGTAATCACTCCAAAATTGAGGCTG  
AATAAAGGAAGGCGATCTGCAAAGAAGTCATTGAAGAGCGCCAAAAGATCATCTTTTA  
TAATTTCCCAAAGACCTGATAAAATTCTGATGGGAAGCCATCAGGGCCAGGAGATTTA  
TTGTGTTCCATTGGAACACCGCCTCTTTTACTTCTTTATCCGTAAAAGGAGCGATTAGA  
ATGGCATTTTCTCCTCTGTGACCTGTGAGATATCTTGATTTTGATTCTCCAGTAAGCTA  
AAATTGTTATCAACTGAAGGCCCAAACAACCTCTTATAATATTTAGTGATATATGCTTTTA  
ATTCAGCATCACCTCTATTATCCCATCCTCTTGTTCTAGCTTGAAAATGCGTTGTTTTCT  
ATGTTTACCATTAGCAACCAGATGGAAATATTGGGTATTATTATCACCTCCAAAAGGTC  
CTTAGTTTTTGCTCTCTCATACCATTTAATTTCTTCCCTCAACAAATGGACTAATCGT  
TCATTGAGGTAGTGTGTTGAAATTTAATTCTTGGTAGAGAGAGTGGCTATTTCTGCCTTT  
TTATCCAAAGCATCAATCATAGTGATTAATTTATTCTTCTCTTTTTTATAATGGCCAGCTAT

ATTTTTGGCCCAGCCTCTCAAAAATTGTCTAAGGGATCTTATTTTATTTTGCCATCTCTCT  
ATAGCTGCGGCACCATTACTTCCTAATTGCCACATATTAGCAACCAGATCATAGAAACC  
ATCTCTTAGTAACCATCCTCGTTCAAATTTGAACAAAGGACGTTGCCTATTATGAGAAG  
AAGCACCTGTATTCAATAACAAGGGTGTATGATCAGAAGTACTTCTGTCCTTGGCCATT  
ACTGTTGTGAGCGGGAATTTTTGTTCTATTCTGTACTAACC AAAATCCTATCTAGTTTC  
TCAAAGGTCGGATTATACCCGCTACTCGCCCAAGTATATTTGCGACCCGACATTTCTAGT  
TCTCTGAGTTGTAGAGTCTGAATGACCATATTAAATAAATCTGGCCATCTGGCATCAAA  
ATTATCTTTGTTTTTATCCTCAGGACAACGCATAATATTGAAATCTCCACCAATAATATAA  
GGTAGCGATTCTTTACCACAAGTCTGGGCCATCTCAGTTAGAAACCTTTCCTTATATTGA  
TGTTGTGCCGGGCCATAAACTGCAATCAACGACCATTTGAACCCATCACTCTTATTTTCG  
AAGAGTGA ACTTAAACATAGAATTCCCCTTCATCAATAGTACCAATGTCATATACCATCAT  
GTCAATACCGAGGAGAATTCCCCCGGATCATCCATGTGGTGCCATGCAGTGCCAAATAT  
AGTCCTTGCCACCACATAGTTTTTTTTAGGGTCCCATCTGGGAATTGATCCCTACCCGTTT  
CCATGAGAGCAATAAAATCAATTTGCTCCTCTTTTACAATATCTTCCAAATATCCATGTTT  
AGCCAAGTCTCCAAGACCTCTACTATTCCAGAAGATCCCTTTCATTTGAGACTCAACTT  
GGAAGGTGTAATAGGTTTTTTAGGTGTTAATCCCACCTTGTTTTTCTTTCCTGAATTATAT  
TTCTTCCTGCGAGGAATAGCATTAAAGCTCACAGCATATGTGATCATATCCCTCTTCATGC  
ATGTTCTCATCAAAATCCTCACATGCAACATTGAGTTGTGCATCTAGAATATCTTCTTCC  
TCATCCAAATTTATCTTAGGAGAGGAAGATTTATTATTAGTTGTTTTATGGATGTACAAAT  
TATTCTGCAGAACTAACACCATTAACTTAATTAAACCGAATTTTTCCAACCATTGAAT  
TCGCATTCAAATAGAATTAAGAAAGATATGATAGTATGATTTAGCAAAATAAAAGTTAG  
ATTTAATGAGCAGGGAACAACACGGCCACGCATCACAAATAACATGTTTCCACATGAA  
TACGCATGTGAGTGCACACGTGCATGTGTGTGATTTTAGCAATTGTTCTCCTCATGCCA  
CCACATGCTATATGTCACATGTTTTAAAGGGTAGCAAGA ACTCTAGTTTTATATTACACT  
CCTACTTGTACAAGCAATGTGTGACTAAACCATACTATTCTTTAGAATTTTTAGGAATAA  
ATTGGCATAATACTCATGGGTCCAATACTAATATGAGGTCAGCAAGTTCCTGCGCCACT  
CGCCACTGCCTTCACCCTCCCTGACGATAGCAAGGTCATACAGAAGTGTTGGGATACA  
GATAGGCTACACTAGTGCAAATTA AAAATTTCTACTGCGTAAACTAGAAAGCCATACCAG  
TAAGAGATCATATATCATTAGCACTAAATGCATAGTGTAGCAGAAGAAGAGTCAAAATA  
GCCTAGTTCAATGTAGCACATGTCAATATAGTGGAATAGTCGATTGTCCAATGTTTGTG  
AAAAGCGATCTTTGGAAGCCAGTCGATCTCCACATGCCAATTGTCTTTTCGTTGAATCA  
TCGCGATTAGTGTTGCAGTTGCATCAGTGCTTTACCGAAGCCCACACGTTCTAGGGATG  
AAACGTTGTGCGCTGGTGTGCTAGCACTAGCGCACATAATAGGGTCTTTCGAAAGGAG  
ATGGCTGGGGTTTGGTAGGAGGTGCAATGTCTCCCACTATCTCACACATAAACCCATAG  
CCACAATACTCCCCCTTATATAAATCCTTCAGCCGAATCATAATCCAAAATGAGTAGAGAT  
TATATCCTACTTAGAGAACATCCGACCAGATCCTTATCCAATACGAATAGATATTGCATCC  
A ACTTGAAAAGTCTTTGACTAGATCCTTTACTATTCAAATCTATTAAATGTGTGAGCTTA  
TATGTTCATGTATATTTGGTTGTACGCTGAATACATCTTTCCTATCACTAGTCTTTGGTAG  
CGGTCTCTAGTAGGACATATCGACTCTAAATATACATAAAGATCAATCTTGATGAACCTT  
ATGTAATATGATCTGCAACTAAGTCTTGGTCTCTCACAATTAGTTCATAACTCTTTATAAC  
CAAATTGTATCGGTTACGACTAGTCCGTATCCCATAACGACCAGTTCGCAGAATATTTTA  
TGATATGTTTGACTAACTCATGACCAGTCAGTATATCCATACAACCAATTTGTGTCAGAT  
CATACTTAACA ACTTGTTTGTGTACTTTTATTTTGCCTCACGAATTTGATCGAACTTCATA  
TGAGAAACGTATCATTCATGCATTGTTCAATCTTTTTCCGATCTAGTGATAGATAACTTTA



TGTAGTCAACTCTTCGATCACTCATGGTATGACCATGCATTTTCCTTTATCTGACCACATC  
GAGGGGTCTAGAGATATCTCTCGTGTTATGTAGGAGGGGTAAATTCCACACTCGATCAG  
TCATATTCCTCTGCATGTTTTATAGCATACTCAAAAGATATCTTTATAACTACCCAGTTAC  
ATAGTAACGTTTGCTTGAGACCAAATGATAGCATATAAAAAATATATTACCATGTTCTCTA  
ACATTTGTCTATATTATTAATTTGATATCCCTATAACTATGACCGGTGAAAGGTGGTCATC  
AATTAATATATGTGCTAGTCTATAAGTCACTAGTGTTCCGATCAGTGATATCTGACTAGG  
GATCTTTTAGAATAACACCATGATAAAAAGCTTCATTAATAAGTCATATACTTGTTAATAT  
TTATAAATGATAATTCGTTGGAAGAACATAATAATTTACTAAAATAATCATAAATATAG  
AAATAGTATATTCAATTTTATGATCGACTCTAGAACATGTCGCTAACAAAAGGCTGTCAT  
CGCTCACAAAGTCGACTTTCTGCGAGGGAGCTGGGCTCGCATGACTCGAAGGGCTCCT  
CGCCGAGGAGGCTGCGGCGGGGCAGAGGCTCGGTTGAGTTGCGGTTCTGTTGACGCG  
GACAAGCCCAGCTACGGGACGGTACCACGAGCAGCTTATGAGACAACACGCTGTGGG  
ACGGCACGATGGCGTTGCCGCCGATGTGCCCATGTCCGACCGCGACAGGCGGTGCTC  
GGTCGTGACCGATAAGCGCGTCGAGGTGTACCTGCTCGCCATCGCCAACAGCGTCACC  
ATCTGCCGCCGCCTCATGTGACCGACACGGCGACACGAACAGTGGCCACGACTCAAC  
GTTTCGGTGTTTCAGTAAGATTTACGAGTTGAGGGACTGAGGGTGGAGGGTGAGTG  
TAAGAGTGATCGATCACCGTGTGTTGGGATCGACTCTTTTAAAAGTTAAAATAGTTTCAC  
GATCGTCAGCTTATGAGATGGAAAAACCGTGTCAAGAAGAACGTATGGTTGCCAATGC  
AAAATGGGTGCAAGCATGAAAATACTTGGAGGTTGGCTCGTAAGCCCAGCCTGTCAGA  
CCGAGGCGGCGTACACACAGGCCGAGTGAAATGAATTCCTCTCCCAAAAAAAGTGCG  
AGTTGAGTGAATCAAAATGCCTGCAATGGCAGCCGATTTTCGGAGTATCAGGTAACAT  
GCATAGTGCATTAGAGGCTTCTCTTTACATTTTAGTTAGCTTTTAGCTTCTTGCCACAC  
GAAGAACAAGAGTGGGGCTCATCATTTTTTTCTTCTCGGGGGGAAACTACATGAAAC  
TTCCCAAAAGTAGGCACTGAGATGTAGTATCTAGTGCACATCTATGTTTAAAGACATGGT  
ATCATGCCCTGATGTAAGTAGTTATGACCGCAACATAAGTTCCTATTGTAGGCTGGATCC  
TGTTGTAAACCGTACAGCCCAAGACTCGCTCAAACCCAGCTCCCAAGTGGAATGGGCC  
TACGCATGTGCAGAAATCGTTTCGATTTTCTGATCGTTTTGCTTAAAGGCTTAAGCTAT  
TGTTTTGGACGAATAAACATTATATGATCATTTAATTCATTGCAAATTGGTAGTGTGGTG  
GTTCTAAGGGACATGATATTACACCCGTGTTATGAAACACGATGTGAGTGCACATGATG  
ATGTGAAGAACAAAAAGGTGGAGGAATACCGTAGAGTGCCAGATAATAGCAACTAAG  
CAACCACAGCAAAAAGGAAAGAGTTAGCAAAGCAATTAGGTAAGCACTACTTCGAAA  
GGTCATAGGTTCCCGTCCCTACTTTTTTAAAAGAAAAAACTATACTTCCCGTCCATATT  
TTCTTCTAGGGTAGTGATAAATATCACCCGATGTTTTCTTTCTAACTATCATCTAAATTT  
ATGACTATTAGATTAGAGATCTATGACCATAAATTCTTCCCCACCCCTTCCAAAAAAAT  
CTCCCTCTCCTAAAAACAATTCTTCTGATGTCCACAGCAAGTTCAACAGCAGTAACA  
AGACGCTGCTCAAGAGCGAAGCCCTGTACCAGTGTAGGACCGAAATGGCGACAGAGG  
GGGGTGAATGTCGATCGCTTCAAAAATGTCCCCGAGAATTCTTACACAGATTTTTCTAC  
AAGAAGCAAAACAAAGCACCTCACAGAAAATTAATAAAAAAATTTGCTGAAATTTGGA  
ACGCATGCAACACTGAAAAATTCACCATAAATCAGAGATCATCCAGAAAAAATTTCAA  
CTGAAAATATCGATGTTTGATCTGCATGCAAATTGGTCAAAGACAGCGCTAAAAATAAA  
AGAGAGACAACTAAAGCATCTTTTCATTTGGCCATTCGGTTTGGCTGGAGGGAATACTT  
CCAAGAATAATACAAGTGCAGAGCAAAAAGGGCAGCAAGAACTCCTAGCCGAAACAC  
AGAACAGGCTGCTCCAAAAACAGAGAAAATGTTGATTTCTAGAGCCAATCAATGTGGT  
GGCCGAGTGGAGTTAAAAAGCAATTTTAATGCTGCAGTCCGATCTGCAATAAAGGCC

AATATTTGCTGTAGCTGCCGAATGGGATTTGAGGCCCCAAAATGCTATCAGCACTGCAG  
TAAACAATAAACTACTATGCTGTCCAAAACTGAACTAAAAGACTGAATACTGAAACTC  
ACTTTAACCAAAGGGATTGATGCTAAAAACCTATTCTCCTCAGATCACAAGATCAAGAA  
CCTGCTCCACATACTTCTAGGACCTTTCAAAACAAGGGAAGAGAACACAAACACAAA  
AATTTGAGATTATGGCAAAATCTGAAACTTTTTGCAACCCTGAACCAAAACCCAAATTA  
CTCCATGGTCTTAAGTCCATTGCACATGAGATTTTGCAGGTATGTTAGCAATAGCATAAG  
GACTACTCAGACCAAAAATCGAGTCAATCCCTCAAGAGAATCAAGATTAGCAGCAAAC  
CCTAGAACTGCAAAACATGAACAGGGACCTTTCAAAAATCCAAATTTCCAACCTCTTT  
ACTGATCTTTTGGCTATGAGATTTTAGAGCTAGATACTAGATAGCCTCAGAGCTCTTCAT  
ACCAAATCTCATGCCACCTCTCCAAAGGAATCAAGAGTTCCACCAAAACCCTAGAACT  
CAAATGCAAGAACAGAGGAACTCAAATGAGGAAATTCGTGATTTCATCTTGGTTTGCTC  
TTTGGATCAACTAGCCAAATGGCTTTTGAGCATCTCCCATGTCATAGCAACCCATTTTG  
GGCCTTTCCAACAAGAAACAACAGGAAACACAAAATCTCACAAATCAAGTCAAAAAGA  
GATATCGAAGAACAGAGGGCACCAGAGAATAAACACTTCAGATTTCCATTTCATTGGAT  
CAAATGGAATACAAATACGTCCCGATACGCCTGGACATTAGGACATAAGAAGTGATTAC  
ATGATCCTCAACTCATCCTCACCTCTCCACACAAGAACACACCCATACATGATTGGA  
GAAGAGGAACACCACTCTGTTCTATCACCACTCAAGAACACATCGTAGGGGACAACA  
GAGGGAGCACAGCCCTGCTGTATACCAACCCCTCCACCAACTAAAGCCCTAAAGCCA  
AAACAACCACTAAAGCCTATTTTGACTAAAGGAAACCCCTAAACTCTTGGAGTGCTCA  
AGTGACATGCAGCCCCCTCCACTCCTTTTATAGCCCATGGCTAACGGGTCTCCGCCCCG  
TTACGCCCCGCTATTTCCAACGGAGCCCGCTCCCGCTTGTGCAGCCTTGCGAAATTCGCG  
TTTCGCCCCCTCCTGCACCTTCCGGGAAGCTTCCGCGCTCCTTGTCTCGCACGCCTCGCA  
ACCACCTCGAGTCCACGTCTGCTTCGACACCTCCTGACTGTTCTGACCTCAGCGCCAC  
CTGCGCCTAGTCCAGTCTCCTCGTGTCTCGCCACGACTCCGTCTCGACGTCTGACGTC  
ACACAGACAAGAAACACGTACATAGCACCGCTCGATACATGAAAGCATAAGTAACAT  
CATACTTACCATGACGAAGTCCAAACCTGTGCAATCATCGGAATAAACAGCCTAATCCC  
ATACAACCAAGTTTGACCAAAGTCCGACCGAGTCCAATTGCGCCACGCAATGACTCGA  
CTCCGAACCACTCAAACCAAACCTCGACTATCCTAAACCTTTGTCAATTACTCATCATT  
ACATGGAGTCACGACCACCTGGTCTCTCAACCAGTTAACACACAAAGTAACACGACA  
GTGACACACCTAGCTATGTCAAGAACATTTCGACGAGTCAGTGATCATTCGTTCTCTCT  
TTTTCTGCTGACGAAGATATGGCCGGCCATTTGCCGTCGACGTGCAGTATATTCTGGAC  
ACGATGGTGCTGCCGCGCGAGACGGAGTGCATGCGCGAGCTGCGCCTCCTGACGGAC  
AAGCACGAGCGGTACGTACGTACTGCGCGCGCTATACATCTCACTCTAGTTTTTAGTAG  
CAGTCGCTTTTCACTTGCATTGCCAATTTGCCAGACATGCATGATGGATGATGCGTGT  
TTTTTTTTTGCTTAATTAATTTGCTGTTGTTTGGTCTGTGTGATGAAATATATATTGGCAT  
GTGTAGGTGTTCCATGGTGTGTCGTCGCGGACGAGGCCAGCTGCTAGGGATGCTGATC  
AAGATGACCGGCGCCAAGAACACCATCGAGGTGCGAGTGCTCACAGGTCCTCTCTC  
CTCGCCACCGCGCTCGCGCTCCCCGACGACGGCATGGTGGTGGCGATCGACGTCAGCC  
GGGAGTACTTCGACCTCGGTCTGCCCCTCATCCAGAAGGCCGCGGTGGCGCACAAGG  
TGGACTTTTCGCGAGGGGCGCCGGGCTCGCGAGACTCGACGAGCTCCTCACCGAGGAGG  
GGAACGAGGCGCGCTTCGACTTCGCGTTTCGTGGACGCGGACAAGCCCAACACGTGC  
GGTACCACGAGCAACTGTTGAGGCTGGTGC GCGTGGGCGGCACCATCGTGTACGACA  
ACACGCTGTGAGGCGGCATGGTGGTGCTGCCGCCGACGCGCCCATGTCAGACCTGG  
ACCGGCAGCGCTCAGCCGAAATCCGGGATCTCAATGCAAAGCTATCGCCAGTTTTGTT

TCGGCTGATTTTT**TAG**

>DfCCoAOMT9 (DfaB07G011900)

TTATGCCATACAATGAGAAATTTTCATTGGATTTTAATTGTAATTATAACCAAATAGAACA  
AGGCTATATAACTTGATTCTCTAAGTAAGAACAAATCCAAGTACACAGCTATCGCCCAA  
ATACTCGATAGGTACGTACATTGTACATTGTACTCTTTCTTTCCCTTCCGAATAACTAATCT  
AACTTTTTTCGAATAACGAAGGTCGTTTCGCCACATACGTTCAACAAACACGTGACTCGA  
CGACAGGGGCCAAGGCCTTGAAACATGATCGCAAGTTTCGGGTATTTCGCTAGCTACAC  
ATTAATTAATCATATACAACACATAGTAGTAATGCCACTTGATTTAACACATTATATTTTTT  
GCAGTGCCACCAGCAGGAGCCGGGCAACACGTGTGGATACTACGTGTGCCACCATATG  
AGACTACTCCTCGATTCCACCAAGATCACTAATTCTAAGGTTTGCAATCTTCCACATT  
TATTTCATACATGTCAAGTTTTATATATGCGCGCGTTGATATTCCTATCGACAGACTGCGT  
CCATCTCTACATCTGCATTGACACAGCCGAATTTTGCAAAAATTCGAGGAGAGCTCATT  
TGGTTTTTGTGGACAAAAGTCGTAAGATCAGATGGAGAGTTCCACTGCCCAGAATGAT  
TTTTTATTGTAATTCTAAGTGCAAATACAATGTAGATCTTTTACAATTGTGTATTTGTAA  
TGGATATTTTATTTCAATTCAATGAATTGATTTGCGAAATGGATGCTTTATGTTTGTGAAA  
TGAAGTGCGTTGTCAATTGGATGTTTTATGTCTGTGAAATGAATTGAGATGTGAAATGT  
ATCTGAAATGAAATGAGATGTGTGAATTGTATATGTTTTATGTCTGTGATTATCTGCTTGT  
TTCAGAGGGCATGGCTAGCATTTCCTGAGGCTAGCCAATAAACAGAAATATATTTAGGG  
GTTGAAGGGAATATCACAGACGGTTTTGAGTTAAAAACCGTCTGTGATAGCTGATAATC  
ACAGACGGTTTTTAACTCCAAACCGTCTGTGATTATCAGCTATCACAGACGATTTTTAA  
CTCAAACCGTCTGTGATTATCAGCTATCACAGACGGTTTTTAACTCAAACCGTCTGT  
GATTATCAGATATCACAGACGGTTCAAAACCGTCTGTGATGACCGTCGATTATTACTG  
ACCCATAAATACAGACGGTTCACAAAACCGTCTGTGATGACGATTTTCGAACCGTCTGT  
GATGACCTTTTTCTGTAGTAGTGTACCCTCTTGACAACTCTGCATTCGTACGGCATGATG  
CTCTTGCTGATTAATTTTCTCAGCACGCGGGGTATGCTTCCTTTAAATTACAGGTTTTTC  
CTCCGAGCGCGCAGTGAACATAACAAATAAGGGTTTTATTAAACGTCATCTAGATGTTTT  
CCCGTCATCCATCGCGATATCACACCCAAATCGCGGTGAATGGAGCATTGGAAGATTTCG  
AATCTGCGCTGTCGTTGAAGCAGCAGCTTCTTGGAAGGACCGGGACAGAAAGCTAAG  
AGGTTACTTTGCCATTTTTTTTCTAGTCAATCCACGATAAATTGAGTGCGTAGGTTGCAG  
CGGTTGGTGGCGGTAGGAACGTGATCGCGCATGGACCGGCACGACGGGAGGACGAGC  
ACGCAAAGATTAACAAAAACGCTTGACAGTACTGCACATGCATTGATCAAACGCCACC  
GTTTGGTCTGGCGATTGGTCGGCCAACAACCAAATTATGCAAGTGGTTGATTTCTTTTC  
AAAAAGGAAAAGAAAAACATCACCTACACACATAGTGTTGATTTCTTTTCAAAAAGG  
AAAAGAAAGACATCACCTAACACGGTGATGATTTATTAGAGAGAGAGAGAGGGGGGGG  
GGGGGGGGGGGGCTAGTGGGAAGAGCGAGTGATCTGGCGACACCAACTCCTCCGTT  
AGTTGATATTGATAATATAAATAACACGCCTAGCTAAGTAGTGGGTGGACACGCCAACC  
CGCACCACCAGCTGAAGCAGAGGAAGAGCTCAGGGAGGCACCTAGCCAGCCAGGCA  
GCCAGAGAGATCGGACC**ATG**GCGACCGGCGGCGACAGCGTGCCCAACGTCCACAGCG  
ACATCGACAGCAGCAACAAGACGCTGCTCAAGAGCGACGCCCTGTACAAGGTAAACA  
CACTAGCTAACACGCAGATCGAACGTAAGATCGACGAGCCATTAGTGAACGTTCTGTT  
TTTCTTTGCTGATGGTGGTATGGTCGTTGCCGCTGACGTGCAGTATGTCCTGGACACGA  
CGGTGCTGCCGCGCGAGCCGGAGTGATGCGCGACCTGCGCCTCCTCACGGACAAGC  
ACAAGTGGTACGTGGTTTAATTACCTGCTAGCCTCTCGTCTCGCATGTTCTTTTGTGGTT

AGTTCGATGTTGTTTCGGTCAGTTGGGATTCGGTGTGATGAAATCGTGTCTGGTAATTT  
CAGGGGGTTTCATGCAGTCGTCGCCGACGAGGCGCAGCTGCTGGGGATGCTGATCAA  
GATGGCCGGCGCCAAGAACACCATCGAGGTGGGCGTGTTCACGGGCTACTCGCTCCTG  
GCCACCGCGCTCGCGCTCCCCGACGACGGCAAGGTCGTGGCGATCGACTACGACGGC  
GAGAGCTACGAGGTGGGGCGGCCGTTTCGTCAAGAAGGCCGGCGTGGCGCACAAAGGT  
GGA CTTCGCGAGGGCTCCGGTCTCGATCGGCTGGACGAGCTCCTCGCCGAGGAGGC  
CGCGGGCGGGCACGAGGCGCGGTTTCGACTTCGCGTTTCGTGGACGCCGACAAGCCCAA  
CTACGTCCGGTACCACGAGCAGCTGCTGCGGCTGGTGCGCGTGGGCGGCACCATCGTG  
TACGACAACACGTTATGGGGAGGCACGGTGGCGCTGCCACCCGACGCGCCCATGTGCG  
GACCTGGACCGACGGTTCTCGGTGCGCATCCGGGACCTCAACGCGAAGCTCGCTGCC  
GACCCGCGGATCGAGGTGTGCCAGCTCGCGATCGCCGACGGCGTCACCATCTGCCGCC  
GCCTCGTG**TGA**CAGATACAGCGGTCTGGGTGCTGTGGTCTAGTTCTTGCTGCTTTAATTT  
CGTTGAGCGTTTGGTGATTTCAATAAAATTTTCGCGAGTTGGGAC

>DfCCoAOMT10 (DfaB07G011910)

CGCCGATATTCACCAACCCTTCCTATTTTGGATGGCACGAAGATCGAGATTTGATGGAA  
AAAGCCTTGCGTCCATTGGTGTTCCTTGATGAGGCGTGCGAGAAGACGCCTAGTTGAT  
GACTCGGCAGAGTACGACTCGCACGGCGAGGAGCGTTTCTCTTGAGATCGAAGCCAA  
CTCGGGAAAACTAAATCGAATCAGAGCCTGCCGGTTTGGGCTAAAAAATATAACTTG  
TAATTAATAATTATACTATAATTGATAATATTTTATTTGATATAATTAAATTTAAAAAATTAA  
AAACAAGTTTGCCTATTAGAGACATGCAATGAATATAAAAAAAGAAGTAAAAAAGC  
TAGGAAGCCACAAAAAGACAAAATTTAGAAATAGTAAAAAATAAAGAAAAAGTCGGA  
AGCTGAAACCGAAATGAGCGAGGCATCAATCTCCCTTGTGGAGAACGAAGCCGACTT  
GTCTTCTCTAGCTTTAATATCAATGTTGGATTTTCTCTAACCTTAAATAAATTTTGTGAAG  
GCTTTCGGTCTACTCTCTATTCTCTGTCTTATCCGTGATGCCGTTACAAATACATAAC  
AAGGCTAGAGGGTAGAGACCTATTTATAGACTCCACTTTCAGGTGTTATAAAGTGACCC  
ACCTGTTTTTCGGTATCCCATGAGACTCTTGAACCATGTCACCAACCACGATTAGACAAG  
CCAGTTTTATAAGTCAAAAAATATATTAGTCTCAAGCATAACATGTGTGAGTCATGCGCCAT  
AGATAGACTAGTTTTATGAGTCTAAAAATATATTAGTCTCAATCACACATGTGTGAGTCAT  
GCGCCATAGATAGACTAGTTTTATGAGTCTAAAAATATATTAGTCTCAATCACACATGTGT  
GAGTCATGCGCCATGTCAGGTTGTTTATGAGATCAATTCCAATAGGATCATATGGGTCAA  
CAGCTGCAGAGCCGATCCTGCAAAACAAATCCAGCTATTCTGCCCTGTGCTGTGCCCCG  
GGTTAAACAAATGCATGCATATCAAATTCAGTAAACCTGATCTCAATAAATATGTCTAC  
TATATTCCAGCACAGCCGTCTTCGGCACCTCGAGTATTAATTTCTCGAGTTAAATCCAC  
ATCAAATATTCCCTATCACTTGCATCAATAATATGGATAATTCCACTTTGAGTAAAATAGA  
CAATAACCATAATAAATATTGAAAGCCACATAAAATTTCCAATAGGGCGAACCCGTAGC  
GGGGGGGGGGTGGATTTTCCTCCTCAGACGCCAGATCCGGCGACGGCACCCCTCTAGG  
CCACCGGATCCAGCGCGCAGCAGAGCGGACTGTAGAGGAGAGCTAAGGGATGGCGGC  
GGCGAGGGAGGGAGAACTAGAGCTAGCGGGGGAAAAAAGAGCGAGAAGGGAAGAA  
AGGAGCGGCTACGGGAGCGGAGCTATGGATGAGCGGAAGTAATCAGTGCATTGAGATC  
CGTGCGTTAGATCCAACGGTTGTGGAGCATTCCATCAAACGGTATAGGGTGCTCTAGT  
TTTTCTCTTGTAACCTATTATAGATAGTTTGAAAAACGTCTACAATAATCGTATGTTATTA  
CAGATATATAAATTCATACGATTCCAAACTGTCATAACGGTTTTGAACCGTATGTGATGA  
CCAGTTTCGATAGTAGTGATGCTAGTCTGCCATAAAAAACATGTATGCTAGTGTGCTAG

CTCCTTACATTAATATTTATGTCGCCAGCCACGCGTTGGTTGGTTTTATTCAAGACGAAG  
GGATCGATAGTTCAGTTGGGCACAAGGCACACGCAATTAAGACGATAATTATAATAAGG  
GATCGATAGTTCAGTTGGGCACAAGGCACACGCAATTAACATCCTGTATTTTATGTAGT  
ACTATCCCTGTAGGAATGAAGCGTCTTTAGTTTGTATTGGAGAGGGAGGGGGCGAGAG  
AGAGAGAGAGAGAGAGAGAGAGAGAGAGAGAGAGAGAGAGAGATCATCGGAGCC**A**  
**TG**TCGACGTACCGGCCGGACAGCAAGACCCTCCTCAAGACCGACTCGATCTGGGAGG  
TACGTGACGACCACAGTTTAGCTCCCTTTCTTGCTCAGTTTGCCGAGTGCGGCATCACG  
CGCTGCTGAGATTAGCATGCACGCATATATGCTTGACGTACGTGCTGGACACGACGGTG  
TATCCGCGGGAGCACGAGCGCATGCGCGAGCTCCGGCTCATCACGAAGGAGCATCCGC  
GGTACGTGCCTTGCTACGTGAAGAGTATATATATACCAATCACGTACGGCCGGCGAGAT  
TGTGTATATCAATTACTCATGTTGCGCGCAGCTGTTTACGTCAATTGTTGCTGGCCAGGT  
CGTTCTTTGCGTCGTCGCCGGACCAGATGCAGTTCTTCTCCGTCCTGCTCAAGATGATC  
GGCGCCAAGAACACCATCGAGGTGCGCGTGTTCACCGGCTACTCGCTGCTCGCCACCG  
CCCTCGTCCTCCCCGCCGACGGCAAGGTCAGTTAGCTCACAAGACGGAATTAGTGGAC  
CTTGACTACTTCATCCAGCCATGCATGCATGTTTAGTGTATAGGCCGCGCGTGCATGATA  
TCTGCACAAGTTTGCATATGGCAGGTGGTGGCAATCGATGTGAACCGGGAGTACTACG  
AGCTGGGCCGGCCGGTGATCGAGAAGGCCGGAGTCGCGCACAAGGTCGACTTCCGCG  
AGGGTGACGGGCTTACGGTGCTGGACCAGATGCTGGCCGAGGACGGCGCCGGCGCCG  
TGGCCGGCACGTTGACTTCGCGTACGCGGACGCTATCAAGATGCACTACGACGGCTA  
CCACGAGCGGCTGCTGCGCCTGGTGC GCGTCGGCGGGGTGATCGCCTACGACAACAC  
GCTATGGGGAGGCTCCGTGGCGATGCCGCGGACACGCCGAGCAGCTCGGAGCACGA  
CCGCGTGGTGCGGGGTACATGATCGAGTTCAACGCCATGGTCGCGGCCGACGACCGC  
GTCGAGGCCTGCCTGCTCCCCTTCGCCGATGGCGTCACTCTGTGCCGCCGCTCAAGT**T**  
**GA**

>DfCCoAOMT11 (DfaB07G011930)

CGTTTTTTTATAGATCCAAGCCAACCCGAAAAACAAAATCGTGCGAGAGAAACGAGGA  
GCGTTTTTTTATTTTGAAGCCAACCTCGGAAAAACAAAATCAGGGCCTGTTTTAAGTCA  
AAAATGGCAGCTTTTAACTTTTACTATAGTACCTAATTTTCAAACGTAGTATTTTTTTA  
AAATGGGGTCTACAAGTTAAACAATTTACACGTTAAAAGTCCAACATCTGTACCAGCC  
AAAATCGCAAATGAGTATCTATCTCTCCGTAATTTGTACCATAAACAGCCAAAATTTTAA  
AAATTTAGCCAAAAGTCATAAGTCGCAGCCGAAAAAAACAAGCCCTCAGAGCCTGC  
CCGTTTGGGCTAAAAAATATAATTTATAGCTAAAAATACACTATAATTGATAGTGACTTAT  
TTAAATAATTAATTTAAAAAATTTGAAAATAGAAAAAAACAAGTTAGCCTATTACAG  
ATAATGCAAACGAATACGAAAAAAGAACTGGCAAAAAGCCAGAAAACAGAAAAA  
GACGAAATTTAGAAAAAGAGAAAAATAAACAGAAAGTCAGAAACTGAAACTGAAATG  
AGCAGGGCCTCAATCTCCCCTGTGGAGAACAACGCCGACTTGTCTTCTCTAGCTCTGA  
TATCAATGTTGGATTTTCTCTAACCTTAAATTAATTCTGTGAAGGCTTTCGGTATACTCTC  
TATTCCTCTGCTTTATCTGTGGTGTGCTCACAATGCATAATGAGGTTAGAGGGTAGA  
GATCTATTTAGAGACTCCACTTTCAGGTATTATAAAAGTGACATATTTGTTTTCGGTATCC  
TATGAAACTCCTGAACCATATCATCAACCACGATTAGACAGGCAATTTTTATGAGTCTAA  
AATATATTAGTCTCAAGCACACATGTATGAGTCATGCGCCATGATCAGGTTGTTTATGAG  
ATCAATTCCAATCTGATAATGTGGGTCAACAGCCTGTAGATCAGCCGATCCTGCAAAAC  
AAACCCAATATTCCGCCCTGTGCTGCGCCTGGGTAAACAAAATGTATGCATATCAAT

TCTAGTAGACCTGATTTCAATAAATATGTCTACCATATTCCAGCACAGCCGTCCTCGGCA  
CCTCGAGTATTAATTCTTCGAATTAAATTCCACATCAAATATTCTCTATCACTTGTATCAA  
TAATATGAATAATTTTACACTGAGTAAAGTAGACAATAACTATAATAAATATTGAAAGCC  
ACATAAAATTTCCAATAGGGTGAACCCGTAGCGGGGAGGTGGATTTTCTCCTCCGA  
CACCAGATCCGGCGACGGCACCCCTTTAGGCCACCGGATCCAGCGTGCGGCAGAGCC  
GACTATGGAAGAGAGCTAAGGGATGGCGGCGGCAAGGAAGGGAGAACGAGAGCTAG  
TGAGGGAGAAAGGAGAGCCAGAGGGGAAGAAAGGAGCGGCTACGGGAGCGGAGCT  
GCGGAGGAGCAAAAGTAATCAGTGCTTTGAGATTTCGTCCATTGGATCCAATGGTTGTG  
GAGCATTCCATCGAAACAGTATAGGGTGCTCTAGTTTTGCTCTTGTAACCTATCATAGAT  
GGTTTGAAAATCATCTATGATAACCGCATGTCATCACATGTACATAAATTTATACGATTCG  
AAAACCGTCATGACGATTTTGTACCATCTGTGATGACTATTTTCGGTAGTAGCGCACGCT  
AGTCTGCCTCAAATAAATATATACGCCAGTGTGCTAGGTCCTTACATTAATATTTATGTCG  
CCAGCCACGCATTGGTTGGTTTTATTCAAGACGTAGGGATCGATAGTTCAGTTGGGCAC  
AAGGCACATGCAATTAAGACGATAAATAAGGGATCGATAGTTCAGGGCACAAGGCACA  
CGCAGTTAACATCCTGTAATGTATATGGTACTATCCCTGTAGGAATGAAGCGTCTTTAAT  
TTGTATTGGAGAGAGAGGGGGCGAGAGAGAGAGAGAGAGACAGAGATCATCGGAGA  
C**ATG**TCGACGTACCGGCCGGACAGCAAGACCCTCCTCAAGACCGACTCGATCTGGGA  
GGTACGTGACGACCACAGTTTAGCTCCCTTTCTTGCTCAGTTTGCCGAGTGCGGCATCA  
CGCGCTGTTGAGGTTAACATGCACGCATATATGCTTGCAGTACGTGCTGGACACGACGG  
TGTACCCGCGGGAGCACGAGCGCATGCGCGAGCTCCGGCTCATCACGAAGGAGCATC  
CGCGGTACGTGCCCTTGCTACGTGAAAAGTATATATATACCAATCACGTACGGCCGGCGA  
GATTGTGTATATCAGTTACTCATGTTGCGCGCGGTTTACGTCAATTGTTGCTGGCCAGGT  
CGATCTGGGCGTCTTCGCCGGACCAGATGCAGTTCTTCTCCGTCCTGCTCAAGATGATC  
GGCGCCAAGAACACCATCGAGGTCGGCGTGTTACCCGGCTACTCGCTGCTCGCCACCG  
CCCTCGCCCTCCCCGCCGACGGCAAGGTCAGTTAGCTCAAAGACGGAATTAGTGGACC  
TTGACTTACTTCATCCAGCCATGCATGCATGTTTAGTGTATAGGCCGCGCGTGATGATA  
TCTGCACAAGTTTGCATATGGCAGGTGGTGGAATCGATGTGAACCGGGAGTACTACG  
AGCTGGGCCGCGCGGTGATCGAGAAGGCCGGAGTCGCGCACAAGGTCGACTTCCGCG  
AGGGCGACGGGCTCACGGTGCTGGACCGGATGCTGGCCGAGGACGGCGCCGGCGCCG  
TGGCCGGCACGTTTCGACTTCGCGTACGCGGACGCTATCAAGATGCACTACGGCGGCTA  
CCACGAGCGGCTGCTGCGCCTGGTGCGCGTCGGCGGGGTGATCGCTACGACAACAC  
GCTATGGGGCGGCTCCGTGGCGATGCCGCGCGACACGCCGAGCAGCTCGGAGAACGA  
CCGCGTGCGCGGGGTTACATCATCGAGTTCAACGCCATGGTTCGCGGCCGACGACCGC  
GTCGAGGCCTGCTTGCTCCCCTTCGCCGATGGCGTCACTCTGTGCCGCCGCTCAAG**T**  
**GA**

>DfCCoAOMT12 (DfaB07G012160)

AGCATATGGTATTACAAGTGTAATATATTCTAGTTATCACAACCTCAACATGAGAGATCTA  
CTGTAGCTCTGCTCCATTGACGGTACAAGAGTTACTTTCTTCTAAATTTTTCTATAGGA  
GCAGTTTTCAACATGTCATGAAATTTAGTTACTGTGACAGTTTGATGTACATGATTAC  
ATGTGCAAGTTACTCTATGATAGACATTGTTTGCTGAGTTATATGTTCTAGTGAGCATG  
TAAAAAGTTCATAAGATAAGTTCTTTACTATAGTTATCTAGCGTCACAAGAGAAGTAAA  
GACCGATCCAGTCTTACTCATCGATTAGTCCTATGGACTTTTAACACATAAGTATCATTT  
ATGGTGGATTATGATTTAAGGATATTTAATTTGTTTTGGCTACATGAGGGAATTTGGCTTA

ATATGGAGATTGTTGACTTTTTTTTATCCTAATTCTATTTGGCCTAATTTTCGTTTTCAACA  
CCAAGTTTTACTTTTACCTAAAGTTCCTACATAATTACTATAAATATATTCCTGTAGACCA  
TAAAAAAAGTAAGAATCTCATTGTAAATATCTCTTTATATAGTAATTTTCGTCTTCATGTG  
TTTGTAGTTTTTTTGGTATCTTCTATTTTTTCTTTTAAACATCTATTTTTATAGTGCATCTTA  
GGACAGTTTGAATGTATGAACTTCCTCGCTAAGTACACGAAATCAACAGAGTCCAAC  
GAATGATGTACTCGAAACGGAAAGATATCCCTAGATATATAATATAATAGCGTTGTTATTG  
AGCCCAAAACAAAACATCATCGATGACATATTGCCGACAACACTACATGAAACGGAAAGA  
GATGCCTAGATATATAATATAATAGCGTTGTTGTTGGGTCCAAAACAATACATCATCGAT  
GACATGTTGCCGACAACACTACATTTCTGGCCTATTCCATACTGCGGTCTGCCTGATTCT  
CAATAGCCCAAAGCATGAGCATGTAATACGCCACAATTTGGTCCCCATCATATTCATACA  
TCCATGGTGCTGTGTTACGATTTACGGGGAGGATAACACTTTGAGAGATTCGATTTTGC  
TCTGTACTACTTGGATGAAGTTTCCGAATAATAAACAAGATGAAGACAGGGAAAGAAA  
ATAACACCTTACGCTTTGATCAAAGGCTACCTTCAGGTAAAGAAAGTTATTTATTTTTAA  
AAGAACTAGCCAAATTTCCACCACAATTGCACACGATGCATATATTTCTATCTACACATA  
GAGTTGTAATTGCACACGATGCATATATTTCTATCTAAACATAGAATTGTACTTATTATAC  
AACTTTATTGCTTACGATGGGAATACAACAGTGTTTCATTATACAATTTTAGTAGGTCTTAT  
ATCTGTATATGTTTAATCTGCACCGTTATAATCTGGAGCCACCTCAATCGACGATGTCGA  
CCTTTCTTTTTTCTCCTTCAATTATTAACGTGATAATTTTTAGTTCTTGAGAACGGACGT  
GGTAGCTTCTTTTTGTATGTTATAGTCTAAAGAGTGTTTTTTATGATAGAAAGACTTATG  
GAAAGGGGCCACCTCAATCAACGGGTGTAGATCTTCTTTTCTTCGATTATTAACATAGTCAT  
TTCTAGCCTCTAATAACTTGGTAGCATTTTTTTCTGCCGTTATAGTCTAAAGAACATTTTC  
TTACTTATAGAAAGACTAATGGAAAGAGGGACCTAGAACCACCACCAAGAACATTTCT  
TCCCTTACGCGTAAGCGTAAAACTGAAGATTGTGAGGCGTTTCCTCTTGATCTGGTATT  
CCGCAAAGGAGGTGGATAGGGTCAGCGAATGAAGTGGCGAGGGTAGAAAAAAAAGG  
TTTGAAATTCCAGGTTCCCGCGGTATTAAGCAAAGGACAACAAGTCTAAGTCTTTTGC  
AGTAGATAAATATCACGCCGAGCTAGTGCGGCGGACACTGAGTGCAGCTAAAGCAGAG  
CAAGAGCTCAGGGAGGCAGCGAGCGAGCCATGCGGACACACAGCGACAGCGTGCCC  
AATGTCCATAGCAACATCGACAGCAGCAACAAGACGCTGCTCAAGAGCGAAGCCCTG  
TACCAGGTAACACACGGCACATCTATGTCAAGAGCGTTAATTTGACGAGCTGGTGAGT  
GTTTGTTTCATTTTTTTTTCTGATGGTATATATGGACATGGTTGTTGCCTTTGACGTACGTG  
CAGTATATCCTGGACACGACAGTGCTACCGCGCGAGCCGGAGTGCATGCGCGAGCTGC  
GCCTCCTCACCGTCAAGCACGAGAGGTACGTACTGCGCGCACTATTTATCTCTCTCTCT  
CTCTCTCTCACATACACGCACACTCACTCACTCTTTTTAGTAGTAGTGGCTTCTTCTTTT  
ATGGTCAATTTGATGTAGTTTGGTTGATCTGATGAAATATATATTGGCATGGTGCATAGAT  
GTAACATGGCGTCGTCCCCGGACGAGGCCAGCTGCTAGGGATGCTGATCAAGATGAC  
CGGCGCCAAGAACAATATCGAGGTGCGCGTGTTCACTGGCCACTCGCTCCTCGCCACC  
GCCCTCGCCCTCCCCGACGACGGCAAGGTGCTCGCGATCGACGTCAGCCGGGAGTACT  
TCGACCTCGGCCTGCCATCATCCGCAAGGCCGGCATGGCGCACAAAGTGGAATTCCG  
CGAGGGCCCTGGGCTCGCGCGGCTCGACGAGCTCCTCGCCCGGGAGGCCTCGGCGGG  
GCACGAGGCGCGGTTTGAATTCGCGTTTCGTGGACGCGGACAAGAACAACACTACGTGCG  
GTACCACGAGCAGCTGCTCCGTTGGTCCGCGTGGGCGGCACCATCGTGTACGACAAC  
AACTGTGGGGTGGCACGGTGGCGCTGCCGCCAATGTGCCCTTGTCGGACCTGGACC  
GGAGTCGCTCGGCCGAAATCCGGGACTTCAACGCGAAGGTGCGCGCTGATAAGCGCG  
TCGAGGTGTGCCAGCTCGCCATCGCCGACGGCGTCACCATCTGCCGCCGCTCGAGT

A

>DfCCoAOMT13 (DfaC07G006610)

CTGCTGCATAGAAAGGGCCCCACAGCTTGATGGCATCCTACAGCGATGCCTTATCAACAA  
ACATCAAATGCAACCGAACCTCTGTCCCATGATACTCCACAGTAATTCATGCTCGTCA  
TATGCATAAACACTCTCAGCATCGAACCGGTTCCATTCCCTGCGGGACAGGAGCTTCATC  
CTCATCCGAACATATCCTCGTCGTCCTCCTGTACAGCTTCATCTTCAGCCCATGCCGTCTG  
GTCATTGCACTCCATCTAGTGCACATGTACTCTATATGCTCCCCCTTCATCGGCTTGTCTT  
GTTCCCTCACCATGGTGTGACCATTCTCCCTCTCCTCCATGTACCGTATTAGCCTCGTCA  
CAAGTATCTTCCTTCTCTTTGCCAATATGCAAGCAACCCGAGCTGCTCGCACCTCCCAG  
ATGATGGCCGTATGCACGACCTTGACAGCTTCTAATGGGCATGGTTGTACAAGCATGA  
CACACTCATATTCACGGCGCCGACACCCTTGACAAAACCCCTTCCATGTAACAGTGTGC  
ATCAATGTTCTCAACTCCTATCTGATGTCCGTGGGAGACCGGCTCTAAAGCATTTGTATG  
ACAATGCTGTACACCTCGGGGTTCAAACGAAAACTGTGGGTAATCCAATGCATCACA  
TCTGAGATTCGAGCATTCTCGCCGTCCGGGTGTACCAGAGTGGCTCGCGCAAACTGC  
TCAAATCCATACCATTTCGGACCTTCACGAATGGTTCTAGCACCGTAATGCACTCTCAAT  
GTAGTGGGTATCGGCATTGCTGATGTCTGCTTGCATATATGTTTTAATTTTGCAACATATC  
AAATCGCATCGCACACTACGAAAGTACTGATGTACTGTAATTCACATTTGACCGATCGT  
TCGGCTGTCGTAACCAACTACACTAACCTCGTAGTATAACCTCCTACGGTAGCCACAC  
ACCGATGCCGCACTTTTCTCTCTACTCGAAGTGTACCCTACTGCAAATAATTCCTACTGG  
TTTCGACAATTTATATGACATATCGATTAAATGCCTATGTACCAGTTACAATGGTACATA  
TGTTTTTCCAACATACTAACGATATTACATTCATTCATATTTAATCACAAATATTACGTATA  
ATTGTTTTTACAAAGTAAATTATGAAATTCTTACAAAATATTGACTGAATTTTGTAATAC  
CTATAAATTTGTATGGACAATTAATTTGTACGTAACGTTTGCTGAATTTTCTACAACCTAC  
AATTTTATATGCATGCCAATTGCTAACGATGCTAATTTTGTACATTTATGTTCACTAAAT  
TATACACAACTACATGCTACTATGACTGCTAAATTTCTAAAATTACATTGACTAAATTTT  
TATACCAAAGTTCAACTATTTTTGTCTACATCTAAACTTTTCTACTCATACTAACCCATAA  
TAAAATATCTACTGCATATACAAAATTTCAAATACAAAAAATTACCTCACAAAGTGGCTT  
CTTCCTCTCCTCCTTCATCTCCTCTCCTCTTCTCCTCCCTCTCCTTTTCTCTCCTCTCTT  
TCTTTCCTCTCTTTCTCCTCTCCTCCGCCGTCTCCTTTTCTGTGCGCTGTGCGTTCTGTT  
AGCGCTGCGTGGCCCTTTTATCTGCGCTTCATTCGCCCAACCTTCGGCGACTGGAAC  
GCAGTCGTCTAACGTTGGGTGACAGCAATTGCAGTCGCCTGACCGTTGGGCGACTGCA  
ACAATTCGCCCAACAACAGTGGATTGCTTGCGTTTCGCTTGACCGTAGGGCGATAGG  
CTCTAGTCGGCCGACGGTTAGGCGAATGGAGTCTATTTTTGTAAAAAAAATTTGATGG  
AATATATTTTATTATTTTGAATAAAAAATAGAGTATTTGTAAAAAAAATCTCAGTTTGT  
TACACTTGGCGACGCAAGGCTGACACTCTCGCTTGTTATATAGAATAATGCCACTCCTG  
CGCCATTGCTCACCGGACTTGACGCGCATGCTGCGAACAGCGACGCGGCCGGCG  
AGGTCAAGGACATCCACACCAACGGCAGCACCAAGACCCTCCTCAAGAATGACGCCC  
TCTACGAGGCAAGTACAATTGTCTTCCCTGAATCTTTCTTCTCGTTCCAGCCAGTTC  
GGCGCGTGGATCGAGATCTGCAAATGCCTGACGCGTACGCGCGCGCGCGCGCGCG  
GTTTTCTGCTTCTCTATTGCAGTACATGTTGAACACGATGGTGTACCCGCGGGAGC  
ACGAGTGCCTGCGCGAGCTCCGGCTCATCACCAGGAACACACCTAGTACGGACGCA  
CGCCTAATTCGTTTCTTTTTTTTCTTTTGATCTCGCGTGATTAGTTAATATGGCCATGC  
ATCACGGTGGATTTGGTTTTCTTTTATTAGTGGGTTCATGTCGTCGCCGCCGGACGAGG



CGCTGTTGCTGTCGCTGCTGGTCAAGGTTGTTAGAAATTTAGGCAAATTACGACATAAT  
TTAATCCAGAAATTACCAATTAATAATCATGACAAGGGTTGTGCTAGTACTATTCAATTTTT  
AGAACACTAAACAGTGTAACATACTCTATGAACAATACTGTAAAGATCAGGAACAAAA  
TGTATACCCAGAGGCGGGGCCAGTGCCAGAGGCACCGGATGCGCCGTTCTGCTCAGT  
TGACATAAGCAGCTATTTCGATGTAGTCGATCTCAGTTGGTGCAGGACGAGGTACGCAG  
TGCAGTCCCTTGAACGGCCTTCTGGAAGTAGTTGTACTTGCCGTGTAATGGAATGCCGC  
CGGGAATTAGCCGATCACGTCGTGTATAGAAGCGAGCAGTCGTGCTGAGCACTCCCCA  
AAAACCTGATCGCCCGCCTATCCGTGCAGATGTCACAGCTGGACGTGGTTTTGGAGGC  
CTGCTCTCCCAAACGCCTGTGCGCGCAGGAGCTGGGACGGGGAAAACTCGGAGGAG  
CAGCTCAACAGAGAGGAGAAGGTGTGGTTTCTGTGTCTCGCTCGAGGCTACTGTGCGAC  
TCCCAAGCTTATACGCGTGCCAAGAAGATGAAGAGACAGGAAGCGTTACCGGGACAG  
GGAGTAATCGCAAGTAACGGACAGTAACCTCTCGCACAATTACTACTTGAAACCGACGG  
AATCAATTCCGGTAACCTGCTCACTTAATGCCTTCATCAATCCATGCACTTAGCATTAAAT  
ATGGGCCTTAGAATTTATTTGATTTAATTGTTGAATTAATAAATGGACCAAGCTCAAATTA  
AATCCAACAATCCCCACCAAATTCTAGGGCACATATGAAATACTCTCAATTCTCTGTTAT  
TTGATATACCAGTGTTTCGATGGAGACTGTTAAGTTGAACATCCACCTAGAACAAAGGT  
TACACTTTTTTCACAACTGAACAATGGACTATGCCTTGAATTGACGGTTTTGTGCGAAAT  
AAGTTTCACCTAAGTCCTTTACTGATACTAGGCTGCCTAAAGCATCCCCCTCTGGTTGGA  
GCATATAAGTCAAACCTCCTTGGCCTTTCATGAGTATCTAGAGATCACCCAAATCTCATAG  
ACTGTGACCAGCAGTCAAACCTCATATAGGTGTGTGTTCCCTCATAAGATGTTCTGTAGGA  
CAACATCTCTGCTTCAACAAGCCACTCGGATCACATTAAGGTATAAACCAACCTGCCTT  
ACAGGATAGGAGAGAAGTGATCTCATACGACATGGACCTTGTTAAGGGTCTCTCCTC  
ACAGTCTACCACTAGCTTGTTTCACCATCCTACTTCACGGGATCTCCGATCACATAGGA  
CAGGTTACCACTATGATAGACTTCACGTGGGTCTCAAGCCCATCTCACTCGATGCACTA  
TCTATCACATTACGTGACAAACCCTTAGTGAATTGATCTGCCAGATTCTTAGACGTATGG  
ACATAGTCCAATGCTATCACTCCGGAGTTTCTCAATTTCCCTGACAGATTTCAACCGCCT  
CTTTATATGCCTTGTTGACTTCATGTTGTCCTTAGAACTGTTCACTTTGACAATCACCGT  
CTGATTATCACAGTTCATAGAAATAGCCGGTATAGGTTTTTCAACCACCGGTAAATCCAT  
AAGGAGTTCACGAAGCCATTCAGCCTCAACAGTGGCGGTATCCAATGCTGTGAGTTCT  
GCTTCCATTGTTGACCTCGTTAAGATGGTCTGCTTGCAAGACTTCCATGAAACAGCGCC  
ACCTCCAAGTGTAACACATATCCACTTGTGGCATAAATCTCATCAGCATCAGATATCCA  
ATTGGAATCACTATAACCCTCAAGTACCCTTGGATACCCAGCATAGTGAATCCCATAGCT  
CATAGTACCTTTTAAATAGCGCATCACTCTCTCAAGAGCACGCCAGTGATCATCTCCCG  
GATTTGATACAAACCGGCTTAGTTTGCTCACAGCAAATGAGATGTCAGGTCTCGTTGCG  
CTAGCTAGATACATAAGTGAGCCAATGATTTGGGAGTATCTTAATTGATCCCTTGCTATT  
CTTCGATTTTTCTTAATAGCACACTAGGATCATAAGGCGTTGGAGCAGGTTTGCAATC  
ACTATACCCAAAGCGACTCAACACCTTTTCCACATAGTGAGATTGCAGAAGTGTACC  
CCACCATTCCTTCTCTCAGTAGCTTGATATTAAGAATAACATCAGCTACTCCCAAATCC  
TTCATCTCAAAATTATTGGACAAAAAGTCCTTAATCTCCTTAATCACATTAAGGCTGGTT  
CCAAAGATCAGTATGTCGTCAACATACAAACACAAGATCACACCTTACCCCCGCCATA  
GCGATAGTACACACATTTATCAGCTTCATTCACAACAAAGCCAGCAGACGTTAATGTTT  
TATCGAACTTCTCATGCCATTGCTTAGGCGCTTGCTTCAGGCCATACAAAGACTTCAAT  
AATTTACACACCATGCCTTCTTGACCATTTGCTACAAACCCATCTGGCTGATCCATATAA  
ATCTCCTCCTCTAACTCCCCATTTAGGAAAGCTGTCTTAACGTCCATCTGATGAACGAG

AAGACCATGAGAGGCTGCCAAGGAAAGTAATACTCGAATTGTGGTCAATCGAGCAAC  
AGGTGAATAAGTATCAAAGAAATCTTCGCCTTCTTTTTGGGTGTAACCCCTGGCCACAA  
GCCTTGCCCTGTACTTTTCAATAGTACCATCAGGCCTAAGCTTTTTCTTGAACACCCATT  
TGCAACCTACAGGTTTGCACCCGTAAGGACGATCAATGACTTCCCAAGTTCCATTAGAC  
ATAATAGAATCCATCTCACTCCGTA CTGCTTCCTTCCAAAAGTCAGCATCAGGAGAAGA  
ATATGCCTCTTCAATGGTTCTTGGAGTGTATCCACAAGGTACACAATGTAGTCATCAC  
CAAAAGACTTTGCAGTCCTTTGTCTCTTACTCTTTCGAGCGACTACACTGTCATCCTCC  
TCAGGATTTTGCACACGGGTTTCTCAAAGTGTTCTATCGAAATATGTTGCTCATGGGG  
TATTATAGGTTTCATGACTAAACGTGCTAGGTGATTCTTTCATAGGAAATTCATTCTCAAA  
AAATGTAGCATCTCTGGACTCCATAATAGTACCAACATGCATGTCAGGTACTTCAGAGT  
TTTATTAAAAACCTATATCCCACGCTGTGTATAGCATAACCAAGGAAAACACAATCAAC  
AGTTTTAGGTCCAAGTTTTCGCTTTTTGTGATTGGCACATTCACCTTGGCCAAGCAAC  
CCCAAGTGCGCAAGTAGGAGAGATTCAATCTTTCTTTTCCCATTCTCTCGAATGGTGTA  
ATTTCTTTATTCTTTGTAGGAACTCTATTAGGACATGACAAGCAGTCAATATAGCCTCA  
CCCCACCATTCCTTAGATAGTCCCGCTGTCTCTAACATGGCATTAAACCAACTCAGTTAG  
AGTGCGATTCTTTCTTTTCGGCAATCCCATTGATTGTGGTGAGTATGGCGGTGTCCTTTC  
ATGAATAATTCCATATTCCATGCAGAATTCAGAAAATTCATTTGAAAAATACTCTCCACC  
GCGATCAGATCTTAACCGTTAATTTTCTCTCAAGTTGATTTTCTACTTCAGCTTTATAG  
ATCTTAAAATAATTTAACGCTTCATCTTTTGATTTTAGCAAGTACACGTAGCAAAATCTA  
GTACAATCATCTATAAGTGTATGAAATATCTTTTGCCACCTTTAGTCAACTCGCCGTTTC  
ATCTCGCACAAATCAGAATGAAGTAGTTCTAATGGTGCCAAGTTCTCTCGCCTCTGCTGC  
CTTGTGAGGCTTGCGAGGTTGCTTAGATTGCACACACACATGGCACTTAGAATCTTTGA  
CTAAAGTAAATTTCTGGGATTAAATTCAGATTTGCTAGCCGCGTCAAACAGCCAAAATTA  
ACATGACAAAGCCGTGAATGCCAAATGTTTCGATTCATTCGAATTAGTAACATTGTTTGC  
AACATTATTACACACATCAGACAAAGATAAGCGGAACAAGCCTCCGCAATCATAACCTT  
TTCCAACAAATGTCCATACTTAGAAAGTACACATTTATTTCGATTCAAAGACTAATTTAA  
AACCATCTCTACATAGTAGAGAGCCGCTAACTAGATTCTTTTTGATAGAGGGGACATGC  
TGCACGTTCTTTAATTGCACGGTCTTTCCCGAAGTGAGCTTCAGAATAACCGTACCAGC  
ACCAAGAACACGCGCATGCGATCCGTTCCCCATCAGCAAGGTTCCAGTCCCGCCATTTC  
TGGTAAGAAGAAAACAAAGAAATATCAGCACACACATGAATATTAGCTCCAGTATCCAT  
CCACCACTCAGGCGAATGACAGACTGAAAGAACAGTAGGTAAAGAATTACCATACCCC  
GATGTTCTCTGCATCAGTCTCGCTAACAACCATGTTTGCAGACTTCTTGTCTGCTTAAAT  
TTGCGGTCTGGGCACTCACTTGCCCAGTGATCTCTCGTCCCGCAAACAAAGCAGTTCC  
CTTTGTTCTTTTTCTTCTTAAACGTGGTTGTTTGCTTAGTCTTTGGTTTGTCTCTTGCTT  
GTTCTTCTTCTTCTGGTTGCGAGAAGCATTGAAGTTTTTCTTCTGCACCAAATTGGCAC  
TAGAAGACTCAACTCCTTTCCACGAGTGTCTTTTGCCCTCGCCTTCTCCTCAACATCA  
AGAGACCCAATGAGGTCAGCGACACTGAACTCTTGTCTCTTGTGTTTTAGAGAAGTGG  
CAAAATCCCTCCAAGAAGGTGGTAACTTGGCGATAATACCGCCAGCCACAACTTGTC  
GGGTAACACGCATGGAAAATGCTCGAGTTCCTTTGCCAGTGCATGTATCTCATGAGCCT  
GTTCCACTACAGATCGGTTATCAACCATCTTGTAGTCATACAGCTGCTCCATGACGTACA  
GCTCACTACCAGCATCGGAAATACCAAACCTTTTTCTCAAGTGCTTCCCACATCTCTTTG  
CCAGACGGCAGTAACATGTAGACGTCCACTATGTTTTAGCGAGAACGCTAACCACAG  
CGCCTCGAAACAGGTTATCAGCAACCTTGAACATTTTCTCCTCCTCTGGAGTAAATTGT  
TCAGGAAGCCCCTGCACGACGTGGTAAACGCTCATAGCCGTCAACCACAGGACCATCT

TAGCACGCCACCGCTTGTAATTTGAACCATCAAATGTATTCGGCTTAAGAGCAGCAGCA  
AAACCACTAACCGAAAAAGTGCCTAAAATCAGGTTTTTGGATTGTTAGAAATTTAGGCA  
AATTACGACATAATTTAATCCAGAAATTACCAATTAATAATCATGACAAGGGTTGTGCTA  
GTACTATTCAATTTTGTAGAACACTAAACAGTGTAACCTAATCTATGAACAATACTGTAAAG  
ATCAGGAACAAAATGTTATACCCAGAGGCGGGGCCAGTGCCAGAGGCACCGGATGC  
GCCGTTCTGCTCAGTTGACATAAGCAGCTATTCGATGTAGTCGATCTCAGTTGGTGCAG  
GACGAGGTACGCAGTGCAGTCCCTTGAACGGCCTTCTGGAAGTAGTTGTACTTGCCGT  
GTAATGGAATGCCGCCGGAATTAGCCGATCACGTCGTGTATAGAAGCGAGCAGTCGT  
GCTGAGCACTCCCCAAAAACCTGATCGCCCGCCTATCCGTGCAGATGTCACAGCTGGA  
CGTGTTTTTGGAGGCCTGCTCTCCCAAACGCCTGTGCGCGCAGGAGCTGGGACGGGG  
AAAAACTCGGAGGAGCAGCTCAACAGAGAGGAGAAGGTGTGGTTTTCTGTGTCTCGCT  
CGAGGCTACTGTCGACTCCCAAGCTTATACGCGTGCCAAGAAGATGAAGAGACAGGA  
AGCGTTACCGGGACAGGGAGTAATCGCAAGTAACGGACAGTAACCTCTCGCACAATTAC  
TACTTGAAACCGACGGAATCAATTCGGGTAACCTGCTCACTTAATGCCTTCATCAATCCA  
TGCACTTAGCATTTAATATGGGCCTTAGAATTTATTTGATTAAATTGTTGAATTAATAATG  
GACCAAGCTCAAATTAAATCCAACAAAGGTGACGGGCGCCAGGAACACTATCGAGGT  
CGGCGTCTTACCGGCTACTCTGTCTCGCCACCGCGCTCGCCATCCCCGACGACGGC  
AAGATCGTCGCCATCGACGTCAGCAGGGAGTACTTCGACCTCGGCCTGCCCGTCATCG  
AGAAGGCCGGCGTCGCGCACAAGGTCGACTGTGACGACCCGCATTATTACCATTGGGT  
AATAACGCCAGTCAACAGATTATTATTCGTTTTAGCTGATAAAACATCGCTCTAACGAAT  
AATAAACCTATCAGAGTGTTGCAGCAGAACAATAATTAGAGACACAATATGATATTACA  
ATAATATCGCCTCGCAGGGCTACATTGATTACAATGCCTCAAGGGCTTAAATATTACAA  
TCTTTAGACAAAATATTCTAACTATTTCCCTATTCAAACAACCTCCACACGGAGTGTCCACC  
TGATACCCACTGTGTTCCGTGTCTACGGTATCCCATCCAGGTAACCTTCCTCCTGATCTTA  
GCCATCCCCTGATCTGACATGCTCCTAAGCAAAGGGGGAGATAATAGCAAGAGTGAGT  
ACAGAAGTACTCAGCAAGCATTAATAGCAAAAATGCACAGAATGCTTATCATTTGCACT  
TTTAGGAACATCAATTCCTCTATTCCATCTCATGCTCATTACATAACATTCTTTTTTCATCAT  
CAATTCCCTTTCCAGGACTTGTAGAAAATACAGATTGTTGGTTTTGAAAGAATTCCAAT  
TTATTAATTTAGAAAACACTACTGAACATACGCATGAACAGCAAAAACCTCCATAAGTTTC  
CGTAATTCTCCTTTCCCGGAGACAGGCATGAATTCATGATTTTCAATAGCATTGCGCAA  
GCTTGTATCACTTTACCCATCACCCTCTTGATCCTGGTGGCTCATGGTTCTCCGCAATT  
CCTTAGATGCGGCGCCAGATCAGAGCACAGTACGTTTGCATCTATCTTAGTAATTATAT  
CTCCACCCAGTTACTCACAATCGGTAGCCTGGAGCGGTGTACCACCCTCACGCAGACC  
CACCGAAAGCGACATTAACCTGTTGGCTGGGGCGGTTCCCGACCATCTCCCAACACTCC  
ACGGCGTAATATATCGCCCATCGCTTACCCGTTGCTGATAACGAACCAGTCTTGGGTTCT  
TGCGATCCGCCTCACCCGTTGCTGATAACGAACCAGTCTTGGGTTGCGCGAGGCTGTG  
GATAGCCCACCTTGCTGATAACGAACCAGTCTTGTGGGTTCCACTCCCTAACTAATACT  
TACCCATGTGGAGAATATAATACTTTGATAGAGCTACTAGTCTGTCCGTCCTCAAACGG  
AATGTTGGTTGATACGTTTTGGTACGGTCGGTTCACACGGATGAAGTTGGTAATCCCTT  
ATATTCTATTCTATGCAGAGGTTCCACTCCTGCCCCCTTATCCCTTGCCCTGGCAACCT  
CTGCCCACCCTCTTAATTAACCTAGATGGCCAACCTGCTCCATCAGTTGCCATCTATTTCT  
TTTCTCATATCTCTTCTGTCCACTGCTCGAATTAAATATCTTTTATTCCTTTTCATGCAGGG  
TGAGATTAGAGTAATACAAAATACTTGTTTTTACAAAAGATACTCTGAAGCTTTGATCA  
AAGGAATGCTTGCCTGGACTTTAACCATACTCGGATTCAAGTAGGATCAGGTGAAGT

TGTCGCCGTAGCTTGGATTGTGGCCTGCAATTAAATACGTTGGCTACGACTTAATTAGC  
GGTGCATTAAATTAAATCGGCATACGTTATGCTTTTACTCTATCGCTGGTAAATTATTTAAT  
CTAATCATTATAAATACTGATTAGCGGATTTCTATTGCTTTGATGATTAAACCAATTTATCT  
GCGTATTCAAGTCTGCAACTAAAAGGGTCTTAAACTATAGTACTTTAATTAAATCCTTAG  
GCGTACAGGTTTAATCGACGTATACTTTTCATCGTTGGACCACAATTAGTTTGTCTAAT  
ATTATGAAGAACTCAGGGTGAATTTCTATAGTTTAACTATTATTACCCAAACCGTCTAAG  
TAATGGAATATATTGATGAGCGGTTTAAATAACAATACACAGGTAAAGAGTATACACATG  
GATCCATTCTAATCAATTGACGTTTTGGTTTATTTATGGGATCCTAAATATTTATTAATAGA  
ATTCCACAAGTTTATACTACCAACAATGTTAAATAGATATTACTTAGGAATTTTAATAATT  
TGCACGGCAATGTATCGATTCAATCGGTACTCGCCAAATTTTAATCTACTGCCTATCCTT  
AATTAATCATGACTACTGATTTGAGTTAATTTGTATTTTAGCATGATTAGAATAATAATAA  
TAGGTTTTTTTTTAATCTACACTAGCTTAGTTAAAGTTAAATATTCACAAGACTGATTTTAA  
TTATGCGCGCTTCTCCTCTCTCTCTCTCTCTCTTTTTTTTTCTCTTCTTCCGCCCGACCCC  
TCCTTTTTCTCTGCCGACGCCTCTCCATCCCCCCTCCTTTTCTTCTTCTCTCGCTCGG  
CCTCTCTGCTCTTCTCCTCACGCCGCCTCTCCCTCGCCTCCGTGCCTCAGCGCCGCCGC  
CCGTTTTGGCTCCCCCTACGCGCCGCCTCTCTCGCGCCCCGCGCCTCGGCGCCTCTGCC  
TCGGTGCCGCTCCCCCTACGCGGGCTCCCCGCCGACGCCTCCTCTGGCCGGCCGTTCT  
CCGCCGAGATGACCGGCGCCGCTTGGAATCTCCGGCCAGATCTGGCCCACTCGGATG  
CTCCTCCTCCTTTTTCCCAATTTCTTTGCGTGATTTACTTTTGTGATTTGCTAACGTGTGG  
GGTTTTTGCCTAGGGTGTGGTATTGGGAGGCGGGTGACCGTGCCGTCTCTGCCCGGTG  
AGCCGTCGCCATGCGCCGGGGGAGTACTGGCGGCGGTGAACCGGTGGCTCGGCCGTG  
ACTCCCGCAGCCGCCGCCCTCCAATCCTTCCCTTCCCTTTGTCCCCCCCCCCCCCGCAC  
GAGAGTAGTGGGTAACCCCTCTTCTCTCCTTCATGCTACTTCCGGTGATATGCTTATGGT  
TCATGTGTTCTATTGTGGATGAATGCTTATGGTTGCTACTTGCTAGCCTATGTTGGATGG  
AATGGAATAATGGCATTGCATAGATGTTGGGCTTTTGGGGTTTACCTGCACTGGTGCCT  
GTGCGGGATGCTAGGGTTTGGGGTTGGGGTGGTGGTCGATTGACGGTGGCTGAGGCTT  
GCTGCTGGCTTGCGGTTCTCCTGTGGCCGTCACGTCCCCATCTTCTTTCGGCTTGTGCG  
TTCTTCACTCCCTGGCCTTCGGCTCCACTTGGTGACGATGCCTCTGCGGTCTGGGGATT  
GGCTGGAAGAATTTGGGGAATGTTACCTTACCTTGCTTTGTCCCTCTGTGCTCTTTCT  
CTCGGGTTGGCTACTGGTATGCAGTGTGGGATATTGTGGTGGATGGCTTGCCCGTGAGG  
CTTTGTTGGCTGCCGATACTCCCTGGGCGTGTTGCTCTGGCCCGGTGCTATCTGATTC  
ACTGTGATGGATATTTGCATGGTGAGGGCTTTGACAGGTGTTTTCTCTGTTGTAGGTTT  
GGCTGGGATGATTTGTGCTCACCTAGCCTTTGCCTTGTTGGATTCTATATTCAAACA  
GGTTTTGTATATATATATATACCGTGTGATGAGCCTATGGTTGTGAGAGGTGCCGACTGGC  
CCCCGGACGGTCAGGTATCTCTGTGAACGGATTACCCCGCCGAAGTTAATCCTTAGGG  
CTCTGACGGCAACACTTCTTTTATATTTCCCTATTTTCAATTACTCTTTTGTGTTGGTCTTT  
TTCGGTATTATAATTTGATTGTTTAAATCACAAATGAATAACGAGGTAACGGCAACTCGAC  
GATAGTCTGATCCATGTATGAAATGGCCTAAATTGTAATCGGGCTTTCTCTTAATATTGAT  
GTATACAAAATATTGTATGTTACTCGAATGTAGTTTCTAATGTTGCAATTGTGTTGCAATT  
ATCTAAGTTTTCGAGACGGTCATTTGATTAAAGACTGAGACTTGTAACCTTACAGTAATT  
TGTATTGTCGTTATTAATGTAAAAAGAGTTGTAATATCTTTATTTAATTTAGGCCAGTTTT  
AGTTGTAGCTCAAGGGATGTGACTTGATTTGTTGTCCAAGAATTGTAATAATTACACAA  
TTGTATTACGGACTGTTATATATATTTTTAATTGACTTGAAAGTTTTTTATTTGTGCTGCAAG  
TATATTTTATCTAGCTCTAGTCTTTACAATTTGGTCTGCGTCTCATCGACGGAATTACCG

TAGTAACGTATTTCGTTTATCGTTTCGTTGGTTTCAATGTATACGGTTACGTAGAAAAAGTT  
TAAATTTCTCGTATTTTTTTTAGATTATCATTTATGTAATTAATCCTACTTAACGTCCTAA  
TTCGCTAATTATGGTTAATTAACGACGTGGGTCGTTACACACTTCCCTCCTTAAAAATGA  
TTTCGTCCTCGAAATCGGAAATGGCTTAAGAAGGTTGTAGTAGGTCTCTTATTGATCATT  
TACGAAACGTGATTTTAGATATTCCTATTTATTCCGCCTTTTTGTAGATACACTTCCTATG  
CTTGATCGCTCGTTGACTCCTCACATGTCATCGCTGAAATTCGATATCAAGCTATAGGT  
TATCGGTTATCGTTACTAGGGATTTGGTAGCATTAGGATTGGAATTATAATTCATGTTAAG  
GTAGGAAAATCGTTCAATTTATTCTATGTTGCACCGGTTAGTATTCTCCTTTTTCTACCCA  
TTGCCCCTTCCCTCCTTAATTCCTTAGCTACCCCTCGATTCCTTAGCTGGTCTACTGAA  
GTGCGCTAGTTGATAGTTTAGTAGTGTGGTTCAAAGAAAGCGGTGTTGCTTAAAGCAAT  
TGGGTTGAAAAGAAATCTCATGGTAGGAAGATTTAGGATTAGATTAGTATTATCCTAGTT  
TCCTGGCATTGTACTTTGGCTATTTAAGGGTTGGGAAATATCGTTACTTCCTATTCGGAT  
GGCATAATGGTGTCTGAAATTTGGATTGAAACTCTGTCTACGGGACTAGCTCTTTAGC  
CGTGGTTTAGCTCTTCGGAATTGAACAGCTCTCCCTAGACTAATAGGCAGGCTGTGAG  
ATTTATGGGTTACACAGAGGGGTATGGTATTGCCATACGATCTTGAGTTCAGTTGATGAT  
AGATCAATGATATTGAAAGAGTGGACATTTCCCTTATTCATAATATATGTCCTCATGGA  
ATGCATGAAATAAAGTTTTCCAAAAGCTTTAAACACTATGGTGCAAGAAATATTTATATA  
GAATGATGCAAAGAGGTTTTGTGAAAATACTTATTTCTAATGTCATGTTGAAACATTTT  
CGTTTGCAGAATTTCATTTTATGAGCTCATGGTCAATGTCATGCCCCGGGAATTATGCCA  
AAAGTTCCTGAAATCATATATTTATGAACCTGGGGAAATGCACCAGACATAGACAATAA  
TATTTAGTGGATGCTTTAAACAGATCATGGATGCCGAGGTGATTAACACCGCAACAG  
GCTTAGACTTAGAAGCCTAGGGGTTGACGGTTCAGGTCTGAATTAAACAAAGAGACAC  
AGGTAGCTATGAACCTATTCCTCGGTTTGACACCAGAGTGGCTACGTGTCTAACTATA  
CACTCAAAAAGAGCTAGGACAAAATAAAGGAATGTTTCTTTGGGAAGTTTAAAGGATAT  
ACTACTCGGGAAAAGACTCGAATAACCCCCATTACGATTGGGCTATCTATGATCCAAAA  
GATGAAGAATAGGTAGCCTAATTTAATCCGGTTACGCTCTAGGGACGTCTCACCTAAG  
TTACGTGCTCCGTAAAAGAAAATGGATAGTGGCGCATATATTATCTACAGTCGGTCTCGT  
AACAACTCGTCTAAGTTTAGTAGTCCAGGTAATTCTATATAACCGGCTTTTAGAAATAAT  
AAGGAATTCGAACATTTTCCTATATTACGGACTAGGCTCTAGATTTTTTTTTTCACTGGT  
TTAATGTGATGGTTCCGTATACACTTAGTCACCTCATTTAAGTTGTAGTTAAATTTAGG  
GAATTATATTTTCGAAAATACCTGCATATCATGACGTTATTAAATTTCTGACGCAAGTT  
GTTACAAGAGGTACGAACAAAATTTTATTCATGTTGTAGACCCAGGTTTTCTTATTAGT  
ATTCAGCATGCAAATAGATGAGAATTTATTTATGTTCAAGTAGTAGAAAGCCGCATTACT  
CCCTCTCGGTTATTGGTCTTCACATCACAGCATACATTAGGCAAATAAAACCCAAGA  
AACATAGAGATGCAAAAAGAATCAACTCCTACACTACTCTGGGACTACGCGCCCAGCT  
ACGCCCCGAGAACTCGCTCTCGAGACCGCCCAAATCTTTCGCGTTTGGGACCACGCTCA  
GAGCTTGCCTCTGAGTGCGAACCTACACTACCCTGGATCTCCGCGCCCAGGCACGCCT  
AAGAACTCGCTCTCAGGATCGCCCAAACTTTTCGCGTTTGGAAACCACGCTCAGGGCTC  
ATCCCTGAGTACGCCCAGGACTTCGTTCTGGGTACGCCCGAACTTACGCGTTTCGGG  
AGCGCCACGGACCACTCGTCCGGGAAATCTCATATGCAGAAATGGGGTAAAGCAATTT  
TTTTTAGTGGACCATACATCTTGCCATCTTAGTACCTTTGCTCTAAAATTCATACTCTCCT  
TGCTTAGCTGTCTAAGATGGCAAGGTGTTTAATTTAGTTCTCAGATTGAAAGAGATAAG  
AAGTTATGATAGGATGGTCTCTACATCACTTTTACTTGCTAACACTCAAGTTTTCTA  
TCCTAGGTTGCAAAATGAAAGTTCTGGACAGCAACATGCATGTAACAAAATGAATTG

AGTACAGGAAGTAAAAATAGGTAATTGCTATAATTTTCGATCATTCTACACCTCCTATTCA  
TATTACTTACAACCCCAGGTATATACTAGCATGCATGGCCAAGATGATTATTCCTAGCATA  
ATACTACCATTACATTTATGTTTCTCAAGTTAGCAAACATTAAATTTGTAATTTTCAGCCC  
ACTACTACCCAAAATTTATACTTTTAGATATGACAAAATGAAACTACCTCAATCCTGCTC  
ATATTTGTCTTCGATTGCCCTATGTCGCTATGGTTAAGAAAATACAACAATCATAATTAA  
CTGAAATGCAATAAGTCAAATGCGGAATACCTAATTGCAGCAAAATTAATGTTAAATT  
CGTAATTAACATTATATTGCTTACCAACTAATACTACAGTTTTGTAAACAAACACTGTTA  
CCGATGAAAAGCAACTAGTAACATAATTTAAATTGTCATAACTATTATTACCACCGTTCC  
CATCCTCACTACCCATTCTGGCTCTAAAAATATGCGATGATTTAAAAGTAACGATGCTTA  
AACCTAGAGCTAACCACATAAGAAAGGATGTACAGATGAGATGTATTAAAGGAGATGT  
ATTGCCATATAGCAAGGATCACCTCCTTAAGTCAAGAAACAGTCTCTAATGATTTGCGT  
GGCCCTCAAACCATTGCTCTGATACCACCTGTGACGACCCGCATTATTACCATTGGGTA  
ATAACGCCAGTCAACAGATTATTATTCGTTTTAGCTGATAAAACATCGCTCTAACGAATA  
ATAAACCTATCAGAGTGTTGCAGCAGAACAATAATTAGAGACACAATATGATATTACAA  
TAATATCGCCTCGCAGGGCTACATTCGATTACAATGCCTCAAGGGCTTAAATATTACAAT  
CTTTAGACAAAATATTCTAACTATTTCTATTCAAACAACCTCCACACGGAGTGCCACCT  
GATACCCACTGTGTTCCGTGTCTACGGTATCCCATCCAGGTAACCTCCTCCTGATCTTAG  
CCATCCCCTGATCTGACATGCTCCTAAGCAAAGGGGGAGATAATAGCAAGAGTGAGTA  
CAGAAGTACTCAGCAAGCGTTAATAGCAAAAATGCACAGAATGCTTATCATTGCACTT  
TTAGGAACATCAATTCCTCTATTCCATCTCATGCTCATTACATAACATTCTTTTTTCATCATC  
AATTCCTTTCCAGGACTTGTAGAAAATACAGATTGTTGGTTTTGAAAGAATTCCAATT  
TATTAATTTAGAAAACACTACTGAACATACGCATGAACAGCAAAAACCTCCATAAGTTTCC  
GTAATTCCTCTTTCCCGGAGACAGGCATGAATTCATGATTTTCAATAGCATTGCGCAAG  
CTTGATCACTTTACCCATCACCACTCTTGATCCTGGTGGCTCATGGTTCTCCGCAATTC  
CTTAGATGCGGCGCCCAGATCAGAGCACAGTACGTTTGCATCTATCTTAGTAATTATATC  
TCCACCCAGTTACTCACAATCGGTAGCCTGGAGCGGTGTACCACCCTCACGCAGACGT  
ATACTTTTCATCGTCGGACCACAATTAGTTTGTTCCTAATATTATGAAGAACTCAGGGTGA  
ATTTCTATAGTTTAACTATTATTACCCAAACCGTCTAAGTAATGGAATATATTGATGAGCG  
GTTTAAATAACAATACACAGGTAAAGAGTATACACATGGATCCATTCTAATCAATTGACG  
TTTTGGTTTTATTTATGGGATCCTAAATATTTATTAATAGAATTCCACAAGTTTATACTACCA  
ACAATGTAAATAGATATTACTTAGGAATTTTAATAATTTGCACGGCAATGTATCGATTCA  
ATCGGTACTCGCCAAATTTTAATCTACTGCCTATCCTTAATTAATCATGACTACTGATTTG  
AGTTAATTTGTATTTTAGCATGATTAGAATAATAATAATAGGTTTTTTTTTAATCTACACTA  
GCTTAGTTAAAGTTAAATATTACAAAGACTGATTTTTATTATGCGCGCTTCTCCTCTCTCT  
TCTCTCTCTTTTTTTTTCTCTTTCTTCCGCCCCGACCCCTCCTTTTTCTCTGCCGACGCCT  
CTCCATCCCCCCTCCTTTTCTTCTTTCTCGCTCGGCCTCTCTGCTCTTCTCCTCACGC  
CGCCTCTCCCTCGCCTCCGTGCCTCAGCGCCGCGCCGCGGTTTGGCTCCCTCACGCG  
CCGCCTCTCTCTCGCGCCCGCGCCTCGGCGCCTCTGCCTCGGTGCCGCTCCCCCTCAC  
GCCGGCTCCCCGCCGACGCCTCCTCTGGCCGGCCGTTCCCGCCGAGATGACCGGCGCC  
GCTTGGGAATCTCCGGCCAGATCTGGCCCACTCGGATGCTCCTCCTCCTTTTTCCCCAT  
TTCTTTGCGTGATTTACATTTGTGATTTGCTAACGTGTGGGGTTTTTGCCTAGGGTGTGG  
TATTGGGAGGCGGGTGACCGTGGCCGTCCTCGCCGGTGAGCCGTCGCCATGCGCCGGG  
GGAGTACTGGCGGCGGTGAACCGGTGGCTCGGCCGTGACTCCCGCAGCCGCCGCCCT  
CACGGTAACCCTCTTCTCTCCTCTGCTACTTCCGGTGATATGCTTATGGTTCATGTGTTT

TATTGTGGATGAATGCTTATGGTTGCTACTTGCTAGCCTATGTTGGATGGAATGGAATAA  
TGGCATTGCATAGATGTTGGGCTTTTGGGGTTTACCTGCACTGGTGCCTGTGCGGGATG  
CTAGGGTTTGGGGTTGGGGTGGTGGTCGATTGACGGTGGCTGAGGCTTGCTGCTGGCT  
TGCGGTTCTCCTGTGGCCGTCACGTCCCCATCTTCCTTCGGCTTGTCGGTTCTTCACTC  
CCTGGCCTTCGGCTCCACTTGGTGACGATGCCTCTGCGGTCTGGGGATTGGCTGGAAG  
AATTTGGGGAATGTTACCTTACCTTGCTTTGTCCCTCTGTGCTCTTTCCTCTCGGGTTGG  
CTACTGGTATGCAGTGTGGGATATTGTGGTGGATGGCTTGCCCGTGAGGCTTTGTTGGC  
TGCCGATACTCCCTGGGCGTGGTTGCTCTGGCCCGGTGCTATCTGATTCAGTGTGATGG  
ATATTTGCATGGTGAGGGCTTTGACAGGTGTTTTCTCTGTTGTAGGTTTGGCTGGGATG  
ATTTGTGCTCACCTAGCCTTTGCCTTGGTTGGATTCCCTATATTCAAAACAGGTTTGTATAT  
ATATATATATACCGTGTGATGAGCCTATGGTTGTGAGAGGTGCCGACTGGCCCCCGGAC  
GGTCAGGTATCTCTGTGAACGGATTACCCCGCCCGAAGTTAATCCTTAGGGCTCTGACG  
GCAACACTTCTTTTATATTTTCCTTATTTTCAATTACTCTTTTGTTTGGTCTTTTTCGGTATT  
ATAATTTGATTGTTTAATCACAAATGAATAACGAGGTAACGGCAACTCGACGATAGTCT  
GATCCATGTATGAAATGGCCTAAATTGTAATCGGGCTTTCTCTTAATATTGATGTATACAG  
AATATTGTATGTTACTCGAATGTAGTTTCTAATGTTGCAATTGTGTTGCAATTATCTAAGT  
TTGCGAGACGGTCATTTGATTAAGACTGAGACTTGTAACCTTACAGTAATTTGTATTGT  
CGTTATTAATGTAAAAAGAGTTGTAATATCTTTATTTAATTTAGGCCAGTTTGTAGTGTAG  
CTCAAGGGATGTGACTTGATTTGTTGTCCAAGAATTGTAATAATTACACAATTGTATTAC  
GGACTGTTATATATATTTTAATTGACTTGAAAGTTTTTATTTGTCGTGCAAGTATATTTTAT  
CTAGCTCTAGTCTTTACAATTTGGTCTGCGTCCTCATCGACGGAATTACGGTAGTAACGT  
ATTCGTTTATCGTTCGTTGGTTTCAATGTATACGGTTACGTAGAAAAAGTTTAAATTTCC  
TCGTATTTTTTTAGATTATCATTATGTAATTAATCCTACTTAACGTCCTAATTCGCTAATT  
ATGGTTAATTAACGACGTGGGTGCTTACATCGACTTCCGCGAGGGCCCCGCTCAGCCC  
ATCCTCGACAAGCTGCTCTCCGAAGTACGTACGGGATCAGCCACCGCCACCGGGTCTT  
TCTTGATGACCCATGCATTTACCCAATGCCGCCGGCCTGTGGCTTCAACGGTCGCCATA  
ATTACTTGCTCATCGATGTGATCTTGGTGCGTGCGTGAGGAGGGTAACGAGGGGAAG  
TTCGGCTTCGCCTTCGTGGACGCCGACAAGGGGAACCTACGGCAACTACCACGAGCAG  
CTGCTGCGGTTGGTGCGAGTCGGCGGCGTGCTCGCCTACGACAACACGCTCTGGGGC  
GGCACCGTGGCACTGCCGGACGACACGCCGCTCACGGAGGACGACCGGGAGATCCGG  
GACTTCATCAGGGCGTTCAACGCCAAGATCGCCGCCGACCCGCGCGTCGAGGCCGTG  
CAGCTCCCGGTGCTGACGGCATCACGCTGTGCCGCCGCGTCGCC**TGA**

>DfCCoAOMT14 (DfaA11G016070)

TTTTGGATGGCCTGAAATAATAGCGCTTGGAATTAGAAGTTTGGTGTGTTGATTGGCTTT  
TAGTTAGACTGGCTGCCTGGGCTGATTGGGCTTTTAGTTAGATGGCCGCCTCATTGCCA  
CCTATTCGTCATCTTCGATTAAGTTGTGCAAAATCTTTCGTATCACTTTTTGTTCCAG  
ATTCACCTTTTACTTTTCTCTTGATGAATTTGATCTCCCCACGGTTCATCACCGGATTT  
GGGTCGTCTTCCTAGTCGCCATCGTCAAATTTCTCGCACTCGGTGAGCATCTCTGCAAT  
CCTTTGCACCTGTAGCATGAAATTTATCCGCTCTACCTTTTTCTACTTCAATTTGGTTG  
ATGTACTGCCATGGGGTGCTGCCACCACCACCATCTTGTTGAGCTCCAACCTACCGCCCA  
ATCTCCATCTCTGGTGAGCTTGCGTCGAACCCAACTGCATCATGACGTGTTCCACCTTC  
GTACCAATTATCATCCTCAGTTAATTGCATTCTCTCACAGTCATTCGCCGGAATCAAGCC  
ATCTTCCTCGTCATCGCCCAAACCGTCACCGCCCTAGATTTTCATCGCCGCTGGTGAGCT

ACTGCCATCATCAACCTCAACATCGTCTTTCTCATACCGCGTTCCACACCATGCTCACCT  
CGCCTATATTGGAACCCCTTAGGGGTGAAAACGGGTTCGGATTCGGACGGATATTGCTGTT  
ACCATATCCTAACCCATATTTTTTCTCCGGATTCGGTACCAATCGGATTCGGTACCAATC  
GGATTCGGTGTTCGGATCGGTTCGGGATTAACCCATTTTCGTTTGCACCCCTACTTGTTTGT  
AGGAATGCATACAGTGCAGTAAATGGAGTAGGACGCACTGACTTGATGTTACTATTTAA  
TAGCTGATGTGGAAGATTTTATTTTACCATTGCAAAAGAAAATGAAACGTCAAATAGTA  
GCACTAACCTGAAATCAAACCTGAAGATGTATCAGATTCGGACGGATATTCGGATTCGG  
ACGGATATTGCTGTTACCATATCCTAACCCATATTTTTTCTCCGGATTCGGTACTAGTTCGG  
ATTCGGTACCAATCGGATTCGGTGCCGGATCGGTTCGGGATTAACCCGACCCGTTTTTCAC  
CCCTAGGAACCCCTGCCGCCATCCGTCTTACCCTGGCTGCCGACCCCTACTCGTCGCCA  
GCGTCACCGTCGTGTAGGACCACTGCGACGCCAACAACTTGTTATGTTTCATTGGCCATG  
CCTTCTAGGCCGTCCTCGTCGAAGCCAATGCCAAAGCGGCTTCGAGAAGCCAACTGT  
GCAAAGCTACTTCTCACAAGAATATATAGTTTGATTGTTAGAGACTGGAAGCCGAAGCC  
GTTTCAGGAACGCGGCCTAGTTAGGCGGTGCACCCTGCGAGAGTCCCTCAACGAAAG  
AGTGATGCACGCACGGAAGCAGCCAAGCTGGCGCAGGGTAGGTGGGCGGGGCCCCAG  
CGTGGGCTCTACGGTGGGCCCCCCTCCCTCCATTACCCCTCCCGACGACCGTCCCGG  
TCCATTCCCCACCAGTCCGTTTCCCACCAACCCTCCCCGCTCGCCCCGCGCGAGAGAC  
CAACCCGCTCGCCGTATAGACGCGGTCCACGCAGCGAAGCCAGAGAGGCAGGAGGAG  
AGAAAAGTCTTTGCACCAATCGCAGTCCACCACCAACCCACCCTCCCCCTCCCCCTCGGA  
ATCGCTCACCAATCGTGCCATGTTCGCGGCCAACAAACGAGCGACACCAGCTCACCAACC  
CAAAGCTGTATTCTACCGACCGGTACGGGTCACTGACATGTGGGCCCCACAGGCTACT  
GTACCGCTCTCTCCTCTTGGGGTATTTTTGTGCTATTTTTTTCTTTTTTTTTTCCATTCTG  
GTAGTCGTCACGTCCAGTGTACCTGCCTTCCTACGCACAAGCCACATGCCTCTCCCGA  
TCAGTCCACTGCGCCGCGCTATATAAACCGCCCGTTTGCTTCCTCATCCCGGCAAGGTC  
AATCGAGCGAGCCGCGCATTAGTATTACTACACCCGGATCTCGTCTCCTCGAAGACCGG  
CAATGGCCACCGCGACCGCCGATGCGACGACGGCGACCAAGGAGCAAACCAGCGGC  
GGCGGCGGCGGCGGCGAGCAGAAGACGCGCCACTCCGAGGTTCGGGCACAAGAGCCT  
GCTCCAGAGCGACGCGCTCTACCAGTACATCCTGGAGACGAGCGTGTACCCGCGCGAG  
CACGAGTGCATGAAGGAGCTCCGCGAGGTCACCGCCAAGCACCCATGGTATGGTGCTT  
GTCCTCCTCCTCTCCTCTTCTTGATCTGAATCCGCGAGGTCACCGCCATGCGCGCGGCT  
TTAGTTAATGTCGGATCTTGCTTGACCTTGTCCTGCAGGAACCTGATGACGACGTCGG  
CGGACGAGGGGCAGTTCCTGAACATGCTGCTCAAGCTCATCGGCGCCAAGAAGACCA  
TGGAGATCGGCGTCTACACCGGCTACTCCCTCCTCGCCACCGCGCTCGCCATCCCCGA  
GGACGGCACGGTAAGTCCATGGATCGGCTAGCTACTACTTCCACGCGCGCCGCAGATC  
CCTAGATCTGGCGAGCTGAAACGATCGATGGCACTCGATATCTGCAGATCTTGGCCATG  
GACATCAACCGCGAGAACTACGAGCTCGGCCTGCCCTGCATCGAGAAGGCCGGCGTC  
GCCACAAGATCGACTTCCGCGAGGGCCCCGCACTCCCCGTCTCGACCAGCTCCTCG  
AGGACGAGGCCAACCACGGCTCGTTTCGACTTCGTCTTCGTTCGACGCCGACAAGGACA  
ACTACCTCAACTACCACGACCGCCTCATGAAGCTGGTCAAGGTCGGCGGCCTCGTCGG  
CTACGACAACACGCTCTGGAACGGCTCCGTCTGTGCTCCCCGCCGACGCGCCCATGCGC  
AAGTACATCCGCTACTACCGCGACTTCGTGCTCGAGCTCAACAAGGCCCTCGCCGCCG  
ACGAGCGCGTCGAGATCTGCCAGCTCCCCGTGGCGACGGCATCACCTCTGCCGCCG  
CGCCAAGTGAACCGTCCCTCCGGCCATCTTGGTCGCTCGACGGCGCGCGGCCACCAT  
GATGCCATCGTCTGCTCCTTCTGCCATAGATGCGAATTGAAGAAGGATTAATTATCGTTT



TGGCTTTCTTGGCTTTTGTATCTTTTTTTTGATATCACCATTTTCATACGTAAAAAAATGTCTG  
AGGCAATAATATTATAAGATGACCCGGTGTGTGTCA

>DfCCoAOMT15 (DfaB11G015250)

ACCTGGCTGCCCCGAACGCGCGGAGAAAGCAGGGTTGGTGGGCGGGCCCCGACCGCC  
GCTGCCTCTTCACCTTCCCGATGACCGTCCTGGAAGGAAGCCACCACCGATCCGTCAC  
CCATCCCTCTCCCCCCTCACTCGCGGCGCCTCTCCCCATCTGCTAGCGGGGAGGCCACC  
TGCGCAGCTGGCGCACGGGCGCGCTCCACGCACCGAAGCCAATCGCAGACTCGCAGT  
CCACCACCCACCCCCACCTTCTTGCTCTCCTATATCTCGCTCATTTTCGATTTAACTTTT  
AACGTCTACCTTATTTTTTTTCACTATTTCTAAATTTTATCTTTTTTCTAGCTTTTCTGCTTTT  
TTTGAGCTTTTTTGGCGGTTATTTTTTTGTATTCTGTTTGCATTACACGTGATGGGCTAAC  
ATATTTTTTCTATTTTAAAATTTTTTAAAATTTAATTATGCCAAATAATCCACCATCAATTAC  
AATGTAATTTTAGTTAGCTACAGTGCAATTTCAACCATAAACCACCAAATTTTCAGCTCA  
AATGAGCGGGCTGCTAATCGCTCACCAATCGTGTCCATCTTGTGCGGCGCGATAAATAA  
AGGGATAAGTCTACTTCTACCCACCGAACTCTTGTGCCATCTAACCTTCAACCCAAAAA  
ATATATAATCAAATATTTTGTGGTCTTCAACTATCAATACCATTATTTTATCTCTTAAAC  
TAATTAAGTGATTTTAACTGACATGACATCAACATGGTAATATTTTTTACACATGAGTT  
GGTTTTGAATGACATATCAACCATTCATCAAAATCATCAAATAAATCAAAAACATATGGT  
GAACAGGAGGCTAGATCTAGGGGAGGAGGCCAAAGAATTATCATGGGTGAGCTCACCT  
TTTTCTTCCGCTGTGACCTCACCTCCCAATCTCTCTCCTCTTCCTTCGTCCGTAGATCAT  
CACCGTCTTCTTCTTTATTATCCTAGAGGTTAGGACGATGTTGGGCGCGATGGGAGAGG  
GGGTCACAGAGGAGATGGATGCGTGGTGGAGGGCAACGAGGAGGGGGAGCTAGTGC  
AGGCCTCCTCCCTAGATTCAGCTATCGCTCTTAGCCTCCTCCCCAATTTCAAGTTGCGG  
CAACGGCAGCATTTAGCTGAAGCTACTTTGCTTTAATCCCTCACAATAAGGCCTAGATC  
TTGTGTGCCCTGGTCGCAGGGGCTGCCTCCTCTGTCCACTTCAATCACCAATAGCAACA  
TCTTGCCGCCCGCTCTAGTGAAAACGTAGGCGCAAAGGTCAGCGATGGTGTACCTTCA  
TCCACGTCATGATCTCCGCTCCAACGTCGATTAGATCATCTGCCGTGGTGATGAACTC  
CAGGGGAGAGGGAGAGAAGGGAAGAGAGAAGAAACATGGTGATAGTGTTGTTGCA  
AGCAGCTAGTGGCGTGGCCAATTGCGATATAGAGAAGAGAGGAAGAGATGAAATGAC  
ATGAGGTTGATAGGTGGGTCCCACTGTATATTTCTTATTTATATGATAATTATGCTGACTG  
AGTTGCTATGTACCCCTAAAACAAACTCATGTACCAAAAACTATTTCCATGTCAACGTC  
ACTAAGACAAAAATTGAGATGGAAAGGTCTCAAAGCAAAATATCCGTTTTTGATAGT  
TATGCGATATTGAATATCCGATTTTATAGTTTAAAGGTTGAAACTTAGACTATTTTAAAAAT  
TTAGGTGTACAATAGACTTATTTCTAAAATAATCTAGTACTGGTACCACTAGCATGTGTA  
TTCTACAGACCAGTCTTGAGTATCTGACACGCCGGGCCCAACGGCTGCTACAGACGAC  
TGTTCCACGTTCTCTCCTACGCGCAAGCCGACATGCCTCAGGCGACCAATCCACCGCG  
CCGCGTTATATAAAGCCGCCCGTTCTGGTCTCATCTCGGCAAGGTCAATCGAGCGAGCG  
AGAGCGCACCAAGCACAGCCAGATCTCGTTTCCTCTTCTAAGATCAGCAGCAATGCC  
ACCGCGACAGCCGAGGCGGCGACCGCGTCCAAGGAGCAGACCAACGGCAGCGGCGG  
CGAGCAGAAGACGCGCCACTCCGAGGTCGGGCACAAGAGCCTGCTCCAGAGCGACG  
CGCTCTACCAGTACATCCTGGAGACGAGCGTGTACCCGCGCGAGCACGAGTGCATGAA  
GGAGCTCCGCGAGGTCACCGCCAAGCATCCATGGTATGCGCGCTGCCATCCTCCTCCTC  
CTCGTCAGTCTTGATCTGAATCTGGTCTGCGAGATCGATGAGACCAATCGCTACAGTGC  
GGCATGTGGCGCCGCATTACATTTGGCCCCGGTTAATTTCTGTCGGATCTTGCCTGATCTC

GTGGCTGCAGGAACCTGATGACGACGTCGGCGGACGAGGGGCAGTTCCTGAACATGC  
TGCTCAAGCTCATCGGCGCCAAGAAGACCATGGAAATCGGCGTCTACACTGGCTACTC  
CCTTCTCGCCACCGCGCTCGCCATCCCCGAGGACGGCACGGTAAGTCCATCGATCAGC  
TAGCTACTACTACTTCCGCGGATCCGCAGATCCCCAGATCTGGCGAACTGAAATGATC  
GATGGCACCGATGATGCAGATCTTGGCCATGGACATCAACCGCGGAGAACTACGAGCTC  
GGCCTGCCCTGCATCGAGAAGGCTGGCGTCGCCCACAAGATCAACTTCCGCGAGGGG  
CCCGCCCTCCCCGTCCTCGACCAGCTCCTCGAGGACGAGAGCAACCACGGCTCGTTTCG  
ACTTCGTCTTCGTGGACGCCGACAAGGACAACCTCAACTACCACGAGCGCCTGAT  
GAAGCTGGTTAAGGTCGGCGGCCTCGTCGGCTACGACAACACGCTGTGGAACGGCTC  
CGTAGTGCTCCCCGCCGACGCGCCCATGCGCAAGTACATCCGCTACTACCGCGACTTC  
GTCCTCGAGCTCAACAAGGCCCTCGCCGCCGACGAGCGCATCGAGATCTGCCAGCTCC  
CCGTCGGCGACGGCATCACCTCTGCCGCCGTGTCAAGTGA

>DfCCoAOMT16 (DfaC11G007040)

TACGCTTACTAGACTGCAGAGCAGGGGCGTAGCTGGGCCTCCGGCCGCCGGGGCCGC  
AGCCCGAGACCCAGAGCAAAAAATCAACTATATAAATACTGTAGCAACAGTAAGATAG  
ACTGCAAAATTTTATTTCTAGTAGGCTAGGCCCGAGGCCAGCCACGGCTGGCTACAC  
CCCTGCTCCAGAGGGATAGCTGCCGTGTCAGGTTGGTGAATTTGGATCCCGATCCAGA  
AGATATTTTTCTTGGTCCAAACAAAGCTGGTCCTTTTGCATGGCACGATCATGTTTCTCC  
TCATCCTTAATTTAACATCGCATATCCACAGTGGCGGAGCCAACTATTTGGCTTGGTTTG  
GCAGCCGCCATACCTAAATCATATAAAAAAACGAATATATGTAGTATTTGTTCCAAGAAT  
CTTCATTTAGTGAGGTATTTTAAGTACCAATGCTTTGGATTTCTGTTATATTTGCTCATTA  
AAAGTAATATATATATATATATATATATATATATATATATATATATATATATATATATA  
TATATATATATATATATATATATATATATATATAGATAATGTTCTGGTGCGTCTTTGCATA  
GTTGATAGTTATATTATATATGTTTGACCAATTGACCTTGCAAACCCGCCACACCTGAAA  
ATTATTCCTGCCTCCGCCACTGCATATCCAGGTACTTGAGCTAGGCAAACACCATAACG  
GAGCAAACGCCACCTCATGCGACATACCAACAACCTCTACGGATCTATGCGTTACTAAA  
TTGGTTGTTACGAATTGTTAAGGTTTTTGGTCTTGCTTAAAAATGATGTGAATTTTGGT  
TTTTAGTTGTATCCTTCGACTTTTGATTAATTGTGAAAGAAATTAAGAGGTAAGAAACA  
CACGCATTAAGAAGCTCGCCTTATAAAAACTAAGTTGAAAAGTCACTCCGTTTATAAAC  
TGACTTCTAAAAAAACAAAATCTGTTTAGAACAAGGTCTTCATAGGAAAATGGACCAG  
AAAGACAACGAAAAAAGGGAGTTTTACCGTATTACGGCAGCAAATCAACACAATATCC  
AATTTGATCGTCAAACCTTATCGAATTTAGTTGAGCAAACTTAGCGTGCGCATGTTTG  
AAACGAGCCACCAAACCTCCCTATCCACCTCCTCTCCAGAGCAGTGCCCCCTAATTAATCG  
CACTCGCTTTTCCGTTTCGGGAGAGCGGAGTGTGTCTCCACCCAGCAACGAACGAACG  
AACGATGCCACGCACGGGAAAGAAGGTAGGTGAGCGGGCCCCGCGGCGGGCACCA  
ATTCGGGGCTTCACGGTGGGCCCCACGACCCCCCTCTTCACCCACCCGACGACCGTCC  
CGGGAAGCCACCACCACCCACCCGTTCTTTCCACCAACCTGGTCCCCACCCCGG  
TCCACCAAACCCCCAACGTGGCCACCCGCGCAGCGTATAGACGCGATGGTTACCGGCC  
GGCGGTGCACCACCCGGCGAAGCCAGAGGGGCCGCGGCCAAGAATAAACTACAC  
CAGCTCACCAGCCCAAAGAGCAAAGCTGTCTGTATTCTGCCGACCAGCTCGAGTCCCT  
GACACGTCGGGGCCACCGACTGCTGCACAGGACTGTTCCACGCTCTCTCTCCTGTTCGG  
TTAGTGGAATTTTTTGGGTAGATAGTTTAAATATTTGAATTTCTTGTTACTGTGAGAGGTA  
GTACGTAAAGAAAAATAGTTATATGCGATTTTAGTTGGTATACTTAAATGAGTATATTTT

ATTATAATTATTTTATGAACTACATTTTTTAAAAAATATCACTTAAAAACTAGTTATAGAAA  
GTACGAAAATAAACTAATTTTAACCTGAAGAGAATTTTAATCAGTAGGGGTACATCTA  
GTACCTGGCTTTTCTACGCGCAACTGGCGCAAGCCCACCTGCCTCTCCCAATCAATCCA  
CCACTGTGCGGCGTTATATAGATCGCCCGTTGCTTCTCAATCCTCATCTCCGCAAGGTC  
AATCGAGCGGGCAAAGCAAGTGCGCGCTACCGCTACACCCAGACCTCGCTTCCTCTCA  
GATCTGCAGCAATGGCCACCGCGACAGCCCAGACGACCGCGACGAAGGAGCAGACC  
AATGGCAGCGGGCGGCGAGCAGAAGACGCGCCACTCCGAGGTCGGCCACAAGAGCCT  
GCTCCAGAGCGACGCGCTCTACCAGTACATCCTGGAGACGAGCGTGTACCCGCGCGAG  
CACGAGTGCATGAAGGAGCTCCGCGAGGTCACCGCCAAGCACCCATGGTATGTTGCTG  
TCCCCCTCCACTTCTTCTGGATCTGCGAGATCGCCGAGATTAATGTCGGATCTTGCCTG  
ATCTTGTGGCTGCAGGAACCTGATGACGACGTCGGCGGACGAGGGCCAGTTCCTGAA  
CATGCTGCTCAAGCTCATCGGCGCCAAGAAGACCATGGAGATCGGCGTCTATACGGGC  
TACTCCCTCCTCGCCACCGCGCTCGCCATCCCCGAGGACGGCACGGTAAGTCTATCGAT  
CAGCTAGCTAGTACTTCCGCCCCGACCGCAGATTCCCAGATCTGGCAAGCTGAAATGAT  
CGATGGCACTCCTCGATATATGCAGATCTTGGCCATGGACATCAACCGCGAGAACTACG  
AGCTCGGCTTGCCCTGCATCGAGAAGGCCGGCGTCGCCCACAAGATCGACTTCCGCGA  
GGGCCCCGCCCTCCCCGTCCTCGACCAGCTTCTCGAGGACGAGAGCAACCACGGCTC  
CTTCGACTTCGTCTTCGTGGACGCCGACAAGGACAACCTCAACTACCACGAGCGG  
CTGATGAAGCTGGTCAAGGTCGGCGGCCTCGTCGGCTACGACAACACGCTCTGGAAC  
GGCTCCGTCTGTGCTCCCCGCCGACGCGCCCATGCGCAAGTACATCCGCTACTACCGGG  
ACTTTGTGCTCGAGCTCAACAAGGCCCTCGCCGCCGACGAGCGCGTCGAAATCTGCCA  
GCTCCCCGTCGGCGACGGCATCACCTCTGCCGCCGCGCCAAGTGAAGCCGCCCTCCC  
GCCGTGCTGGTCGCTCGACGGCGCGCCCGCACGCGCGCCATGATGCCGTCTATCTGCTG  
CTCCTACCATAGATGCGAACTGAAGAAGGATTAATTATCGTTTTTGGCTTCCTTTTTTCTT  
CTTCTTGGAATCGTCGTTTTCATATGTAAAAAATGTCGAGACAATAATATTATAAGATG  
ACCCGGTGTTTGTTAGTTTGCGTTGCGTGTGCGAATGGCGACCGCAGCTGATGAATCG  
ACGATGATATACTTTTTGAAA

>DfCCoAOMT17 (Dfa0G042980)

ATTTCTAAATCAAACACTAAAAACATATGTATTTCTAAACATTCGTGTGTATTTCTAAATC  
AAATCCTAAATCTAAACATTCATCAATCTCGCTCAAACCAAACCCTAAAAACATGTGTA  
TCTCTAAATCAAACCCTAAATCTAAACATTCATCAATCTCGCTCAAATCAAACCTTAAA  
AACATATGTATTTCTAAATCAAACCCTAAAAACATATGTATTTCTAAAAATCAAACCCTA  
AAAACGAATCTATACACATTACTACTTTTACATTACGCATATCTATTGAAAATCCAACCT  
AAAACCAAGCCAAATTTAACTAATTTTCATCTAGGGTTTCAAATCTTCCCACACGAAATG  
TACCTCAAATAATCCATATTTATTGCAAAAAATCAAGGGAAATGAGGGGGTTACCTTG  
CTTACTCGATTTGGAAGTAAAATCGCGAGAAAAAACGATGGATTTGAGTAGATTTTGA  
GGGGGAAGAGAGTGGTGGCGGCGGCGGCGGTTGCTTCGGCTCGGACTGAACAGAGT  
GAGGGGGTGGGGGGCTGCGCTCGGGCTTAAGTCCCAGAGCACGGCGCCACGGCCGTT  
AGCGCCGTTGGTACACAGCACGACGCCATGAGCTTTGGCGCCGAGCTCTGCCATCGTG  
GATCCTACGTGGCCAAGCACGGCGCCAAAGCATATGACGCCGTTCTGTGTACCTTGAG  
CGCCATATACTTTGGCGCCGTGGTAAGGGTCCATTTTTGCAAATCTTTTCTCCAGGGATC  
CATATGTAAAAAATTTCAAAATTTGGGCTAACAAGTAAAAATTTTACCATATTATTCTT  
CTCGAGAGCCTAGCGTGTCCACATCTCATTGACATGGGGGCCCCGCAGACGCCAAGCT

AATCTGCGTTCCCGTTTCTACTTGGGGAAAATTGCTCTCATACCACAAAGTTAAATACC  
ATCCTCCCTATTGCCACATACTTAAGTGGCTTTGTTATTATGCCACAACTTGAGTGTTT  
TTCCTTTCTTTTGCCATTTCCCTCCTCTTAAAGTCTATTTTAATTTTATTTTGCATTTCCCTA  
ACGTGAATTGACCTTTTTTGCCCTCGCTCCCCTACCTCGCCCTCAACGCTAACCTCCTTC  
CCCGCCGGCTGCCAACTCCCCCCCCCCCCGCCTCCCCTCCATCCACGCCACCGTCTCCC  
TCTTCAGCTCCGCCTCTGGGGTCCCCCTCGCCTCCGTCGACGGCTCCGCGCTCACCTC  
CTCCGCACCGCCGCGCTCTCCGCGCTCGCCGCATCCCCCATCTCCCCGACCGGCCCC  
CCTGCACCCTCCCCACCCGCATCGCCGGCGTGAAGGACCCGACCAGGTCCAGGTGC  
GCCCCGGCCGAGCTGTTCCCCCGCACGATCGGCTCCTACGACCCCATCGCGCAGCTC  
ACGACGTCCGCGCGGCCACCGCCTTGTCATGCCGTCGACCTCCTCGACGGTGATCC  
TCGGGTGCGCATCCCGAAGCTTCGAGGCGAGCACGGTGGAATTTGGCCCTGGTGCGGTT  
CCAGACGAGGATGCGGGAGATGGAGGAGAGGGCGGCCAGGTGGGCTTCGGCGAGGT  
AGGGCGCGAGGGCGCCAGCGGGACGACGAGGCGCTCCGGTGGGGGAGGGTGCAGGG  
GGGCCGGTTCGGGGGAGATGAGGGATGCGGTGAGCGTGAGACGGCGGCGGTGCGGA  
GGAGGGTGAGCGCGGAGCCGTCGACGGAGGCGAGGGGGACCCAGAGGCGGAGCTG  
AAGAGGGAGACGGCGGCGTGATGGAGGGGAGGCGGGGGGAGTTGGCGGCCGCGG  
GGAAGGAGGCTAGCGTTGAGGGCGAGGTAGGGGAGCGAGGGGCAAAAAGGTCAATTC  
AATGCAAAATAAAATTAAATAGACTTTAAGACGAGGAAATGGCAAAAGAAAGGAAA  
AAACACTCAAATTTGTGGCATAATAACAAAACCACTTAAGTATGTGGCAAAAGGGAGG  
ATGGTATTTAAGTTTGTGGTATGAGAGCAATTTCCCTTCTACTTGGCGGCTGCCTCCC  
GCGACGATGCCTCGCTTCGCCGTCGCCTCCTCCTCCCTTCCCTCCGGCGGCGGCGGCGG  
CGGCTGCTCTCGGGTTCGGCGCCACGCCTCCTTGCGTCCTCCAAGCCCAAACCTAGC  
CGCCGCCGCTCCGCCCCCGCCATGGCGCCGCGCCTGTGCATGTGCTCCTCCTCCTCG  
ACAGCGGCGGCGGTGGAGGAGGCGCGGCGCGGGCGGAAGCAGCTGGGAATGACACC  
GCAGCTCTACGACTACCTCCTCGCCAATGTCCGCGAGCACCCCGTACGCCACTCCCCCT  
CTCTTTGTGTATATCTCTATCGTTTTGAACAGTTGCTGCAATTTGGGGGGAATTTATTTT  
GCTAGGTCCTGACCCCTGACCAATGTGCGTGTGTTGTTTATCCTACTCTGGATACGCTTT  
TTAGATCCTTCGGGAGCTTCGCGAAGAGACGGCGGCCATGAGAGGAAGCCAGATGCA  
GGTACATTAGCATAACATAA ACTTAGAATACTACGCTTTAGAATTTAGATGGAGAGTGTA  
CGCCCCATTTCTGAGATCGTTGGATTTCCCATTTGCTGAGACACGGCCCCATTTTTGAGG  
TCGTTGGATTTCCCGTAGCTGAGTGTGCATCAAATGTGCTCATGCTTTATTCATAAAG  
CCACACTTAGTACAGTAGATTATAGCATGTCAGCCAAGTTTACAATAAAAAGGGCGTCC  
AACCTCAAATTTATATTTATCACAAAAGAACTTCTAAAAGATCCACAAGACGTAAAA  
CCAGTAATATCTCCTAGGGAATCATCAAAGTCTTCTTCGAAAGGCTCTTCATTGACTTTC  
GGAGTTTCTTTTGTGATATTTTAGCAAGTATGAGTACGACCGGCGCCTCAGCGGGGTG  
GCACGACTTCGCCGTCGCTCGTATGCATTGCCTCGACGGGACAGCATGCCTTTGCCA  
GGAGACTTCGCCACCCGGCTTGAGAGCATCGCTTCGGCGGGGCCGCATGACTTCGTCG  
CCCTCCTTG TAGTCATCGCTCGGCGGGATGGCCTGGCTTCGGCATAAGACTTCGCCGC  
CTGCCTTGAGGCATCGTCTCGACGGGGCGGCACGATGTCGACCACCTCGTACGCATC  
ACCTCGGAGGGACGTACCGGTTTTGGCGTGAGACTTCGCCGACCTCGTAGACGTTGCG  
TCGGAGGGACGAAGCCACCCCTGCTCTGCTTCCATAATTTCTTGGTGGACTCTGCAGTC  
GCATTATGATCAGTAAAAGAAAAACCTCTTCCAGGGGCTGCAAGCTATCAGTTGCATC  
GTCTCACCAGTCAGCACCCCTTGCCTTACTATTGGGGGACGGAGGGCTGGGATAGTTT  
GTCACGTCAGCTCGCCATCAGGACCTCCGCGCTTGCTATTGAGAGAGTTCTGTTGTAG

AGGTGGTCCAACCCCTGTGACTGTGCCTTGCAACTGGCTTAATATGTAATAGGCTCAA  
TAGTATAAAGGAATATACCAATGTACTCCTACCTTATGTAATTATTAAGGGATAGGAAGA  
ATTTCTCATCCTACTCCACTTATATATATAAACCCCAAGAGGGGCATGAGGAGGGGAG  
GTCCACTCATTTCCACATAACCATCTCTTTGTTGGCTCTCCTCTTCTAGGCTCCCTCTTTA  
CTATTTGGTCTGTATCCATAACATCTAATACTCTTTTAGTGTCGTTTTCTTGTTTTTTCCC  
TAGAATAGTCTTAATTATTTTCGTAGGTATATCCAAAAAAGAAATCCAATTTACATATTT  
ATAATTGTTTTTTCTGAAAATATAATGATAGTCCCTGGATACATTACCAAAATTCTGTATA  
ATGATAGTCACTTTCAGCTGGTTGTTTTGTTTTGGTAGGTTTCTCCCGCACAGGCTCAG  
CTGTTAGCGATCCTTGCGCAAACCTCTTGGAGCACAGCGATGTATTGAAGTCGGCATCTA  
TACTGTATGTGAACCTAGCGTTTTGTAATTTAGATGTTCCCTACCTTCCACTCAATCAGTA  
CTCAGTAAACACTAAATAGTACTAAGTTATTGTTTCTTCTTGGAACCATAGCATGCTATA  
TTGATGTTATGTTAGTTGTTAACATGTTGTCCTAGCACACCAAACATAGAATCCACACAT  
ATGTGCGAGACAAATAAGAAGTATATGATGAGTGGGTAAACAAATCATCTGTAACATCTC  
TGGTATCTGTCATTTTCCCTGGAAGTGATAGCATAATAGGCACTGCATCTTTCCAAGGTA  
TATACCCAGTAAGATTTTAAATAGTACTTTCAGAATGCTGGTACTCTCAGAATGCTGAAG  
CCTGAATCTTGCATATGTTTTCTTCCCTTCAAACAATATTTTCTGTCAGGGACAATAATG  
TAATGCATGATGTATTGTTTATGTCAACTTGTCAAGTGCTGGAATCATTAGCTACTTTTGT  
ACAAAAGCAACAATCATTGCAAATTTGGTAATCTTATCTTCTCACTCCTTAAATCTTTTC  
ACAGGGTTATTCATCATTAGCTGTAGCACTAGCACTTCCTGAATCAGGTCGTTTGGTTG  
CTTGTAAGGGACGAAAGATGTCTAGAAGTTGCCAAGAAATATTATCAGCGCGCTGG  
TGTTGCACACAAGGTGATTAATATATGTCTCTTCTTGCTTGATGAGGTCGGTTCATTATA  
ATCAATGAACACTACATAATTTCTGTATTTGTAGTTTACTTCTAGATTCTTGGCTAGAAATT  
TACAATCAATTGCATGTGATGTTTCAGTAGGTTGGAGAAGCTTGTTTTTGATACAAAGCT  
AAAATTCTTCCAAGTCCCAAGTTCCCAACCATAAAGATCATGGAAAAAATTTGTTCA  
GAAGCAGGGCAAAGCCTTCTTTTTAGTTTCACTAATTCCCCCTTATGTATTATTTATTTT  
ACATCATTGCTCTTGATTTGTTTCACTTTTTACTGACTTATGTAGCACACTATAGTTTAT  
GAAATTAGGAGTGCCGCCATTTAATGCATCACATTTATTTTGTAGGGAAACTAATCTGTG  
TAGGTTTAAATCTATATTTATTTCTTCTTAAATGATTTGTGAGCACTTAAAGTGAATGTT  
GACCTTTTTTTGGAATGCCTAGAATGTATAGCATATTAGTATTCAAGGACCGATTTGTATT  
CTTGCATATTAGATTTTCTATGCTGATCTGTCTTAAATTTGCTTAGGTTGATGTCAAGCAC  
TCTTTAGCTGTAGATTCCCTAAAGTTGTTGCTCGATTGTGGTGAAGCTTTCAGGTATAGT  
AATTTTGGTATGGTATAATCCATCATTATATTAGTTGACCTCTTGCATGCTCTAACTAATCT  
TTTCCTTTTCTGCTTTTTTCTAGTTATGACTTTGCATTCGTTGATGCAGACAAGAGAATG  
TATGAGGAATATTTTGAACCTTCTACTTAAGCTAGTAAGATTCAACATGAAGTTTACCTTG  
TGGGTTATTTATAACTCATTGTGGTTTACAACGCATGTTTTCACTCTCTGTTCCCATAGT  
GTTTTTTTCATAATATTATAGAAGATTCCCCATTCTTGCCATAAGTTTTATGATTTTATCTA  
TACTTCCGTACATAGTGATCGTAGTACTTATGCTTTTTTATATGTTGAACATTATGTTTTG  
TTGTGTTGTAGGTAAGAGTTGGTGGTTTAAATTGTAATGGACAATGTCCTTTGGTACGGA  
AGGGTTGCTGATCCGCTAGTAAGTTCTGTTCTCTTTTTGAGTTTTGACATGATAAAGATG  
TTACAGGGTAGACATTAGGTAACACTTTTCTCTGGCATTTTTTCCTTAGGTGAATGACGC  
AAAGACAATCAGTATAAGGAACTTCAATAAGAACTTTTGGAGGATAAACGTGTCAAT  
ATCAGCATGGTCTCTTCCTCTCTCTACCTCTCATATGTTTGGTCTACCACATAGTTATT  
AGTCATTACTTGCGAATGTTGATTGTGAAGCCTTAGAAAATATTTTATATGTCTGCATATT  
TATTCTGTCGCCTAGAGCATGTGAAGAGCACCAACAATGATGTGTAGCGGCACTGCAAT

GCCAGCACAGTAAATATCCCAAATTCGAAATTTTTATTTGCCTAATAATGTGGCACATTC  
AAGCCATGGTCATGTATACCTGTTTGGATGGGGGGTATGGATTCGAATCCTTAGGATTTA  
GTTCAAATTTGCACTAAATCCCAAAAATTCACAAGGAAATCCCCCTCATCCAAACACCC  
CCTAAATGTGTTGTCCTCTTCACTATCTTTATAGTTGTTCAACTGCTTCAGAACCTTTATA  
ACCCCCTGTATCCAAACCTTCTTTTGATACACCATCGTTTGGTTTTAGTACAACCTTCTGT  
GAGAAGAAAACGGTATGTGTAACATTGCTCCAATTACAAGTGTATTCTTGTAACCGTAT  
GCAATGAGAACCATAATATTGGTACCATTTAGATTTTCATTTGACATGCTTATATCATGAT  
TCAGTGCATCATATCCCATGCCCTTCTCATGTGTTGTCTGTTTCATACCACCTGTCTGTGC  
TTTAGTACTGGATCTTAATTAACAATGGTATTATATTTTTGAGAAATTTGCAGGTGCCAAT  
TGGGGACGGGATGACAATTTGTCGGAAGCTAGTAGATACTCCCCTTCCGAGGTCAAGC  
TCTCAATGA
